# Supplementary material for: Banana (Musa acuminata) transcriptome profiling in response to rhizobacteria: Bacillus amyloliquefaciens Bs006 and Pseudomonas fluorescens Ps006
Source: BMC Genomics. 2019 May 14;20:378. doi: 10.1186/s12864-019-5763-5 (PMC6518610; doi:10.1186/s12864-019-5763-5)
Supplement: Supplementary file 2 — Table S2. Statistics and list of differentially expressed genes in samples inoculated with B. amyloliquefaciens (Bs006). Results at different analysis times (1 h, 48 h, 96 h), shared genes between times, and those exclusively expressed at a specific time are in different tabs. (XLS 10271 kb) [file 12864_2019_5763_MOESM2_ESM.xls]

## Sheet: Bacillus_1h_Full_List
NCBI Gene	log2FC	log2CPM	PValue	FDR
LOC103975460	-3.03728	5.15796	3.10883e-15	7.62081e-11		Statistics and list of 2653 differentially expressed genes in treatment Bacillus 0h. See figure below.
LOC103976494	-4.3969	6.94331	5.37737e-15	7.62081e-11
LOC103970816	5.70127	6.09957	2.34914e-14	2.21947e-10
LOC103996021	4.25207	2.8985	5.9101e-13	4.1879e-09
LOC103999297	3.12853	4.7535	1.07607e-12	5.74692e-09
LOC103976762	5.07246	3.36358	1.21654e-12	5.74692e-09
LOC103972371	3.43924	4.0554	3.51669e-12	1.41078e-08
LOC103997701	4.82013	5.82962	3.98188e-12	1.41078e-08
LOC103987231	4.25647	5.71967	1.24186e-11	3.91103e-08
LOC103978608	-3.46218	4.56009	1.43964e-11	4.08053e-08
LOC103974264	2.855	5.87798	1.6459e-11	4.24104e-08
LOC103971514	2.89859	5.04844	1.80664e-11	4.26728e-08
LOC103988028	4.16664	7.63654	2.97701e-11	6.4908e-08
LOC103977015	3.71729	4.74417	3.29444e-11	6.66983e-08
LOC103979145	4.21575	8.38263	4.89598e-11	8.70856e-08
LOC103979906	5.47368	6.6386	4.91592e-11	8.70856e-08
LOC103979463	-3.30897	4.05268	5.89428e-11	9.8275e-08
LOC103984670	-4.4756	2.84506	7.70606e-11	1.18216e-07
LOC103984267	2.91137	5.09023	7.92444e-11	1.18216e-07
LOC103972232	-2.76883	5.9954	8.85615e-11	1.25509e-07
LOC103980924	-4.69434	2.33945	1.2101e-10	1.63329e-07
LOC103991437	1.90778	6.30957	1.298e-10	1.67229e-07
LOC103974595	3.74715	5.36168	1.40672e-10	1.73357e-07
LOC103969637	3.06958	6.26807	2.05708e-10	2.42941e-07
LOC103974240	-2.49216	3.68407	2.24495e-10	2.54524e-07
LOC103981462	2.451	5.36442	2.86044e-10	3.11832e-07
LOC103977739	-2.91127	4.55014	3.91404e-10	3.99006e-07
LOC103976563	4.29245	7.02215	3.94164e-10	3.99006e-07
LOC103997954	3.43134	8.20485	4.36489e-10	4.26616e-07
LOC103968637	-2.59473	5.44126	4.73074e-10	4.4696e-07
LOC103989097	3.17166	9.97476	5.64515e-10	5.11669e-07
LOC103980148	3.36598	7.15204	5.77667e-10	5.11669e-07
LOC103997430	2.85324	4.38316	7.2363e-10	6.21532e-07
LOC103976469	3.35712	4.66082	7.85302e-10	6.54664e-07
LOC103987026	4.245	6.08796	8.39941e-10	6.80208e-07
LOC103977376	4.3178	5.70682	9.20782e-10	7.24962e-07
LOC103974201	4.14711	5.84253	9.7819e-10	7.49347e-07
LOC103988335	4.96618	3.9851	1.15744e-09	8.43635e-07
LOC103993962	2.75273	5.77473	1.1608e-09	8.43635e-07
LOC104000370	4.05963	4.75417	1.45491e-09	1.03095e-06
LOC103995233	-2.97951	3.27197	2.13012e-09	1.45536e-06
LOC103997668	3.3261	5.94393	2.17603e-09	1.45536e-06
LOC103976551	3.19091	4.52656	2.20789e-09	1.45536e-06
LOC103986184	7.09403	9.39406	2.3313e-09	1.50178e-06
LOC103985269	4.41301	5.37416	2.72182e-09	1.71438e-06
LOC103977010	-2.95125	6.57311	2.95885e-09	1.79547e-06
LOC103984066	-3.76066	4.53122	2.97725e-09	1.79547e-06
LOC103987288	-3.54308	4.91715	3.05016e-09	1.80112e-06
LOC103970363	2.59583	8.04417	3.49568e-09	1.96045e-06
LOC103983200	2.93713	4.90665	3.52253e-09	1.96045e-06
LOC103976055	-2.94072	3.35095	3.52747e-09	1.96045e-06
LOC103970499	-6.43549	2.54776	3.63082e-09	1.97908e-06
LOC103996689	3.42246	3.88362	3.85172e-09	2.05987e-06
LOC103999983	2.41669	7.37449	4.39215e-09	2.30539e-06
LOC103969395	4.08963	7.06185	4.59948e-09	2.37032e-06
LOC103982650	2.36788	5.04874	5.05862e-09	2.56039e-06
LOC103968860	3.8016	4.3403	5.92753e-09	2.92382e-06
LOC103993479	-2.86093	5.95707	5.98297e-09	2.92382e-06
LOC103989522	-3.58079	4.66598	6.09905e-09	2.93002e-06
LOC103970154	6.43935	4.64686	6.77466e-09	3.20035e-06
LOC103992722	3.69701	5.41525	7.71837e-09	3.58639e-06
LOC103990992	2.94913	5.00356	7.99859e-09	3.65665e-06
LOC103974383	3.44713	5.77797	8.44908e-09	3.80128e-06
LOC103987671	2.59755	6.43628	8.82967e-09	3.91044e-06
LOC103994095	2.07462	8.60462	9.68554e-09	4.22349e-06
LOC103974153	4.07807	6.53329	1.14448e-08	4.91502e-06
LOC103976712	3.93629	8.5406	1.21722e-08	5.07789e-06
LOC103990718	2.87084	5.16242	1.21823e-08	5.07789e-06
LOC103972710	4.0502	3.50997	1.25044e-08	5.12685e-06
LOC103993486	-3.32019	4.0395	1.2748e-08	5.12685e-06
LOC103970275	-3.38212	2.61495	1.28424e-08	5.12685e-06
LOC103982272	3.63648	3.08757	1.35046e-08	5.2569e-06
LOC103977170	3.09549	5.07783	1.35392e-08	5.2569e-06
LOC103994758	2.91848	6.58812	1.42854e-08	5.4717e-06
LOC103984504	2.78112	3.71992	1.57125e-08	5.90066e-06
LOC103972219	2.37492	5.51279	1.58217e-08	5.90066e-06
LOC103985850	2.56918	6.54475	1.65502e-08	6.09218e-06
LOC103975363	4.26996	4.15437	1.69058e-08	6.1433e-06
LOC103997102	3.9677	5.78977	1.84164e-08	6.60751e-06
LOC103983145	2.85557	3.38641	1.86987e-08	6.62494e-06
LOC103971083	6.10916	6.41914	2.01389e-08	7.04713e-06
LOC103991228	7.30307	1.66014	2.38112e-08	8.23054e-06
LOC103997446	3.98865	7.40777	2.49429e-08	8.51783e-06
LOC103989135	-3.44627	3.60189	2.55921e-08	8.63552e-06
LOC103985370	2.27153	4.32426	2.63304e-08	8.7801e-06
LOC103995296	3.2566	5.85678	2.86913e-08	9.45613e-06
LOC103990442	4.79628	6.24744	3.43615e-08	1.11947e-05
LOC103997962	-1.91334	4.27235	4.06426e-08	1.30583e-05
LOC103975524	1.68975	6.26982	4.14216e-08	1.30583e-05
LOC103995544	7.59258	7.05755	4.14638e-08	1.30583e-05
LOC103978934	3.27227	4.21679	4.21395e-08	1.31253e-05
LOC103997204	2.74818	5.66311	4.44702e-08	1.37007e-05
LOC103974594	4.16901	3.91757	4.60712e-08	1.40413e-05
LOC103987025	3.38226	5.49185	4.79955e-08	1.44722e-05
LOC103987486	-3.74104	6.11785	5.03782e-08	1.50307e-05
LOC103997912	-3.49869	5.37184	5.13385e-08	1.50597e-05
LOC103989184	-4.56533	2.22311	5.15379e-08	1.50597e-05
LOC103988074	3.82737	3.60116	5.3364e-08	1.54034e-05
LOC103984487	-3.49446	5.09435	5.40793e-08	1.54034e-05
LOC103981411	-3.63336	3.1542	5.43444e-08	1.54034e-05
LOC103987792	-3.05924	5.95099	5.56625e-08	1.56208e-05
LOC103978913	2.71621	6.43449	5.8763e-08	1.63292e-05
LOC103990705	2.25977	4.76141	6.21306e-08	1.69518e-05
LOC103980226	-4.19546	3.41691	6.21998e-08	1.69518e-05
LOC103994628	2.8261	4.28754	6.28709e-08	1.69716e-05
LOC103980191	-3.8134	4.24672	6.5199e-08	1.7434e-05
LOC103977597	2.61387	6.10308	6.7612e-08	1.79102e-05
LOC103989901	7.56112	5.72877	7.28436e-08	1.91174e-05
LOC103991525	-3.30604	4.7701	7.36836e-08	1.91604e-05
LOC103971673	3.12267	5.28648	7.64169e-08	1.96906e-05
LOC103977081	-5.47557	1.26905	7.93423e-08	2.01539e-05
LOC103979867	2.27745	6.26298	7.96372e-08	2.01539e-05
LOC103995925	4.00811	5.0876	8.09479e-08	2.03043e-05
LOC103989174	3.38717	6.21753	8.20525e-08	2.04008e-05
LOC104000490	2.93822	7.13417	8.80074e-08	2.16911e-05
LOC103991753	3.29892	5.53399	9.38519e-08	2.29322e-05
LOC103976124	2.87478	3.88744	9.6324e-08	2.31154e-05
LOC103973720	1.92266	5.15644	9.65226e-08	2.31154e-05
LOC103999492	2.41368	5.19132	9.70483e-08	2.31154e-05
LOC103987112	-1.83302	4.60791	1.03578e-07	2.4154e-05
LOC103995602	2.65336	6.84673	1.03787e-07	2.4154e-05
LOC103980228	-4.28894	2.19082	1.03965e-07	2.4154e-05
LOC103996656	-3.74127	4.32217	1.12207e-07	2.57957e-05
LOC103987605	4.07261	7.06542	1.12852e-07	2.57957e-05
LOC103998853	2.14619	5.28101	1.19201e-07	2.69126e-05
LOC103995966	-3.06137	4.06355	1.19637e-07	2.69126e-05
LOC103978006	2.53944	3.77054	1.2342e-07	2.7545e-05
LOC103994781	2.31262	7.52709	1.28508e-07	2.84566e-05
LOC103974847	6.20765	7.41448	1.42995e-07	3.12018e-05
LOC103991939	-2.56854	7.48509	1.43107e-07	3.12018e-05
LOC103969018	2.52337	4.78011	1.46228e-07	3.16388e-05
LOC103977780	-3.06275	3.04703	1.49453e-07	3.18792e-05
LOC103991693	4.80155	2.93653	1.49589e-07	3.18792e-05
LOC103990815	-2.49912	6.06835	1.52173e-07	3.21881e-05
LOC103990171	2.68745	6.1052	1.56541e-07	3.28666e-05
LOC103999505	4.02341	7.3419	1.71168e-07	3.54327e-05
LOC103975144	5.19359	6.01597	1.71263e-07	3.54327e-05
LOC103990385	3.60065	4.33826	1.74359e-07	3.58119e-05
LOC103989487	2.59962	6.17304	1.7896e-07	3.60516e-05
LOC103996732	2.06169	4.81167	1.79273e-07	3.60516e-05
LOC103981195	2.81917	5.74444	1.80444e-07	3.60516e-05
LOC103980556	-3.63468	3.29245	1.8111e-07	3.60516e-05
LOC103996804	-2.53729	3.82749	1.81886e-07	3.60516e-05
LOC103980727	3.23689	5.45111	1.84592e-07	3.63338e-05
LOC103968557	-2.3352	5.73525	1.90729e-07	3.72829e-05
LOC103979635	6.39003	3.00424	1.97116e-07	3.82674e-05
LOC103995831	4.49662	4.10713	2.05829e-07	3.96872e-05
LOC103978757	-2.28913	5.15743	2.12401e-07	4.06777e-05
LOC103979400	-6.924	2.54896	2.15505e-07	4.09952e-05
LOC103975461	-3.03285	5.27568	2.17775e-07	4.11508e-05
LOC103998875	-2.62054	4.11258	2.34941e-07	4.41005e-05
LOC103974198	4.25519	8.85939	2.36638e-07	4.41267e-05
LOC103968495	2.03857	4.78578	2.44156e-07	4.5231e-05
LOC103992251	-3.46489	4.16614	2.62655e-07	4.82065e-05
LOC103975348	-2.54316	3.52939	2.64876e-07	4.82065e-05
LOC103996822	5.3486	2.65743	2.65319e-07	4.82065e-05
LOC103979480	-2.1596	4.3581	2.71239e-07	4.86908e-05
LOC104001024	-2.52033	7.35365	2.71421e-07	4.86908e-05
LOC103980237	3.84753	4.8699	2.75896e-07	4.91824e-05
LOC103986537	2.88017	4.54662	2.78623e-07	4.93581e-05
LOC103970446	2.75453	8.31496	3.02099e-07	5.31844e-05
LOC104000360	5.06539	7.49537	3.16833e-07	5.54341e-05
LOC103993575	3.58111	4.23628	3.26801e-07	5.64381e-05
LOC103972334	1.87862	4.74628	3.27648e-07	5.64381e-05
LOC104000193	4.02068	5.2242	3.29674e-07	5.64381e-05
LOC103990187	4.42392	8.08261	3.30537e-07	5.64381e-05
LOC104000507	4.98693	10.4543	3.33859e-07	5.6664e-05
LOC104000361	4.33588	7.13559	3.43404e-07	5.79372e-05
LOC103995447	3.90248	4.74801	3.57167e-07	5.99027e-05
LOC103994450	-2.90851	4.15418	3.66048e-07	6.1031e-05
LOC103998504	-5.64345	3.54377	3.80129e-07	6.3008e-05
LOC103987271	5.23388	5.51854	4.02009e-07	6.62473e-05
LOC103983019	-2.19006	5.17188	4.16021e-07	6.816e-05
LOC104000509	2.21609	4.96101	4.21971e-07	6.87168e-05
LOC103972416	-2.44673	5.24011	4.24268e-07	6.87168e-05
LOC103999202	2.4301	7.01436	4.33898e-07	6.98773e-05
LOC103974236	-2.23059	4.98777	4.39556e-07	7.03885e-05
LOC103985028	3.54683	5.46214	4.563e-07	7.26594e-05
LOC103979686	3.60924	5.18385	4.70952e-07	7.45735e-05
LOC103971548	2.03754	4.18554	4.76616e-07	7.45864e-05
LOC103976071	-3.77842	5.70043	4.77268e-07	7.45864e-05
LOC103981479	2.02093	4.05515	4.78927e-07	7.45864e-05
LOC103986072	2.98893	5.52331	4.85204e-07	7.47139e-05
LOC103974922	-1.90688	3.2023	4.85695e-07	7.47139e-05
LOC103974846	4.82484	8.83221	4.87654e-07	7.47139e-05
LOC103980457	3.25683	6.24001	5.03406e-07	7.67125e-05
LOC103983853	1.45545	6.02746	5.15539e-07	7.81414e-05
LOC103999201	-1.95369	4.52231	5.32259e-07	7.99615e-05
LOC103974038	-1.94708	4.58387	5.33189e-07	7.99615e-05
LOC103993131	3.79164	6.06392	5.36291e-07	8.00034e-05
LOC103978344	4.2592	7.15741	5.39433e-07	8.00508e-05
LOC103972159	-5.24074	1.52076	5.51207e-07	8.1372e-05
LOC103987503	3.42767	4.24974	5.55808e-07	8.1626e-05
LOC103986931	1.58633	5.98178	5.61579e-07	8.20485e-05
LOC103987054	2.56858	3.55971	5.72012e-07	8.31233e-05
LOC103989520	3.44708	3.39833	5.74802e-07	8.31233e-05
LOC103971393	-1.7146	6.47544	5.78829e-07	8.32809e-05
LOC103987612	6.44462	6.12254	6.15009e-07	8.80395e-05
LOC103990512	2.97126	4.54915	6.35363e-07	9.04961e-05
LOC103977229	2.16682	8.21766	6.48778e-07	9.19449e-05
LOC103994154	2.16421	3.4971	6.57182e-07	9.26724e-05
LOC103990562	3.88109	4.97993	6.68533e-07	9.34894e-05
LOC103999797	2.2696	4.59857	6.69572e-07	9.34894e-05
LOC103984951	4.48485	5.24236	7.28305e-07	0.000100766
LOC103994659	-2.59984	8.18006	7.28798e-07	0.000100766
LOC103996400	2.79537	4.6325	7.34674e-07	0.000101085
LOC103981355	-3.88971	1.84773	7.38583e-07	0.000101132
LOC103968367	1.70043	4.28371	7.46386e-07	0.000101654
LOC103978093	-3.53722	3.72943	7.53431e-07	0.000101654
LOC104000762	3.35394	6.96534	7.56733e-07	0.000101654
LOC103972926	2.4501	2.86699	7.56742e-07	0.000101654
LOC103972276	3.51919	8.92437	7.60812e-07	0.000101719
LOC103990072	3.71785	6.60442	8.0651e-07	0.000107323
LOC103984569	1.92845	5.24199	8.31324e-07	0.000110108
LOC103985629	2.02587	10.0022	8.58786e-07	0.000113216
LOC103976941	2.60173	5.36824	8.954e-07	0.000117496
LOC103991893	3.88755	8.69407	9.18252e-07	0.00011994
LOC103976420	-3.13272	6.50469	9.26859e-07	0.000120029
LOC103991562	2.47061	7.91129	9.27406e-07	0.000120029
LOC103990700	4.01566	4.30858	9.35538e-07	0.000120531
LOC103987272	8.00786	-0.978835	9.98093e-07	0.000128009
LOC103977085	2.56762	6.70393	1.00977e-06	0.000128923
LOC103975229	2.23704	7.26322	1.01589e-06	0.000129123
LOC103992026	-3.02083	4.34429	1.02851e-06	0.000129689
LOC103987677	3.17828	6.65915	1.0295e-06	0.000129689
LOC103993715	-2.71545	4.32372	1.04111e-06	0.000130572
LOC103992386	-3.2652	3.28045	1.05468e-06	0.000131691
LOC103995115	-3.74181	8.06406	1.06852e-06	0.000132331
LOC103971050	1.92058	4.33208	1.07274e-06	0.000132331
LOC103979602	2.23373	3.66914	1.0754e-06	0.000132331
LOC103984282	3.21194	7.18903	1.07848e-06	0.000132331
LOC103972017	2.18925	3.5099	1.12549e-06	0.000137504
LOC103982776	2.4387	3.75821	1.13057e-06	0.000137532
LOC103989376	-5.05033	3.86441	1.14691e-06	0.000138923
LOC103994198	1.69014	4.34256	1.16224e-06	0.000140182
LOC103973881	-2.4957	5.55925	1.17574e-06	0.000141005
LOC103981466	6.26603	3.01139	1.18272e-06	0.000141005
LOC103985391	-1.95746	5.49957	1.18677e-06	0.000141005
LOC103969394	6.08379	6.00749	1.19285e-06	0.000141005
LOC103996663	-2.56536	3.97629	1.197e-06	0.000141005
LOC103973359	2.42625	3.21987	1.19892e-06	0.000141005
LOC103991040	6.27285	4.25011	1.21861e-06	0.000142728
LOC103997026	2.40073	5.87054	1.27125e-06	0.000148282
LOC103993865	4.09709	3.10428	1.30796e-06	0.000151938
LOC103995079	2.70075	3.7625	1.33642e-06	0.00015461
LOC103985026	1.57642	7.22181	1.34511e-06	0.000154982
LOC103981205	-2.76925	6.44893	1.35633e-06	0.000155068
LOC103985623	1.98123	7.83333	1.35679e-06	0.000155068
LOC103995199	-3.24732	4.14055	1.394e-06	0.000158681
LOC103993672	2.10933	5.83842	1.40463e-06	0.000159252
LOC103968749	1.90316	4.03364	1.41124e-06	0.000159363
LOC103990561	11.4122	2.12564	1.44778e-06	0.000162841
LOC103989225	-4.1781	2.10491	1.46216e-06	0.000163257
LOC103989568	-2.80876	3.12377	1.463e-06	0.000163257
LOC103998043	2.29754	8.07749	1.51541e-06	0.000168442
LOC103993625	2.84894	2.38908	1.52444e-06	0.000168784
LOC103987024	2.78338	5.76563	1.53343e-06	0.000169119
LOC103990831	2.75292	6.57906	1.54755e-06	0.000170015
LOC103990125	-2.94005	5.95877	1.57964e-06	0.00017287
LOC103983555	3.52898	3.6275	1.61327e-06	0.000175872
LOC103991518	2.10765	9.27703	1.644e-06	0.000178535
LOC104000307	2.25201	6.49535	1.65967e-06	0.000179549
LOC103979734	2.54476	3.11363	1.72451e-06	0.000185854
LOC103978252	4.09406	8.2275	1.76099e-06	0.000189067
LOC103997428	2.60852	6.06902	1.78983e-06	0.000191218
LOC103986636	4.98888	5.2157	1.79453e-06	0.000191218
LOC103972227	3.1213	5.36575	1.81889e-06	0.000193088
LOC103986181	2.09366	8.66916	1.83036e-06	0.000193581
LOC103996657	-3.06857	8.27359	1.84386e-06	0.000194284
LOC103995280	2.80271	4.98725	1.8605e-06	0.000195312
LOC103985296	2.14114	6.41419	1.90817e-06	0.000199471
LOC103998545	-3.14169	3.39992	1.9142e-06	0.000199471
LOC103995390	1.93483	7.35023	1.92412e-06	0.00019977
LOC103969029	2.73974	4.4611	1.95873e-06	0.000202621
LOC103980827	1.80885	4.63388	1.99947e-06	0.000206084
LOC103970139	2.02823	4.28301	2.05206e-06	0.000210737
LOC103968583	2.7789	3.47853	2.16256e-06	0.000221284
LOC103989513	6.6524	2.59354	2.19266e-06	0.000222691
LOC103999329	7.44757	2.25245	2.19305e-06	0.000222691
LOC103991638	-3.85037	3.28008	2.19988e-06	0.000222691
LOC103987751	-2.04758	6.91636	2.23246e-06	0.000225185
LOC103973558	-1.69581	4.65556	2.25626e-06	0.00022601
LOC103982666	-3.20917	4.55275	2.25659e-06	0.00022601
LOC103986590	4.72295	1.2932	2.27302e-06	0.000226853
LOC103995574	2.7183	10.8618	2.31787e-06	0.000230317
LOC103985401	-8.65937	1.28605	2.32397e-06	0.000230317
LOC103999066	2.50748	6.97423	2.37162e-06	0.000233619
LOC103970943	1.79585	8.36835	2.37377e-06	0.000233619
LOC103982701	-1.76248	5.11041	2.39039e-06	0.00023444
LOC103970034	1.39267	5.54217	2.44268e-06	0.000237365
LOC103995809	6.51152	3.05825	2.44304e-06	0.000237365
LOC103985511	1.9468	4.48048	2.44954e-06	0.000237365
LOC103995783	-2.14532	4.66616	2.46118e-06	0.000237365
LOC103990142	2.93466	4.5576	2.46209e-06	0.000237365
LOC103984435	1.48167	7.63719	2.71331e-06	0.000260698
LOC103992871	-3.13934	4.08235	2.72817e-06	0.000261241
LOC103975616	-3.80637	1.22444	2.74036e-06	0.000261525
LOC103969187	-2.00432	7.29673	2.77337e-06	0.000263787
LOC103997884	2.70817	6.46215	2.81148e-06	0.000266517
LOC103991351	-2.02098	4.1925	2.86943e-06	0.000271104
LOC103998479	3.64813	4.58975	2.89041e-06	0.000272179
LOC103981485	1.66759	3.15791	2.9861e-06	0.000280259
LOC103977596	2.83138	5.53195	3.0165e-06	0.000282015
LOC103978831	-4.44074	2.71776	3.02472e-06	0.000282015
LOC103991516	2.4562	7.74818	3.05072e-06	0.000283507
LOC103977529	-2.86752	2.63075	3.06863e-06	0.000284239
LOC103985006	-3.67546	3.10494	3.09423e-06	0.000285037
LOC103968788	2.98503	6.19596	3.10273e-06	0.000285037
LOC103973263	-4.91817	1.78657	3.11603e-06	0.000285037
LOC103992117	2.2945	5.38843	3.12103e-06	0.000285037
LOC103969231	2.03612	5.85667	3.12752e-06	0.000285037
LOC103981728	3.38357	2.05761	3.1639e-06	0.000286826
LOC103976374	-5.40656	1.43046	3.16739e-06	0.000286826
LOC103996108	-2.0769	5.93589	3.2158e-06	0.000290282
LOC103973182	-1.95089	6.70861	3.39187e-06	0.000305204
LOC103992120	2.09091	6.45454	3.49612e-06	0.000312605
LOC103979845	3.28961	5.97111	3.50636e-06	0.000312605
LOC103971797	-4.15607	3.05812	3.51211e-06	0.000312605
LOC103986123	-3.78478	1.74928	3.51824e-06	0.000312605
LOC103997880	2.33774	6.0212	3.67294e-06	0.000325331
LOC103983842	1.99205	8.793	3.73203e-06	0.000329535
LOC103991234	2.89522	3.24947	3.85662e-06	0.000339479
LOC103969713	3.0108	5.44928	3.88789e-06	0.000341171
LOC103995183	-3.24607	5.05453	3.92356e-06	0.000343239
LOC103989952	-5.27038	1.77791	3.99572e-06	0.000348476
LOC103977533	2.64442	3.08206	4.02887e-06	0.000349287
LOC103973488	1.48888	7.17437	4.02966e-06	0.000349287
LOC103972170	1.91972	7.58853	4.05789e-06	0.000349837
LOC103994549	-7.88666	3.09735	4.0607e-06	0.000349837
LOC103978885	3.49275	4.5071	4.22686e-06	0.000363048
LOC103973220	3.92777	4.24676	4.24303e-06	0.000363337
LOC103968936	4.39191	9.76291	4.37016e-06	0.000372994
LOC103997495	-2.064	10.7563	4.38212e-06	0.000372994
LOC103998373	-2.89614	4.1161	4.53006e-06	0.000383632
LOC103979498	-3.70101	3.90991	4.53418e-06	0.000383632
LOC103989169	5.01434	1.95493	4.57279e-06	0.000384606
LOC103978302	2.31	5.07936	4.57283e-06	0.000384606
LOC103988634	7.79439	5.14677	4.60688e-06	0.000386323
LOC103993022	2.35343	6.48383	4.68129e-06	0.000391405
LOC103982946	-2.33764	5.51147	4.69637e-06	0.000391511
LOC103987500	3.12025	2.02786	4.84588e-06	0.000401973
LOC103969359	-1.50595	4.59489	4.86026e-06	0.000401973
LOC103992086	1.84495	3.94246	4.8644e-06	0.000401973
LOC103996109	1.57536	4.19727	4.90948e-06	0.000403943
LOC103999171	2.16494	5.98598	4.91675e-06	0.000403943
LOC103987455	2.63471	5.75481	5.05185e-06	0.000413843
LOC103981848	1.56782	5.28318	5.33643e-06	0.000435895
LOC103996185	2.4387	4.07939	5.35872e-06	0.000436459
LOC103969080	-3.60999	2.41264	5.46343e-06	0.000443712
LOC103972013	-3.16597	10.6828	5.50639e-06	0.000445903
LOC103987928	-4.55152	1.69356	5.52188e-06	0.000445903
LOC103988708	-3.23806	6.01416	5.53855e-06	0.000445979
LOC103996996	2.26384	3.11726	5.57091e-06	0.000447314
LOC103994454	2.42027	2.83038	5.66602e-06	0.000453097
LOC103969994	11.3489	2.05219	5.6749e-06	0.000453097
LOC103969100	-4.69867	3.04809	5.70444e-06	0.000454176
LOC103977558	-2.76545	6.66638	5.81967e-06	0.000460585
LOC103975985	2.39772	4.86339	5.82864e-06	0.000460585
LOC103987873	-3.31685	5.20731	5.83368e-06	0.000460585
LOC103990574	3.13901	3.68775	5.91669e-06	0.000465841
LOC103980327	2.81525	5.08721	6.10512e-06	0.000476627
LOC103994686	2.10098	6.0433	6.11995e-06	0.000476627
LOC103989569	2.62581	4.27634	6.12056e-06	0.000476627
LOC103999647	2.98534	7.5402	6.12096e-06	0.000476627
LOC103986375	2.24882	4.89405	6.23391e-06	0.000484093
LOC103980319	-3.91839	4.20568	6.26148e-06	0.000484905
LOC103990102	3.18698	6.06826	6.31089e-06	0.000486294
LOC103972028	1.48329	5.33232	6.32874e-06	0.000486294
LOC103993909	-2.16723	3.0928	6.33089e-06	0.000486294
LOC103971799	1.7147	5.61845	6.37523e-06	0.000488377
LOC103986001	2.21056	5.85838	6.3976e-06	0.000488769
LOC103989871	4.65654	3.65591	6.44487e-06	0.000491058
LOC103991150	3.81222	5.83406	6.53573e-06	0.000496646
LOC103994725	-3.15305	3.71841	6.56648e-06	0.000497648
LOC103983661	-3.48247	6.29401	6.66686e-06	0.000503908
LOC103996333	-2.05454	3.85697	6.715e-06	0.000506197
LOC103975743	2.67509	5.70978	6.74597e-06	0.000507183
LOC103999252	-2.87428	6.43286	6.89775e-06	0.000516935
LOC103984067	-2.72344	4.5032	6.91217e-06	0.000516935
LOC103995071	-2.51281	2.81793	6.94016e-06	0.000517663
LOC103999937	1.80754	3.50565	6.98772e-06	0.000519842
LOC103995315	2.22226	3.97266	7.07015e-06	0.000524598
LOC103990496	2.09356	5.48261	7.09512e-06	0.000525076
LOC103994171	4.5918	3.66236	7.12337e-06	0.000525794
LOC103978650	-3.39505	4.92792	7.1715e-06	0.000527971
LOC103984858	3.21161	3.77012	7.57365e-06	0.00055558
LOC103990278	-1.34531	5.11467	7.59148e-06	0.00055558
LOC103988864	2.88456	4.0263	7.60532e-06	0.00055558
LOC103975041	1.62848	5.15453	7.64595e-06	0.000557113
LOC103998089	2.72177	6.44297	7.68854e-06	0.000558779
LOC103977847	2.67183	4.88487	7.78859e-06	0.000564603
LOC103999064	2.22592	8.93988	7.86464e-06	0.000568662
LOC104000969	-2.25192	3.42025	7.88673e-06	0.000568808
LOC103988609	2.74591	3.5734	8.00353e-06	0.000575767
LOC103994023	1.59393	4.61386	8.06946e-06	0.000578891
LOC103997060	-1.58443	4.84454	8.08781e-06	0.000578891
LOC103969489	3.06639	6.30541	8.15959e-06	0.000581711
LOC103994872	2.68174	2.88369	8.17144e-06	0.000581711
LOC103975676	2.61818	5.6736	8.19087e-06	0.000581711
LOC103975175	-3.20688	7.52581	8.21908e-06	0.000581711
LOC103977542	3.27456	5.9069	8.22982e-06	0.000581711
LOC103982150	-2.26871	4.98211	8.45095e-06	0.000595855
LOC103973875	3.77148	6.7585	8.54439e-06	0.000600948
LOC103982085	-3.88729	5.93387	8.58758e-06	0.000602491
LOC103979772	2.47068	7.56449	8.64027e-06	0.000604691
LOC103995522	3.75642	7.88294	8.6625e-06	0.000604753
LOC103982005	1.65483	5.30347	8.69939e-06	0.000605836
LOC103982722	-3.37715	6.1275	8.7474e-06	0.000607687
LOC103990982	2.7524	4.49197	8.86823e-06	0.000614575
LOC103970087	2.53417	7.67615	8.90664e-06	0.000615731
LOC103984241	-2.2307	4.42707	9.02524e-06	0.000622412
LOC103986334	2.40464	4.21666	9.12325e-06	0.000627644
LOC103983234	-1.42837	3.85218	9.24104e-06	0.000634208
LOC103987527	3.0742	5.81144	9.3827e-06	0.000642375
LOC103991621	-5.53208	1.07361	9.53846e-06	0.00065095
LOC103979785	3.04994	7.2053	9.55388e-06	0.00065095
LOC103989157	-1.92746	5.50236	9.57946e-06	0.000651128
LOC103992907	1.58795	4.69666	9.66199e-06	0.000655028
LOC103978850	-3.4815	5.7238	9.68306e-06	0.000655028
LOC103972134	1.73091	5.01988	9.7596e-06	0.000657106
LOC103998463	3.99044	3.6371	9.76014e-06	0.000657106
LOC103970762	5.26827	2.54694	9.79483e-06	0.000657878
LOC103982802	-2.86368	8.28246	9.96739e-06	0.000667886
LOC103986939	-1.60507	5.04172	1.00641e-05	0.00067181
LOC103968876	2.48058	5.46729	1.00917e-05	0.00067181
LOC103978171	2.45501	5.51417	1.00971e-05	0.00067181
LOC104000233	3.58032	5.51512	1.02397e-05	0.000679702
LOC103978378	3.16256	2.93978	1.04876e-05	0.000694532
LOC103971310	2.92158	5.59113	1.07598e-05	0.000710522
LOC103983369	-4.91727	4.9409	1.07954e-05	0.000710522
LOC103979803	2.47678	2.31566	1.08064e-05	0.000710522
LOC103968613	1.53484	5.27593	1.08293e-05	0.000710522
LOC103982476	2.90149	4.47074	1.09953e-05	0.00071842
LOC103991151	4.82233	3.40403	1.10004e-05	0.00071842
LOC103986117	1.8765	4.39097	1.10632e-05	0.000718973
LOC103977698	4.23379	5.05319	1.10807e-05	0.000718973
LOC103977235	3.02227	8.14145	1.10849e-05	0.000718973
LOC103974007	3.34031	3.68478	1.11837e-05	0.000723722
LOC103980982	-3.11264	7.40905	1.13861e-05	0.000735145
LOC103991594	2.23651	5.84124	1.17876e-05	0.000759333
LOC103998799	4.81342	4.85001	1.20776e-05	0.000776255
LOC103982689	3.38316	4.8822	1.21193e-05	0.00077717
LOC103998902	-2.6257	5.7963	1.22498e-05	0.000783765
LOC103999038	-2.09762	5.73814	1.22975e-05	0.000785047
LOC103986720	2.00199	5.38309	1.25543e-05	0.000799637
LOC103986973	-7.78478	3.50543	1.25886e-05	0.000800028
LOC103969152	2.26246	6.83292	1.2695e-05	0.000804979
LOC103993361	-2.24342	3.84031	1.27741e-05	0.00080819
LOC103972734	-2.93523	3.31487	1.28241e-05	0.000809544
LOC103972601	1.77106	4.30166	1.30608e-05	0.000822654
LOC103975632	1.99734	6.44323	1.31348e-05	0.000824309
LOC103979354	2.66139	7.25385	1.31452e-05	0.000824309
LOC103988152	2.27462	6.59862	1.31746e-05	0.000824326
LOC103969008	-1.72652	4.69647	1.32258e-05	0.00082571
LOC103986775	2.76119	6.44166	1.33294e-05	0.000830348
LOC103972138	5.35993	2.16096	1.35239e-05	0.000840617
LOC103994515	3.9181	6.10606	1.37e-05	0.000849073
LOC103987157	-2.35173	3.73296	1.37199e-05	0.000849073
LOC103971561	-1.86716	4.91834	1.38697e-05	0.000856475
LOC103995285	2.24936	5.38551	1.43829e-05	0.000886234
LOC103969141	1.63423	9.21391	1.44611e-05	0.000889125
LOC103987864	1.98756	3.71702	1.46453e-05	0.000898498
LOC103992213	3.77788	6.72706	1.47569e-05	0.00090339
LOC103982095	-1.52457	4.25135	1.48242e-05	0.000904576
LOC103984841	2.94704	6.83234	1.48401e-05	0.000904576
LOC104000716	2.60401	3.22577	1.49896e-05	0.000911728
LOC103979709	2.26044	6.68062	1.5371e-05	0.000932922
LOC103974632	-3.14478	5.82321	1.55409e-05	0.000938273
LOC103979408	2.15208	5.37493	1.55479e-05	0.000938273
LOC103970318	3.6753	6.25702	1.55584e-05	0.000938273
LOC103972018	3.2347	4.9009	1.56787e-05	0.000943518
LOC103992860	1.36447	5.54036	1.57829e-05	0.000947778
LOC103987361	2.62546	7.62421	1.58455e-05	0.000949522
LOC103979429	-2.50312	4.74689	1.58872e-05	0.000949671
LOC104000149	1.84752	5.68509	1.5915e-05	0.000949671
LOC103972974	2.97173	2.7366	1.614e-05	0.000961076
LOC103989644	1.69209	7.52758	1.62511e-05	0.000965664
LOC103993595	1.82334	4.45523	1.64203e-05	0.000973676
LOC103968911	-1.63879	8.9764	1.64757e-05	0.000974923
LOC103983577	-2.6044	5.69021	1.65481e-05	0.000977167
LOC103979674	1.38997	4.66899	1.66345e-05	0.000980224
LOC103992049	-2.12763	6.693	1.67061e-05	0.000982402
LOC103999022	1.50944	4.23333	1.68729e-05	0.000990155
LOC103973266	-2.1037	7.7575	1.69694e-05	0.00099376
LOC103987987	1.57697	6.35505	1.7149e-05	0.00100221
LOC103998742	-2.61128	1.84175	1.72408e-05	0.00100544
LOC103969751	-2.74872	5.01977	1.72752e-05	0.00100544
LOC103998607	1.94356	3.75756	1.73454e-05	0.00100745
LOC103969626	5.75445	4.36542	1.75583e-05	0.00101757
LOC103970497	-3.80027	1.66667	1.75914e-05	0.00101757
LOC103985425	1.5531	4.3794	1.8012e-05	0.00103978
LOC103973637	1.38182	5.09709	1.809e-05	0.00104216
LOC103969469	2.40972	3.76704	1.84051e-05	0.00105816
LOC103990446	3.19323	4.63283	1.86853e-05	0.0010721
LOC103983358	2.67438	5.49122	1.87891e-05	0.00107445
LOC103992022	-2.7261	3.02178	1.88021e-05	0.00107445
LOC103992863	3.85636	4.05748	1.89336e-05	0.00107978
LOC103979786	1.23268	5.57338	1.90214e-05	0.00108262
LOC103990566	-1.99214	4.9691	1.91338e-05	0.00108558
LOC103971170	2.12178	3.77596	1.915e-05	0.00108558
LOC103993452	3.65784	7.84188	1.93139e-05	0.00109164
LOC103999170	-3.92006	4.09062	1.9334e-05	0.00109164
LOC103998647	6.1789	0.383852	1.93989e-05	0.00109238
LOC103991862	-2.85476	3.75241	1.94241e-05	0.00109238
LOC103989011	-3.47972	3.78827	1.95242e-05	0.00109583
LOC103992853	-1.47691	5.17782	1.96023e-05	0.00109804
LOC104000693	1.62569	5.33715	1.99391e-05	0.0011147
LOC103974823	3.44935	7.76743	2.00101e-05	0.00111647
LOC103988319	2.42831	1.91835	2.00613e-05	0.00111713
LOC103970894	-1.77248	3.96348	2.01704e-05	0.001121
LOC103993106	2.10741	5.22081	2.04016e-05	0.00113163
LOC103992196	1.54154	4.09587	2.05021e-05	0.00113498
LOC103987775	3.82709	4.88568	2.06054e-05	0.00113848
LOC103980338	-2.33747	3.79158	2.08989e-05	0.00115177
LOC103969123	3.91895	3.28106	2.09399e-05	0.00115177
LOC103985755	-3.76244	2.14727	2.09678e-05	0.00115177
LOC103986808	2.29274	3.1559	2.11879e-05	0.00116009
LOC103990193	3.09576	6.23561	2.12012e-05	0.00116009
LOC103985926	-1.86425	3.40676	2.129e-05	0.0011627
LOC103976025	9.16133	3.23533	2.14936e-05	0.00117157
LOC103978530	-4.33986	3.04073	2.23482e-05	0.00121581
LOC103987931	2.92631	3.15355	2.25249e-05	0.00122275
LOC103998601	4.77305	1.92641	2.25621e-05	0.00122275
LOC103992240	3.41069	4.00623	2.26973e-05	0.00122773
LOC103995837	-2.73577	5.78006	2.29836e-05	0.00124085
LOC104000644	2.74001	4.18373	2.3573e-05	0.00127025
LOC103973363	-1.76851	4.15323	2.36573e-05	0.00127237
LOC103992836	2.72158	3.82066	2.39901e-05	0.00128783
LOC103999765	-2.26152	3.767	2.4118e-05	0.00129225
LOC103978935	1.53012	5.37367	2.48348e-05	0.00132815
LOC103980421	2.0982	7.04984	2.49202e-05	0.0013302
LOC103985045	2.78057	3.53154	2.51409e-05	0.00133946
LOC103979702	-3.45654	3.42216	2.5226e-05	0.00134148
LOC103987552	1.57104	6.86336	2.55004e-05	0.00135353
LOC103980243	2.39748	3.48142	2.6145e-05	0.00138515
LOC103977767	-2.60751	2.64281	2.66101e-05	0.00140716
LOC103972282	2.10275	8.76365	2.68073e-05	0.00141495
LOC103973404	2.19326	3.37904	2.68795e-05	0.00141612
LOC103992289	-1.52103	5.54517	2.74448e-05	0.00144322
LOC103973633	2.22278	2.93533	2.75278e-05	0.0014449
LOC103979034	-2.48249	3.41032	2.76828e-05	0.00144778
LOC103991383	-3.36403	2.01251	2.76847e-05	0.00144778
LOC103980359	-3.16343	2.20558	2.82939e-05	0.00147691
LOC103972802	-3.97398	2.07082	2.85027e-05	0.00148115
LOC103996985	-2.30927	3.38409	2.85409e-05	0.00148115
LOC103987440	1.22582	7.31366	2.85592e-05	0.00148115
LOC103976213	2.31285	4.73065	2.85842e-05	0.00148115
LOC103974331	3.21428	2.25109	2.86881e-05	0.00148382
LOC103997307	-1.81017	6.65269	2.87541e-05	0.00148453
LOC103976182	1.57416	4.28458	2.88709e-05	0.00148785
LOC103977087	1.39893	5.36107	2.90199e-05	0.0014914
LOC103970337	-2.67203	3.11462	2.90451e-05	0.0014914
LOC103972510	-3.46511	1.99817	2.93131e-05	0.00150244
LOC103976991	-2.63958	4.29088	2.96074e-05	0.00151479
LOC103978009	2.29195	2.99484	2.99124e-05	0.00152764
LOC104000137	3.17439	7.30459	3.0039e-05	0.00153134
LOC103985119	-2.95289	4.12621	3.04334e-05	0.00154593
LOC103992381	-2.30253	3.10601	3.04864e-05	0.00154593
LOC103982979	1.83875	2.30896	3.04889e-05	0.00154593
LOC103991201	1.89618	3.99811	3.09102e-05	0.00156333
LOC103991794	-3.5997	1.10081	3.09422e-05	0.00156333
LOC103995072	2.63058	8.14831	3.10119e-05	0.00156406
LOC103976881	1.88648	3.22685	3.11726e-05	0.00156937
LOC103969492	1.63794	5.2495	3.16796e-05	0.00159207
LOC103973602	-1.96085	4.90136	3.19285e-05	0.00160174
LOC103994118	2.62359	4.94099	3.20954e-05	0.00160726
LOC103985700	-2.31067	5.90878	3.24101e-05	0.00162016
LOC103984614	-3.97865	1.55706	3.25552e-05	0.00162455
LOC103987583	1.24399	5.56192	3.26491e-05	0.00162637
LOC103974773	4.57986	5.19926	3.27874e-05	0.0016304
LOC103978205	-1.46817	8.93819	3.31135e-05	0.00164373
LOC103978140	2.80554	9.12283	3.34282e-05	0.00165645
LOC103985536	-2.49875	3.47991	3.38304e-05	0.00167251
LOC103986626	2.87873	4.18248	3.38704e-05	0.00167251
LOC103982840	1.35552	3.57293	3.3976e-05	0.00167306
LOC103968764	1.59589	5.20111	3.4052e-05	0.00167306
LOC103979760	1.81468	3.59432	3.40586e-05	0.00167306
LOC103998366	-4.12833	3.44522	3.43095e-05	0.00168247
LOC103986163	1.77689	5.19675	3.50414e-05	0.00171539
LOC103986671	-2.57829	5.72281	3.51614e-05	0.0017183
LOC103979701	-2.65568	2.94703	3.53116e-05	0.00172267
LOC103979724	2.41147	4.85884	3.54246e-05	0.00172521
LOC103984274	1.22772	6.61661	3.57725e-05	0.00173917
LOC103968967	-4.28009	8.44812	3.60485e-05	0.00174959
LOC103989883	3.6622	3.24986	3.62196e-05	0.00175452
LOC103981940	-1.83133	3.16106	3.63323e-05	0.00175452
LOC103995918	-2.06622	8.78343	3.63358e-05	0.00175452
LOC103988746	-3.251	2.30768	3.64937e-05	0.00175914
LOC103979704	-3.54819	1.32506	3.66451e-05	0.00176344
LOC103978648	-2.42776	5.97372	3.67733e-05	0.00176431
LOC103969558	1.68441	4.61252	3.68086e-05	0.00176431
LOC103970081	2.26306	2.75933	3.68498e-05	0.00176431
LOC103997769	2.83703	3.91932	3.69557e-05	0.00176639
LOC103974643	-2.25379	3.55316	3.73644e-05	0.00177859
LOC103989706	1.81275	8.28144	3.7392e-05	0.00177859
LOC103974343	3.25317	3.12819	3.74587e-05	0.00177859
LOC103971757	2.02609	4.36582	3.74619e-05	0.00177859
LOC103984516	2.60404	8.65239	3.76634e-05	0.00178317
LOC103997157	2.06522	5.18988	3.76842e-05	0.00178317
LOC103987950	-1.75805	5.79645	3.80817e-05	0.00179898
LOC103984991	3.02685	4.15763	3.81653e-05	0.00179969
LOC103987760	-3.776	1.72871	3.82524e-05	0.00179969
LOC103977587	2.33227	5.80561	3.82872e-05	0.00179969
LOC103990816	-2.29644	3.22983	3.84171e-05	0.00180117
LOC103988161	-1.43778	3.9895	3.84457e-05	0.00180117
LOC103973592	2.75009	3.25183	3.93367e-05	0.00183987
LOC103993574	1.78158	4.54817	3.9455e-05	0.00184236
LOC103990784	-1.629	3.24498	3.95512e-05	0.00184381
LOC103984194	4.12865	7.08003	3.97235e-05	0.00184881
LOC103979842	1.69754	2.94256	3.99107e-05	0.00185447
LOC103975272	1.90565	5.61444	4.04062e-05	0.00187443
LOC103998923	-1.95504	2.34988	4.06166e-05	0.0018811
LOC103987573	-2.8381	3.44196	4.08217e-05	0.00188752
LOC103980177	3.36639	1.56427	4.09468e-05	0.00189022
LOC103971627	2.83187	5.50346	4.14311e-05	0.00190947
LOC103982848	-3.84752	8.05718	4.15206e-05	0.00191003
LOC103998093	-2.85264	3.09994	4.1578e-05	0.00191003
LOC103978096	6.28433	2.9533	4.18678e-05	0.00192023
LOC103996619	2.52763	3.76299	4.20513e-05	0.00192553
LOC103993227	2.03886	9.15	4.22838e-05	0.00193305
LOC103998088	2.88167	2.65672	4.25598e-05	0.00194254
LOC104000711	-1.79091	5.41421	4.31188e-05	0.00196321
LOC103996853	2.48305	4.26861	4.31513e-05	0.00196321
LOC103972819	-2.36558	2.50814	4.32653e-05	0.00196524
LOC104000153	-3.98246	1.31537	4.33516e-05	0.00196601
LOC103976748	-3.36689	0.508328	4.34438e-05	0.00196705
LOC103993258	1.64334	6.18706	4.37114e-05	0.001976
LOC103985474	1.57919	4.18306	4.37833e-05	0.0019761
LOC104000388	-2.51481	3.40945	4.41854e-05	0.00199108
LOC103989806	1.49889	5.36857	4.45686e-05	0.00200516
LOC103990702	2.90422	1.15282	4.46441e-05	0.00200538
LOC103996632	1.41727	5.27482	4.47186e-05	0.00200555
LOC103987404	2.29557	2.87811	4.49586e-05	0.00201312
LOC103969045	3.41939	4.87977	4.58404e-05	0.00204937
LOC103991340	1.22607	4.88409	4.63041e-05	0.00206449
LOC103988853	-2.7563	3.7087	4.63772e-05	0.00206449
LOC103984709	4.09989	9.36219	4.63972e-05	0.00206449
LOC103972749	-5.80268	6.76549	4.67498e-05	0.00207615
LOC103979435	2.06752	3.04931	4.68056e-05	0.00207615
LOC103977480	1.29342	5.73677	4.71094e-05	0.00208602
LOC103998260	7.37635	0.352969	4.71755e-05	0.00208602
LOC104000725	4.3318	2.51811	4.75234e-05	0.00209542
LOC103986394	-1.4237	4.43929	4.75636e-05	0.00209542
LOC103973932	4.64023	2.82094	4.76098e-05	0.00209542
LOC103969650	2.49416	6.04764	4.8459e-05	0.00212949
LOC103978408	2.92464	5.58958	4.88909e-05	0.00214515
LOC103997725	-1.91298	3.15268	4.90632e-05	0.00214938
LOC103998772	-1.98612	4.16361	4.93401e-05	0.00215817
LOC104000013	1.76216	3.03347	4.96423e-05	0.00216805
LOC103976319	-3.64427	2.17751	4.97268e-05	0.0021684
LOC103973494	-4.23739	1.21621	4.98766e-05	0.00217158
LOC103996086	2.43464	3.40544	5.00437e-05	0.00217545
LOC103985534	-1.7602	7.95635	5.01188e-05	0.00217545
LOC103998174	1.51974	4.39022	5.03228e-05	0.00218096
LOC103993918	1.96116	3.69787	5.09177e-05	0.00220338
LOC103991767	-2.08907	3.23323	5.13415e-05	0.00221712
LOC103976024	6.14757	6.56161	5.1508e-05	0.00221712
LOC103999071	3.40014	3.6551	5.15487e-05	0.00221712
LOC103991738	-2.32824	2.53625	5.15604e-05	0.00221712
LOC103971845	-1.51366	5.02928	5.16263e-05	0.00221712
LOC103987331	-3.12515	1.85603	5.21463e-05	0.00223606
LOC103995612	-1.14579	4.91887	5.27732e-05	0.00225952
LOC103978718	1.44379	6.24384	5.30023e-05	0.00226591
LOC103986083	2.27665	5.42092	5.30952e-05	0.00226646
LOC103984320	1.50301	5.31536	5.3637e-05	0.00228615
LOC103985668	1.67643	6.12611	5.43319e-05	0.00231229
LOC103969149	2.49345	6.08512	5.49398e-05	0.00233154
LOC103982825	2.49214	2.93002	5.49488e-05	0.00233154
LOC103972162	2.56422	3.13031	5.55609e-05	0.00235399
LOC103980397	2.35937	3.36428	5.56768e-05	0.00235538
LOC103996189	2.65909	2.83508	5.64106e-05	0.00238286
LOC103978838	2.36766	6.36828	5.70184e-05	0.00240403
LOC103991378	1.54328	4.7236	5.70813e-05	0.00240403
LOC103999783	2.0202	4.78966	5.76489e-05	0.00242433
LOC103991148	1.90189	5.56912	5.77881e-05	0.00242658
LOC103968979	2.16966	2.84023	5.82512e-05	0.00244241
LOC103990849	2.81628	5.57914	5.8496e-05	0.00244769
LOC103999121	1.42029	4.83967	5.85498e-05	0.00244769
LOC103983586	-3.08053	1.44839	5.89053e-05	0.00245893
LOC104000682	1.99729	7.05864	5.92043e-05	0.00246777
LOC103976913	-2.61601	4.07089	5.93703e-05	0.00247106
LOC103977949	1.48854	4.76019	5.95286e-05	0.00247402
LOC103990314	1.90151	5.91432	5.9887e-05	0.00248527
LOC104000996	2.80481	3.40567	6.01314e-05	0.00249066
LOC103972834	-2.41051	4.87802	6.01972e-05	0.00249066
LOC103975731	-1.94514	5.72293	6.02806e-05	0.00249066
LOC103972000	2.06046	8.0438	6.0875e-05	0.00251156
LOC103970064	-2.04332	8.84739	6.10755e-05	0.00251617
LOC103987413	2.36519	4.12277	6.13924e-05	0.00252555
LOC103971894	-3.56989	3.00058	6.18675e-05	0.00253802
LOC103980789	1.75463	6.2003	6.19653e-05	0.00253802
LOC103983571	-2.00843	3.66074	6.20164e-05	0.00253802
LOC103987887	1.79907	4.00302	6.20537e-05	0.00253802
LOC103981932	-1.842	6.28387	6.27408e-05	0.00256081
LOC103996888	-1.84284	6.47043	6.27916e-05	0.00256081
LOC103996661	-1.78327	3.33498	6.30674e-05	0.00256685
LOC103987068	-1.89131	9.39392	6.31209e-05	0.00256685
LOC103981948	1.54154	5.77932	6.37817e-05	0.00259001
LOC103976897	-2.52295	3.85281	6.45458e-05	0.00261729
LOC103972299	1.98547	5.23379	6.49245e-05	0.00262889
LOC104000204	-2.0379	3.15376	6.50206e-05	0.00262902
LOC103994135	-1.54939	3.75467	6.51955e-05	0.00263149
LOC103994673	-3.30002	4.94844	6.52674e-05	0.00263149
LOC103995969	-2.9009	6.13117	6.67255e-05	0.00268327
LOC103984941	1.93429	6.1884	6.6741e-05	0.00268327
LOC103987539	3.02713	6.18508	6.70059e-05	0.00268859
LOC103972503	1.38051	4.55592	6.7063e-05	0.00268859
LOC103995597	-3.37265	2.31257	6.82805e-05	0.00273331
LOC103997127	-2.44517	10.4803	6.83713e-05	0.00273331
LOC103994668	-2.36476	3.31713	6.89813e-05	0.00275381
LOC103987882	1.64353	5.03328	6.94829e-05	0.00276994
LOC103978752	2.07877	4.85548	6.99405e-05	0.00278426
LOC103999858	-2.5853	3.48602	7.01679e-05	0.00278939
LOC103968786	2.09743	8.79141	7.15896e-05	0.00284193
LOC103989585	-3.68036	5.92422	7.22967e-05	0.0028635
LOC103981717	6.55648	0.168778	7.23789e-05	0.0028635
LOC103992743	2.31358	3.74099	7.24362e-05	0.0028635
LOC103989499	-8.42045	0.199468	7.2877e-05	0.00287692
LOC103986087	2.55848	3.94472	7.32558e-05	0.00288785
LOC103990260	2.45329	6.15722	7.37835e-05	0.00290461
LOC103999103	2.21153	4.31031	7.42461e-05	0.00291263
LOC103992160	2.27664	8.3522	7.42795e-05	0.00291263
LOC103971400	1.63478	4.21272	7.43736e-05	0.00291263
LOC104001032	2.23256	4.74986	7.45909e-05	0.00291263
LOC103990588	1.81863	7.07805	7.46166e-05	0.00291263
LOC103980830	5.05454	2.45722	7.46198e-05	0.00291263
LOC103975747	1.46851	5.03104	7.48022e-05	0.00291263
LOC103976154	2.41555	7.2274	7.48093e-05	0.00291263
LOC103993985	-2.67416	6.40465	7.53253e-05	0.0029287
LOC103982734	-2.00888	2.81617	7.63679e-05	0.00295963
LOC103984528	2.24791	1.91533	7.66079e-05	0.00295963
LOC103980932	-1.09283	4.68618	7.66621e-05	0.00295963
LOC103985654	1.55609	3.89645	7.67098e-05	0.00295963
LOC103997509	1.85688	5.06877	7.6738e-05	0.00295963
LOC103968801	-3.52393	4.06638	7.67474e-05	0.00295963
LOC103994182	1.4347	5.42578	7.72927e-05	0.00297402
LOC103972246	2.07368	5.35686	7.73304e-05	0.00297402
LOC103983089	-2.40208	4.81447	7.75163e-05	0.00297453
LOC103971204	1.86945	3.52596	7.75536e-05	0.00297453
LOC103968460	1.85641	3.26471	7.90533e-05	0.00302279
LOC103985321	1.64859	7.60494	7.91231e-05	0.00302279
LOC103994440	2.27457	7.73663	7.91316e-05	0.00302279
LOC103996857	2.45408	5.58008	7.95068e-05	0.00302967
LOC103977622	1.85545	5.26934	7.96578e-05	0.00302967
LOC103973049	-1.52862	4.40273	7.9658e-05	0.00302967
LOC103968636	2.11723	6.11947	7.97393e-05	0.00302967
LOC103992098	6.21029	0.27794	7.99497e-05	0.00303359
LOC103978964	2.47789	3.20253	8.07395e-05	0.00305712
LOC103995956	3.25009	3.44588	8.07854e-05	0.00305712
LOC103969560	-1.76075	5.1326	8.10392e-05	0.00306263
LOC103996588	3.52438	5.06726	8.20689e-05	0.00309742
LOC103978080	-1.61865	5.04784	8.27403e-05	0.00311823
LOC103977795	1.45325	5.25969	8.28402e-05	0.00311823
LOC103985721	2.84521	5.64782	8.31242e-05	0.00312477
LOC103985702	1.79606	5.50533	8.37774e-05	0.00314515
LOC103990801	-2.39732	3.19819	8.43297e-05	0.00316169
LOC103975664	2.14885	4.54767	8.4926e-05	0.00317985
LOC103990620	1.67331	7.42602	8.55545e-05	0.00319915
LOC103996796	3.5909	4.11257	8.62832e-05	0.00321975
LOC103985287	-2.02323	4.3913	8.63326e-05	0.00321975
LOC103976030	2.06525	4.76687	8.66919e-05	0.00322606
LOC103975682	-1.45017	6.819	8.67294e-05	0.00322606
LOC103990724	-4.67815	3.08954	8.72093e-05	0.00323966
LOC103978689	-2.85341	1.8933	8.74629e-05	0.00324353
LOC103972249	-4.10246	1.31515	8.75424e-05	0.00324353
LOC103983136	3.52693	5.38963	8.78696e-05	0.0032514
LOC103989512	1.39467	4.67686	8.84459e-05	0.00326846
LOC103969033	2.78404	4.87773	8.89193e-05	0.00328168
LOC103987045	1.81472	5.71623	8.95104e-05	0.0032992
LOC103991490	1.50083	4.7524	9.0408e-05	0.00332667
LOC103989787	4.4257	2.20262	9.04904e-05	0.00332667
LOC103994466	-2.94074	1.17171	9.07424e-05	0.0033285
LOC103983881	-2.67257	3.1235	9.07751e-05	0.0033285
LOC103975867	1.55992	5.22186	9.13635e-05	0.00334575
LOC103991416	1.77585	5.36838	9.17735e-05	0.00335642
LOC103986130	1.57017	3.13246	9.22733e-05	0.00337035
LOC103994129	1.86784	3.07233	9.27215e-05	0.00338236
LOC103998823	1.60881	7.33657	9.32628e-05	0.00339675
LOC103990600	1.80121	3.48821	9.33556e-05	0.00339675
LOC103968531	2.86595	7.70245	9.36144e-05	0.0034018
LOC103970377	3.93467	1.51558	9.48534e-05	0.00344241
LOC103991746	-1.98649	3.0464	9.58464e-05	0.003474
LOC103986532	-2.79479	2.08163	9.60626e-05	0.0034767
LOC103990655	1.93733	3.4373	9.61662e-05	0.0034767
LOC103988981	-3.87411	5.38206	9.63714e-05	0.00347968
LOC103978464	1.26511	5.25356	9.6625e-05	0.0034844
LOC103992370	1.34147	5.27393	9.68411e-05	0.00348776
LOC103986825	-3.44021	8.01015	9.72356e-05	0.00349752
LOC103981386	-2.75391	8.41949	9.83468e-05	0.00353301
LOC103984849	-3.11944	4.11297	9.87112e-05	0.00354161
LOC103969203	1.75582	4.69674	9.89985e-05	0.00354742
LOC103973429	-2.30626	7.26677	9.92604e-05	0.00355232
LOC103969332	1.46232	4.5688	9.95555e-05	0.00355462
LOC103969565	1.8953	3.88882	9.95755e-05	0.00355462
LOC103981690	4.07578	1.45174	0.000100457	0.00358157
LOC103981221	3.50407	4.34938	0.000100945	0.00359445
LOC103993928	-3.59305	3.15209	0.000102395	0.00364153
LOC103975732	2.97351	3.52507	0.000102651	0.00364605
LOC103994191	1.92111	4.18845	0.000102917	0.00365092
LOC103979110	-3.60586	1.55069	0.00010507	0.00372262
LOC103989194	2.55275	6.02452	0.000105271	0.00372508
LOC103997568	1.74663	6.37531	0.000105757	0.00373763
LOC103979990	-3.4984	3.92964	0.000106187	0.00374815
LOC103984675	-4.55423	1.74257	0.000106642	0.00375951
LOC103984666	2.41978	5.37803	0.000107332	0.00377489
LOC103972757	-2.42971	6.96902	0.000107344	0.00377489
LOC103972451	2.3935	3.98473	0.000107931	0.00378626
LOC103977424	-2.60651	4.63391	0.000107935	0.00378626
LOC103993654	1.68257	4.32959	0.000109105	0.0038226
LOC103987200	-1.94766	6.1278	0.000110638	0.0038715
LOC103996870	1.45467	5.73896	0.000110792	0.00387211
LOC103993831	-3.84972	1.68733	0.000111009	0.00387493
LOC103994065	-1.73482	3.58317	0.00011131	0.00388065
LOC104000685	-1.34162	4.53755	0.000112414	0.00391229
LOC103992027	1.39718	4.48181	0.000112621	0.00391229
LOC103979725	2.36265	2.62839	0.000112631	0.00391229
LOC103974862	-2.21348	3.23506	0.000113074	0.00391656
LOC103994204	1.14649	5.32181	0.000113122	0.00391656
LOC103987778	4.70203	3.34952	0.000113183	0.00391656
LOC103986625	4.73215	4.18536	0.000113307	0.00391656
LOC103970138	-2.38484	5.44389	0.000113477	0.00391707
LOC103981969	-1.7235	3.9937	0.000113843	0.00391707
LOC103997441	1.59503	3.80002	0.000113939	0.00391707
LOC103979331	1.87579	7.3357	0.00011395	0.00391707
LOC103977428	-3.87792	2.76953	0.000114013	0.00391707
LOC103970990	1.34619	6.39249	0.000117122	0.00401903
LOC103972080	-1.34361	5.57553	0.000117777	0.00403212
LOC103994594	-1.63032	4.2113	0.000117788	0.00403212
LOC103983670	-1.49987	4.21898	0.000118362	0.00404688
LOC103999409	-2.34375	3.71338	0.000119103	0.0040673
LOC103978943	1.86822	5.92691	0.000119665	0.00408156
LOC103993138	2.38473	7.09624	0.000120526	0.00410599
LOC103979275	2.16826	2.72997	0.000120739	0.0041083
LOC103970434	1.74268	6.45007	0.000121334	0.0041236
LOC103991233	1.59416	3.62096	0.000121917	0.00413845
LOC103982595	2.29455	3.45044	0.000122094	0.00413953
LOC103996618	2.61681	3.02087	0.000123542	0.00418064
LOC103991461	-1.78205	5.74116	0.000123602	0.00418064
LOC103990530	3.10524	3.95741	0.00012441	0.00420296
LOC103975873	2.5782	8.34285	0.000125252	0.00422637
LOC103973880	1.51684	5.62795	0.000125477	0.00422682
LOC103991483	-4.95071	4.86284	0.000125564	0.00422682
LOC103999938	1.52654	5.63207	0.00012591	0.00423346
LOC103997326	-1.53923	3.91317	0.00012774	0.00428531
LOC103991885	-1.17664	4.63579	0.000127755	0.00428531
LOC103978482	2.20978	7.08526	0.000128674	0.00431104
LOC103995787	6.81311	2.82214	0.000129443	0.00433094
LOC103992212	5.97729	5.74031	0.000129574	0.00433094
LOC103978428	-2.4497	9.13908	0.000130001	0.00434012
LOC103975431	-2.23036	5.0508	0.000132189	0.00440797
LOC103983583	-2.81995	1.94326	0.000133494	0.00444625
LOC103985947	2.45128	3.98735	0.000134856	0.00448634
LOC103999627	2.35445	3.801	0.000135441	0.0045005
LOC103968909	1.32622	5.38264	0.000135989	0.00451343
LOC103972823	1.87985	5.54019	0.00013628	0.00451781
LOC103976978	1.57136	5.38308	0.00013732	0.00454697
LOC103986828	-3.34585	7.51812	0.000138253	0.00456893
LOC103971857	-2.66882	3.49138	0.000138306	0.00456893
LOC103973583	2.26648	3.64171	0.000138567	0.00456995
LOC103980500	-1.90588	4.77605	0.000138745	0.00456995
LOC103985376	-1.97661	4.66378	0.000138821	0.00456995
LOC103994568	-3.53473	0.826443	0.000139659	0.00459222
LOC103971122	-3.53344	4.17459	0.000139832	0.00459257
LOC103977939	4.61092	2.0111	0.000140084	0.00459398
LOC103999318	2.72307	3.86937	0.000140409	0.00459398
LOC103995133	-1.99047	2.62819	0.000140435	0.00459398
LOC103986721	-2.47428	4.07663	0.000140625	0.00459398
LOC103993682	1.23569	6.70308	0.000140685	0.00459398
LOC104000780	3.09775	4.9049	0.000141531	0.00461483
LOC103976050	2.10874	3.04124	0.000141874	0.00461483
LOC103984417	2.24944	2.88123	0.000141875	0.00461483
LOC103978707	2.79638	5.22228	0.000141975	0.00461483
LOC103997116	1.05178	5.26452	0.000142605	0.0046298
LOC103983042	-1.83952	4.70717	0.000142762	0.0046298
LOC103988995	-1.54007	5.8355	0.000143101	0.0046355
LOC103991221	-1.41397	6.914	0.000144048	0.00466083
LOC103997348	1.09094	5.94475	0.000144517	0.00467069
LOC103976691	3.13209	4.19208	0.000145696	0.00470343
LOC103979459	1.35201	4.17156	0.000146256	0.00471612
LOC103988030	2.38962	10.4331	0.000146795	0.00472806
LOC103977885	1.8229	5.28168	0.00014696	0.00472806
LOC103989628	1.79552	5.40103	0.000147799	0.00474969
LOC103973725	1.94215	3.59041	0.000148165	0.00475604
LOC103989148	-1.38239	5.2398	0.000148626	0.00476545
LOC103985500	1.76832	3.95096	0.000148905	0.004769
LOC103989634	-4.36076	1.26637	0.000149324	0.00477703
LOC103978888	1.47529	5.865	0.000150048	0.00479476
LOC103968939	1.53872	3.50005	0.000153746	0.00490731
LOC103987982	2.67541	4.13724	0.000154019	0.00490731
LOC103980093	2.40099	3.4281	0.000154089	0.00490731
LOC103973426	1.88098	7.75692	0.000155195	0.00493698
LOC103984678	1.63355	5.0601	0.000155683	0.00494694
LOC103979080	1.63465	8.7047	0.000156164	0.00495061
LOC103979886	-2.7114	6.51917	0.000156221	0.00495061
LOC103979771	1.91784	8.3075	0.000156322	0.00495061
LOC103972086	1.6929	3.60949	0.000156949	0.00496492
LOC103999912	-1.42899	5.85072	0.000158743	0.00501297
LOC103971309	-2.39772	2.92087	0.000158822	0.00501297
LOC103980267	2.01429	7.20147	0.000159183	0.0050145
LOC103989449	1.90389	4.73517	0.000159263	0.0050145
LOC103990310	2.51711	5.1685	0.000159401	0.0050145
LOC103974656	3.77943	6.94503	0.000160586	0.00504616
LOC103976764	2.27783	3.89893	0.000161254	0.00505977
LOC103986791	-3.09129	3.08517	0.00016139	0.00505977
LOC103982434	1.88546	5.61843	0.000161554	0.00505977
LOC103971641	-1.76661	4.10224	0.000162352	0.00507915
LOC103984195	1.8601	7.11561	0.000162765	0.00508644
LOC103991861	-2.09685	5.77977	0.000163518	0.00510437
LOC104000485	1.70099	5.34577	0.000164206	0.00512021
LOC103995943	-1.76487	5.3787	0.000164541	0.00512501
LOC103991704	1.32853	5.91162	0.000165688	0.00515506
LOC103968450	1.38784	5.36083	0.000166068	0.00516122
LOC103971402	1.62989	5.55313	0.000166417	0.00516555
LOC103981796	3.41522	6.46471	0.000166572	0.00516555
LOC103975976	-2.24634	4.53622	0.000166769	0.00516602
LOC103980348	-2.36231	5.73951	0.000167541	0.00518426
LOC103985656	3.20892	3.50689	0.000168238	0.00520016
LOC103978190	1.66789	6.88566	0.000170734	0.00527156
LOC103986303	1.78822	5.08038	0.000171725	0.00529639
LOC103993277	1.74241	6.67737	0.00017219	0.00530495
LOC103971987	1.70656	5.00251	0.000173353	0.00533498
LOC103995448	1.74498	9.02383	0.000174309	0.00535857
LOC103980004	1.85948	3.57121	0.000174708	0.00536504
LOC103993419	2.09908	5.22974	0.000175516	0.00537722
LOC103988178	2.98489	6.59618	0.000175577	0.00537722
LOC103970244	2.03875	3.1158	0.000175762	0.00537722
LOC103971871	-1.60619	5.22811	0.000175864	0.00537722
LOC104000595	-2.2214	4.78082	0.000176643	0.00539132
LOC103998565	-1.80773	4.66611	0.000176705	0.00539132
LOC103994849	2.73107	2.47165	0.000177619	0.00541336
LOC103988263	-4.89487	2.75794	0.000178351	0.00542985
LOC103988482	2.80977	5.46784	0.000178729	0.00543552
LOC103983594	1.48743	7.35111	0.000179452	0.00544902
LOC103991408	2.89059	5.71924	0.000179558	0.00544902
LOC103991216	-1.56788	6.55696	0.000180766	0.00547983
LOC103983690	1.86342	4.13522	0.000181528	0.00549705
LOC103973260	-3.10947	1.89564	0.000182497	0.0055205
LOC103991664	1.56527	7.01107	0.000182845	0.00552511
LOC103978784	3.04145	5.07539	0.000183303	0.00553307
LOC103981329	1.79066	4.08433	0.000183963	0.00554707
LOC103983955	1.66141	5.2554	0.00018539	0.00558041
LOC103991494	-1.65394	3.97558	0.000185462	0.00558041
LOC103982126	-1.63192	6.44691	0.000186124	0.00559438
LOC103982806	-4.06572	7.12496	0.000186562	0.0056016
LOC103991250	-2.0236	4.28217	0.000186964	0.00560309
LOC103993373	1.53224	5.35433	0.000187007	0.00560309
LOC103999157	2.25054	2.36459	0.000187312	0.00560632
LOC103980916	-1.87678	4.5555	0.000188729	0.00564277
LOC103975789	1.57383	7.22245	0.000189004	0.00564503
LOC103973951	5.71879	0.0267619	0.000190353	0.00567932
LOC103997755	2.19836	3.40034	0.000191353	0.00570317
LOC103989479	-2.57635	2.80022	0.000191562	0.00570339
LOC103975839	-3.63185	0.265165	0.00019202	0.00570845
LOC103999145	-2.19747	1.82156	0.000192315	0.00570845
LOC103997719	-2.05124	6.38771	0.000192336	0.00570845
LOC103989056	2.07446	3.63391	0.000194805	0.00577569
LOC103985501	1.32708	4.39992	0.000195408	0.00578752
LOC103968723	1.57594	6.05053	0.000195958	0.00579775
LOC103969465	2.71725	4.76425	0.000196243	0.00580013
LOC103988275	4.44681	6.12183	0.00019648	0.00580013
LOC104000856	-1.72512	7.00331	0.000196653	0.00580013
LOC103995799	2.06037	5.16205	0.000197877	0.00583017
LOC104000990	3.63813	3.16449	0.000199444	0.00587025
LOC104000868	-1.69851	4.02108	0.00019973	0.00587257
LOC103994410	1.52497	4.09873	0.000200406	0.00588633
LOC103986134	1.45017	4.91309	0.00020076	0.00589064
LOC103992688	-1.38209	4.48873	0.000201138	0.00589562
LOC103991603	2.33893	4.23874	0.000202303	0.00591693
LOC103979001	3.26031	3.74712	0.000202482	0.00591693
LOC103996360	-3.03969	3.5926	0.000202492	0.00591693
LOC103974498	1.38064	4.30842	0.000203134	0.00592959
LOC103990853	1.66848	7.27539	0.000203762	0.00593794
LOC103971097	-2.19845	5.97454	0.000203839	0.00593794
LOC103975251	-1.46864	3.4496	0.000205479	0.00597957
LOC103986818	1.72336	4.25257	0.000207796	0.00604078
LOC103979291	3.813	8.38221	0.000209972	0.0060978
LOC103970791	5.0081	1.41732	0.000210566	0.00610879
LOC103986657	2.101	6.01913	0.000211053	0.00611664
LOC103969695	1.41551	4.90603	0.000211395	0.0061203
LOC103987336	3.22698	3.88718	0.00021164	0.00612113
LOC103996704	1.62469	3.30627	0.000213629	0.00617237
LOC103992203	-2.63457	2.84423	0.000214003	0.00617689
LOC103977327	1.93719	3.40112	0.000214224	0.00617698
LOC103996539	1.96683	4.79105	0.00021522	0.00619938
LOC103993306	1.73183	4.13448	0.000216377	0.00622619
LOC103983044	-2.53428	3.40266	0.00021659	0.00622619
LOC103999307	-2.22544	4.32908	0.000218865	0.00628523
LOC103981321	-3.98527	1.50603	0.000219489	0.00629675
LOC103977657	1.99038	6.82163	0.000221065	0.00633555
LOC103993537	-1.40189	7.10602	0.000221413	0.00633913
LOC103973825	-2.87748	1.37679	0.000221642	0.00633926
LOC104001035	-2.67284	2.32848	0.00022364	0.00638998
LOC103988229	2.25259	5.69766	0.000225175	0.00642707
LOC103993699	2.33482	3.30524	0.000225392	0.00642707
LOC103989843	3.50852	3.50595	0.000226362	0.00644824
LOC103968983	1.55797	4.86053	0.000227782	0.00648217
LOC103971078	3.55734	6.57545	0.000229399	0.00652164
LOC103996510	1.58682	5.89498	0.000230057	0.00653289
LOC104000954	1.60431	4.36016	0.000230397	0.00653289
LOC104000415	-1.23062	4.39816	0.000230486	0.00653289
LOC103971061	-2.17511	4.25589	0.000230807	0.00653545
LOC103980911	1.53292	3.38955	0.000231156	0.00653882
LOC103983914	2.70205	4.31248	0.000232	0.00655614
LOC103988626	2.9294	4.40026	0.000233017	0.00657277
LOC103996928	2.06447	7.1311	0.000233052	0.00657277
LOC103997576	3.19716	8.04815	0.000234847	0.00661681
LOC103980704	1.65677	6.05186	0.000237362	0.00668103
LOC103994722	-1.35172	3.95912	0.000239411	0.00673201
LOC103992064	-1.22764	6.64032	0.000239985	0.00674147
LOC103986869	1.63638	3.99808	0.000241952	0.00678999
LOC103980728	-1.80969	4.9407	0.000243807	0.00683528
LOC103980286	-2.26691	2.78655	0.000244241	0.00683659
LOC103968874	1.38746	4.34081	0.00024468	0.00683659
LOC103990305	-2.69507	5.90742	0.000244693	0.00683659
LOC103981394	-1.61981	6.33508	0.000244819	0.00683659
LOC103983018	1.37857	5.73824	0.000246122	0.00686622
LOC103984620	2.05682	2.52078	0.000246552	0.00686985
LOC104000318	2.26044	4.88802	0.000246737	0.00686985
LOC103997918	2.18916	6.01889	0.000247068	0.00687232
LOC103986322	2.46503	3.69333	0.000248032	0.00689236
LOC103987965	1.70064	3.579	0.000249059	0.00691413
LOC103993551	2.66303	7.54191	0.000249929	0.0069315
LOC103968758	2.17609	3.91748	0.000250543	0.00694173
LOC103989987	1.36054	6.00745	0.000251728	0.00696611
LOC103986936	-3.05369	2.61118	0.000251915	0.00696611
LOC103973556	2.35116	2.25198	0.0002524	0.00697274
LOC103992290	-2.40102	3.43473	0.000253398	0.00699349
LOC103969282	2.79639	8.22519	0.000253896	0.00700042
LOC103989258	-1.7621	3.46167	0.000255143	0.00702797
LOC103999649	1.87723	3.31505	0.000255507	0.00703116
LOC103996030	2.5444	2.70673	0.000255879	0.00703456
LOC103979345	-2.2213	1.77706	0.000256537	0.00704583
LOC103974217	3.19186	3.49094	0.00025824	0.00708573
LOC103969184	-3.39972	1.70539	0.000260345	0.00713509
LOC103971273	1.34252	6.40506	0.000260543	0.00713509
LOC103989652	1.61837	5.55149	0.000261861	0.00715723
LOC103989334	-1.35291	6.36037	0.000261961	0.00715723
LOC103992782	-2.58868	2.20484	0.000262108	0.00715723
LOC103987840	1.90725	6.36418	0.000263012	0.007175
LOC103995028	2.01413	9.08917	0.000264017	0.00719547
LOC103994690	-2.23104	2.71498	0.000265174	0.00721511
LOC103991696	2.5335	6.17529	0.000265246	0.00721511
LOC103997149	-3.47584	5.13551	0.000266516	0.0072427
LOC103997359	-2.15477	6.17514	0.000269351	0.00731273
LOC103998692	1.39519	3.35518	0.000270228	0.0073295
LOC103972396	1.23142	4.77977	0.000271307	0.00735174
LOC103979993	1.37428	4.20498	0.000272786	0.00738476
LOC103970753	-2.00799	3.28946	0.000275509	0.00744958
LOC103981105	2.70712	2.18282	0.000275706	0.00744958
LOC103996942	4.38222	4.32293	0.000277552	0.00749233
LOC104000872	1.30915	5.3553	0.000278112	0.0075003
LOC103983037	1.81108	4.13704	0.000279353	0.00752406
LOC103998098	-2.71607	3.21914	0.000279559	0.00752406
LOC103993215	2.14055	4.5893	0.00027979	0.00752406
LOC103973039	1.42876	5.45085	0.000281515	0.00755095
LOC103970465	-2.1419	6.49414	0.000281534	0.00755095
LOC103979101	1.4344	5.12457	0.000281597	0.00755095
LOC103968473	-2.3983	3.85318	0.000281855	0.00755095
LOC103996042	2.21058	5.92736	0.000283725	0.0075911
LOC103988836	1.31892	4.65019	0.00028389	0.0075911
LOC103977369	1.83993	5.01007	0.00028479	0.00760799
LOC103984224	-2.01247	6.22894	0.000286592	0.00764459
LOC103986081	4.24327	5.0264	0.000286788	0.00764459
LOC103970058	1.3849	9.10676	0.000287112	0.00764459
LOC103995332	1.89439	4.25713	0.000287238	0.00764459
LOC103980002	-1.1282	5.2792	0.000290947	0.00773602
LOC103979055	2.14861	3.8036	0.000291639	0.00774716
LOC103987881	1.64208	4.18155	0.000292498	0.0077627
LOC103986371	1.46993	7.20288	0.000293121	0.00777197
LOC103984863	-1.52422	4.70146	0.000294191	0.00779302
LOC103989994	-2.50993	5.15225	0.000296923	0.00785807
LOC103980373	-1.59024	5.11617	0.00029748	0.00786547
LOC103973230	-5.82227	2.61769	0.000297994	0.0078717
LOC103993314	2.45056	2.10251	0.000299576	0.00790389
LOC103991591	2.50571	5.98399	0.00029977	0.00790389
LOC103970417	3.38119	3.33243	0.000300677	0.00792045
LOC103993774	1.1789	4.62915	0.000301544	0.0079359
LOC103985349	-1.80094	3.07716	0.000302484	0.00794903
LOC103989127	1.89092	3.92711	0.000302604	0.00794903
LOC103985630	2.67375	2.10896	0.000303132	0.00795553
LOC103998863	1.40488	5.17066	0.000303454	0.00795663
LOC103968781	-1.50456	4.74708	0.000304593	0.0079791
LOC103991692	2.82782	3.40573	0.000306656	0.00802572
LOC103996176	1.62318	3.51495	0.000308046	0.00805328
LOC103987927	1.80539	4.88194	0.000308277	0.00805328
LOC103997996	1.27452	4.87744	0.000308827	0.00805836
LOC103983959	2.41249	3.34652	0.00030904	0.00805836
LOC103997618	2.64687	9.90309	0.000310274	0.00808308
LOC103982087	-1.39074	5.84084	0.000312078	0.00812261
LOC103984249	1.28293	6.42823	0.000312396	0.00812344
LOC103973127	2.51681	2.7143	0.000313993	0.00815749
LOC103997253	3.89195	0.300033	0.000314397	0.0081605
LOC103997814	1.96973	4.23757	0.000316087	0.00819428
LOC103989537	-3.29592	4.5558	0.000316415	0.00819428
LOC103987569	-2.99481	3.81374	0.000316566	0.00819428
LOC103978456	1.07658	5.24586	0.000317105	0.00820074
LOC103986628	-1.98461	4.67724	0.000317828	0.00821197
LOC103970494	9.84106	0.348596	0.000318234	0.00821496
LOC103999521	2.38514	3.67338	0.000320388	0.00826305
LOC103994660	2.05472	5.90646	0.000321096	0.00827378
LOC103971003	-3.20274	1.87933	0.000321611	0.00827951
LOC103984122	1.30584	5.08871	0.000327742	0.00842969
LOC103972202	-4.70069	5.85985	0.000328096	0.00843114
LOC103974355	-2.13534	3.30178	0.000329187	0.00845151
LOC103987782	1.78719	4.09726	0.000330332	0.00847323
LOC103978400	1.92592	8.19635	0.000330864	0.00847922
LOC103988875	-1.82599	4.13217	0.000332708	0.00851877
LOC103989306	-2.0111	7.97097	0.000333195	0.00852353
LOC103999747	-2.72338	3.96351	0.000333859	0.00853281
LOC103997039	-3.89888	3.44519	0.000334355	0.00853779
LOC103993084	1.83603	3.59005	0.000334827	0.00854215
LOC103978309	1.92148	4.01984	0.000336199	0.00856944
LOC103987194	3.68412	3.56366	0.000336845	0.00857819
LOC103980317	-2.36778	4.0629	0.000337961	0.00859888
LOC103975148	-2.49485	7.36241	0.000338816	0.00861292
LOC103978619	-3.42939	4.465	0.000340186	0.00864
LOC103978582	1.66246	6.05327	0.000344373	0.00873851
LOC103985798	-2.16464	2.9414	0.000344683	0.00873854
LOC103987459	1.61467	4.66417	0.000346902	0.00878695
LOC103979662	-2.91542	1.85985	0.000348956	0.00883109
LOC103991226	-2.89518	1.54349	0.000354475	0.00896135
LOC103991463	2.12988	7.1829	0.000354893	0.00896135
LOC103986840	2.78348	0.739975	0.000355096	0.00896135
LOC103996553	1.41477	3.22463	0.000355368	0.00896135
LOC103982748	-4.01178	1.28852	0.000356092	0.00897163
LOC103996799	-1.98732	2.35778	0.000358021	0.00901221
LOC103985199	2.35648	2.00713	0.000359919	0.009044
LOC103981268	1.47026	6.08374	0.000360098	0.009044
LOC103997005	-1.63065	3.60314	0.000360326	0.009044
LOC104000502	-2.10654	2.95508	0.00036056	0.009044
LOC103978963	1.41229	7.60432	0.00036208	0.00907031
LOC103974566	-1.99205	2.49029	0.000362249	0.00907031
LOC103989185	-3.7814	0.459473	0.000364431	0.00911688
LOC103992513	1.63837	5.17105	0.000364976	0.00912246
LOC103971462	7.07703	4.74824	0.00036834	0.00919843
LOC103968446	1.81211	4.78574	0.000368791	0.00919949
LOC103991639	2.85794	6.32944	0.00036947	0.00919949
LOC103998590	-1.33739	4.38505	0.000369521	0.00919949
LOC103986780	-3.67913	5.21858	0.00036968	0.00919949
LOC103984626	1.76595	3.96309	0.000371726	0.00923704
LOC103987538	-2.22532	1.46463	0.000371841	0.00923704
LOC103993842	1.22958	4.83241	0.000372613	0.00924811
LOC103972569	3.3376	2.08184	0.00037387	0.00927119
LOC103986095	2.47034	2.50645	0.000375713	0.00930874
LOC103994585	1.49341	4.74975	0.000381551	0.00944514
LOC104000867	-1.18505	6.41388	0.000382492	0.0094478
LOC103969490	-1.09988	7.03643	0.000382877	0.0094478
LOC103992646	1.86916	5.12825	0.000382879	0.0094478
LOC103985192	2.32872	7.00134	0.000382992	0.0094478
LOC103992179	2.84356	5.72091	0.000383346	0.00944832
LOC103982461	4.12391	4.7528	0.000385242	0.0094868
LOC103994828	-1.65558	3.14353	0.000385986	0.00949686
LOC103979146	-2.12595	5.27221	0.000389783	0.00958197
LOC103999549	1.95304	4.4003	0.000390759	0.00959763
LOC103970718	2.15459	2.72952	0.000391542	0.00960854
LOC103987009	1.71096	4.18605	0.000392311	0.00961908
LOC103973733	-2.34362	4.78338	0.000393214	0.00962977
LOC103980181	3.23474	6.11682	0.000393426	0.00962977
LOC103994956	-2.24631	5.0602	0.000394071	0.00963723
LOC103993278	-4.08367	3.27414	0.000396009	0.00967344
LOC103986598	2.00489	4.51438	0.000396998	0.00967344
LOC103998271	3.15134	1.3642	0.000397484	0.00967344
LOC103984934	1.85824	4.76523	0.000397519	0.00967344
LOC103969641	1.21316	4.88066	0.000397566	0.00967344
LOC103995152	1.83385	4.81469	0.00039777	0.00967344
LOC103996829	-3.41805	4.21591	0.000397941	0.00967344
LOC103996353	-3.81371	0.782557	0.000398431	0.00967706
LOC103972991	-2.24088	2.66222	0.000399125	0.00968562
LOC103995455	1.94126	8.00378	0.000399818	0.00969414
LOC103986372	1.63025	5.31623	0.000400378	0.00969941
LOC103982929	-2.18367	2.8522	0.000400725	0.00969952
LOC104000651	-1.32109	5.19632	0.000401622	0.00971295
LOC103969227	-1.63372	4.19821	0.000402357	0.00972244
LOC103973002	-2.27542	4.21052	0.000403634	0.00974497
LOC103984728	-1.96775	8.21817	0.000404297	0.00975267
LOC103993813	-1.6159	5.96383	0.000406431	0.00978483
LOC103982732	-2.96808	3.86504	0.000406897	0.00978483
LOC103972431	1.55603	6.46968	0.000407031	0.00978483
LOC103981942	-3.29397	8.42958	0.000407237	0.00978483
LOC103968458	3.58563	4.43931	0.000407356	0.00978483
LOC103969616	1.69053	3.1697	0.000408071	0.00978778
LOC103978414	-1.69213	3.58819	0.000408169	0.00978778
LOC103968851	1.93037	6.15369	0.000408958	0.00979839
LOC103981004	-6.94019	-1.23377	0.000412378	0.00987198
LOC103968610	3.62667	0.735395	0.000412953	0.00987283
LOC103981206	-1.3449	5.3629	0.000413319	0.00987283
LOC103987579	1.62499	4.02598	0.000413458	0.00987283
LOC103974933	-1.56605	6.25729	0.000414359	0.00988168
LOC103971318	-2.16305	7.1498	0.000414526	0.00988168
LOC103993474	2.41895	3.52678	0.000415437	0.00989508
LOC103999053	1.58838	7.16806	0.000415843	0.00989644
LOC103993340	-1.42163	4.39201	0.00041675	0.00990969
LOC104000302	1.7377	4.31359	0.000418704	0.00993076
LOC103982773	4.74297	1.36797	0.000418838	0.00993076
LOC103995772	1.61395	5.03439	0.000418961	0.00993076
LOC103984281	1.44173	5.14131	0.000419316	0.00993076
LOC103998099	-1.92817	4.73591	0.000419387	0.00993076
LOC103977988	1.76861	4.02	0.000420807	0.00995604
LOC103968987	1.5361	4.49734	0.000421188	0.00995675
LOC103979537	2.13036	4.14745	0.000421893	0.00996512
LOC103984510	-1.98331	5.17803	0.000422452	0.00997
LOC103987264	1.87492	5.00776	0.00042493	0.0100201
LOC103989851	-5.32976	2.921	0.00042684	0.0100568
LOC103992899	3.19841	6.30856	0.000427642	0.0100592
LOC103983103	-2.67874	3.97892	0.000427649	0.0100592
LOC103969674	3.57529	1.12562	0.000430589	0.0101194
LOC103992380	2.20351	4.42915	0.000430924	0.0101194
LOC103987822	-3.01165	6.12121	0.00043235	0.0101445
LOC104000801	4.55875	3.79785	0.000433933	0.0101732
LOC103980740	-1.92815	5.87215	0.000434697	0.0101827
LOC103989037	3.04605	8.94409	0.000435821	0.0101946
LOC103977511	-3.68772	1.5519	0.000435924	0.0101946
LOC103996311	3.14019	3.63135	0.000436651	0.0102032
LOC103982730	-2.24267	2.77617	0.000438388	0.0102353
LOC103969146	2.15781	5.21897	0.000438839	0.0102374
LOC103982502	-1.16404	5.17797	0.000439848	0.0102525
LOC103971288	2.63212	2.57586	0.000443625	0.010332
LOC103974948	-2.84731	6.64062	0.00044673	0.0103958
LOC103999470	-1.37958	4.66512	0.000453503	0.0105448
LOC103991926	1.5906	5.9688	0.000454051	0.0105489
LOC103981844	-1.89021	8.05074	0.00045459	0.0105527
LOC103991413	2.89373	3.41846	0.000455692	0.0105697
LOC103999910	-1.32763	5.05211	0.000456128	0.0105711
LOC103995030	-1.95337	2.79937	0.000457725	0.0105995
LOC103995798	-2.17193	7.46274	0.00045873	0.0106141
LOC103988323	-1.54356	3.83697	0.000460341	0.0106427
LOC103975343	2.58851	1.29342	0.000462722	0.010689
LOC103972530	1.97118	1.89249	0.000463123	0.0106895
LOC103971827	1.48319	3.09556	0.000465132	0.0107272
LOC103983858	4.10003	3.3729	0.000466685	0.0107543
LOC103996692	1.7602	4.61985	0.000468042	0.0107768
LOC103980316	-1.88316	3.18823	0.000472999	0.0108753
LOC103994519	-4.90278	1.91398	0.000473089	0.0108753
LOC103989735	-2.83049	3.31014	0.000474785	0.0109054
LOC103999593	-1.60321	3.51627	0.000477928	0.0109687
LOC103968567	3.15083	6.71703	0.000478939	0.010983
LOC103981246	2.55386	2.78056	0.000479535	0.0109878
LOC103980891	-1.70237	3.49147	0.000480759	0.011007
LOC103979328	-1.32567	5.04878	0.000481661	0.0110147
LOC103993507	1.39898	4.36409	0.000482076	0.0110147
LOC103969605	-3.374	2.97102	0.000482534	0.0110147
LOC103980939	-1.62458	3.79157	0.000482649	0.0110147
LOC103996605	-1.30285	6.98605	0.000483571	0.0110268
LOC103978063	-4.42888	-0.0737598	0.000485355	0.0110464
LOC103986206	1.45985	6.93241	0.000485502	0.0110464
LOC103985402	-1.12465	4.79863	0.000485599	0.0110464
LOC103976901	2.77931	7.86834	0.000488	0.0110839
LOC103980923	2.08785	6.18586	0.000488165	0.0110839
LOC103970898	-1.61447	6.0933	0.000488419	0.0110839
LOC103984639	2.95702	1.44224	0.00048944	0.0110955
LOC103982080	2.55504	5.63623	0.000489714	0.0110955
LOC103970202	1.55143	5.445	0.000492306	0.0111399
LOC103985050	1.94902	1.72322	0.000492461	0.0111399
LOC103998451	-6.59605	-0.591011	0.0004944	0.0111749
LOC103998985	4.6445	2.9179	0.000494937	0.0111781
LOC103973274	1.58607	4.42584	0.000495529	0.0111825
LOC103971524	-1.1596	4.88507	0.000496714	0.0112004
LOC103980915	-1.76531	7.20418	0.000498617	0.0112294
LOC103975043	1.48027	4.76103	0.000498796	0.0112294
LOC103982473	1.3796	3.79513	0.000500046	0.0112486
LOC103981082	1.59011	5.09721	0.000502853	0.0113028
LOC103974001	-2.08755	3.60729	0.000505535	0.0113541
LOC103987105	-1.56291	5.13765	0.000506421	0.011365
LOC103978950	1.8291	3.2445	0.000507484	0.0113798
LOC103990987	-1.72725	6.16621	0.000508198	0.0113869
LOC103975060	1.28877	4.54753	0.000509737	0.0114123
LOC103975826	2.41056	8.53399	0.00051066	0.0114239
LOC103990764	-1.42682	4.51193	0.000511797	0.0114404
LOC103990368	-3.29387	5.64464	0.000514269	0.0114866
LOC103992718	-2.61523	4.40499	0.000515283	0.0114964
LOC103998183	-1.70788	6.29146	0.000515519	0.0114964
LOC103985274	2.69055	2.70019	0.00052031	0.0115941
LOC103983074	2.15695	4.72657	0.000523736	0.0116612
LOC103976855	1.20726	4.7384	0.00052446	0.0116682
LOC103975453	3.1937	1.23235	0.0005255	0.0116822
LOC104000632	1.48304	5.48531	0.000526623	0.011698
LOC103995502	2.25748	2.12635	0.000527764	0.0117141
LOC103979546	1.69203	6.58384	0.000531197	0.0117811
LOC103990309	1.92068	3.66339	0.000532599	0.011803
LOC103982932	-2.16498	1.88239	0.000533567	0.0118152
LOC103980599	-3.61702	2.40042	0.000536436	0.0118694
LOC103992489	2.94412	5.38521	0.000537347	0.0118803
LOC103992285	1.80316	4.5041	0.000538327	0.0118927
LOC103976739	2.39956	4.71464	0.000538872	0.0118955
LOC103986118	1.88113	8.4835	0.000540561	0.0119155
LOC103979477	1.52862	4.65096	0.000540619	0.0119155
LOC103970162	1.28746	5.41583	0.000543068	0.0119602
LOC103997919	2.97881	3.70743	0.000546069	0.0120169
LOC103971716	1.02633	4.67037	0.000547411	0.0120371
LOC103990634	-2.08414	2.27461	0.000549323	0.0120698
LOC103971038	2.92051	3.10521	0.00055084	0.0120937
LOC103995808	1.80061	5.09906	0.000552003	0.0121056
LOC103990040	-2.18508	6.12831	0.000552654	0.0121056
LOC103998544	-1.62638	5.93872	0.000552662	0.0121056
LOC103982345	-3.01443	5.66598	0.000553764	0.0121204
LOC103994631	1.42446	4.89915	0.000554231	0.0121212
LOC103971011	1.59142	7.02415	0.000555789	0.0121459
LOC103996643	-1.35672	4.20721	0.000557012	0.0121627
LOC103968553	4.39967	5.38045	0.000557413	0.0121627
LOC103983474	-4.50723	-0.0703967	0.000557929	0.0121646
LOC103974546	-1.60244	7.30987	0.000558549	0.0121687
LOC103991285	-1.25911	4.75017	0.000560592	0.0121971
LOC103997534	-2.24106	8.44655	0.000560713	0.0121971
LOC103985414	-2.21147	6.02517	0.000561694	0.0122091
LOC104000138	1.48286	5.14981	0.000562833	0.0122164
LOC103997013	1.9124	2.88423	0.000562892	0.0122164
LOC103995569	1.39613	3.33892	0.000565028	0.0122534
LOC103983785	1.5717	4.59558	0.000565839	0.0122597
LOC103989347	-2.95347	2.22677	0.000566184	0.0122597
LOC103969221	2.09841	2.13037	0.000567551	0.0122799
LOC103974369	-1.95679	3.94892	0.000568177	0.0122841
LOC103994514	1.69913	3.68361	0.000568614	0.0122841
LOC103979684	-1.42718	6.91333	0.000573258	0.0123657
LOC103975508	-3.10444	1.00996	0.000573263	0.0123657
LOC103973859	1.7085	4.21107	0.000574103	0.0123744
LOC103980970	1.27865	5.29448	0.000575399	0.0123929
LOC103975961	1.37845	4.23811	0.000578555	0.0124339
LOC103995591	2.0945	3.1443	0.000578589	0.0124339
LOC103997909	-2.46039	6.18975	0.000578942	0.0124339
LOC103977240	-7.04612	-0.615981	0.000579057	0.0124339
LOC103995622	2.46933	3.71697	0.000581788	0.0124831
LOC103975689	-1.19127	5.03486	0.0005828	0.0124835
LOC103985989	1.27948	4.80445	0.000583139	0.0124835
LOC103997480	1.10934	6.3407	0.000583439	0.0124835
LOC103993991	-1.67206	3.18496	0.000583566	0.0124835
LOC103988382	6.36423	0.409186	0.000584304	0.0124898
LOC103996641	1.39006	6.35168	0.000585493	0.0124958
LOC103999772	1.43386	4.58714	0.000585709	0.0124958
LOC103996200	1.55546	7.10648	0.000586265	0.0124958
LOC103974102	1.75373	4.46606	0.000586347	0.0124958
LOC103985241	6.99143	0.896796	0.000588373	0.0125216
LOC103985768	-4.1625	2.37025	0.000588443	0.0125216
LOC103990369	-1.56588	3.65763	0.000589169	0.0125277
LOC103972108	1.11555	6.32279	0.000589911	0.0125341
LOC103994056	1.90289	3.20868	0.000591345	0.0125551
LOC103977443	-1.39346	3.55517	0.000594634	0.0126155
LOC103987641	1.48969	6.10134	0.000596779	0.0126475
LOC103986038	-1.56457	6.2215	0.000597034	0.0126475
LOC103975680	-1.60721	5.18717	0.000598322	0.0126582
LOC103978326	-2.60831	3.38926	0.000599137	0.0126582
LOC103989565	1.89143	4.43697	0.000599308	0.0126582
LOC103993318	-1.18379	5.00965	0.000599328	0.0126582
LOC103971925	2.49416	3.31517	0.000600775	0.0126794
LOC103984740	1.98277	3.80618	0.000601456	0.0126804
LOC103979658	2.27771	6.05135	0.000601717	0.0126804
LOC103992705	-1.22973	4.6267	0.000604517	0.0127281
LOC103996638	-1.79842	2.79281	0.000604882	0.0127281
LOC103996156	2.30144	5.1277	0.000613712	0.0129044
LOC103969795	5.48608	-0.0115894	0.000614958	0.012921
LOC103975306	2.27318	8.3532	0.000617328	0.0129611
LOC103978243	2.54579	5.76234	0.000621576	0.0130359
LOC103991634	1.32977	5.17247	0.000622149	0.0130359
LOC103988757	-1.53863	3.90397	0.000622629	0.0130359
LOC103976086	-1.30866	3.78455	0.000622727	0.0130359
LOC103991736	2.10324	4.07715	0.000623781	0.0130442
LOC103973608	1.92813	4.98703	0.000624797	0.0130442
LOC103996102	2.36579	5.17705	0.000624964	0.0130442
LOC103970734	1.192	5.99197	0.000624967	0.0130442
LOC103970308	2.15291	3.83204	0.00062545	0.0130447
LOC103998824	-2.48858	8.46748	0.000627599	0.0130799
LOC103971161	1.81811	4.71762	0.000628259	0.0130801
LOC103976754	1.46277	4.53198	0.000628533	0.0130801
LOC103977653	2.81407	7.90167	0.000629749	0.013089
LOC103986933	1.7789	4.44938	0.000630767	0.013089
LOC103997995	-1.26428	3.63213	0.000631052	0.013089
LOC103974613	2.55273	4.12236	0.00063111	0.013089
LOC103990738	1.12907	4.11578	0.000631774	0.013089
LOC103976360	1.25862	5.88644	0.000631788	0.013089
LOC103976718	1.39394	5.28763	0.00063219	0.013089
LOC103986795	1.23781	5.76301	0.000634493	0.0131219
LOC103993789	-2.13936	3.76532	0.000634706	0.0131219
LOC103996735	3.19303	3.30188	0.000636762	0.0131471
LOC103976682	-4.54388	5.04118	0.000636852	0.0131471
LOC103997459	-3.10832	2.68777	0.000638403	0.0131695
LOC103992946	-1.32733	6.20289	0.000640732	0.0132079
LOC103997376	-3.35228	4.191	0.000644055	0.0132668
LOC103992712	1.82584	2.81167	0.000645782	0.0132843
LOC103988071	1.62861	6.27671	0.000645844	0.0132843
LOC103987817	1.21629	6.45028	0.000646627	0.0132893
LOC103993836	-1.75407	3.82653	0.000647022	0.0132893
LOC103976453	1.39524	5.34733	0.000647704	0.0132903
LOC103972669	2.09396	6.25966	0.00064801	0.0132903
LOC103995086	-4.40992	3.12542	0.00064873	0.0132955
LOC103984245	1.05575	4.46169	0.000649225	0.013296
LOC104000844	-1.60532	5.32783	0.000651327	0.0133202
LOC103999728	1.19907	4.68091	0.000651345	0.0133202
LOC103973823	1.2751	3.76751	0.000653173	0.0133403
LOC103986698	1.97998	3.54718	0.000653315	0.0133403
LOC103982081	3.72511	5.056	0.000653742	0.0133403
LOC103997536	1.19546	4.61935	0.000654616	0.0133485
LOC103987774	-1.15779	6.17341	0.000660328	0.0134553
LOC103985567	1.84781	2.05152	0.000662413	0.0134881
LOC103992597	-6.72806	0.0437419	0.000663474	0.0135
LOC103970379	-1.16367	4.6962	0.000665223	0.0135259
LOC103981388	1.9165	4.892	0.000665907	0.0135301
LOC103979213	1.40478	3.06492	0.0006678	0.0135588
LOC103981915	1.3132	3.98226	0.000670791	0.0136098
LOC103983491	2.09737	4.0325	0.000671884	0.0136222
LOC104000664	-1.40145	3.50268	0.000673032	0.0136357
LOC103982420	-2.47356	1.70677	0.000673644	0.0136384
LOC103968489	1.54021	3.85091	0.0006764	0.0136805
LOC103985011	-2.68495	2.60494	0.000676687	0.0136805
LOC103977921	-3.37548	5.9835	0.000677779	0.0136928
LOC104000072	1.55705	3.33279	0.000679296	0.0137116
LOC103997360	-1.38724	3.99118	0.000680211	0.0137116
LOC103998623	2.07194	4.08343	0.000680349	0.0137116
LOC103977715	2.29144	4.12741	0.000680647	0.0137116
LOC103994768	2.52908	3.7741	0.000682414	0.0137375
LOC103975954	-2.49273	10.2154	0.000683712	0.0137538
LOC103992334	1.85354	6.22491	0.000686821	0.0138066
LOC103993060	-2.13785	1.94662	0.000689574	0.0138521
LOC103971710	1.55602	3.42583	0.000691346	0.0138778
LOC103976040	-1.89839	7.29147	0.000694358	0.0139284
LOC103988549	-1.62719	3.74815	0.000695718	0.0139458
LOC103977612	2.4886	5.03742	0.000696861	0.01395
LOC103978704	1.74331	8.72183	0.000696911	0.01395
LOC103973389	1.14339	4.0458	0.000699039	0.0139613
LOC103992551	1.70752	3.35146	0.00069912	0.0139613
LOC103998272	2.55037	5.81922	0.000699394	0.0139613
LOC103993726	1.52237	5.33822	0.000699445	0.0139613
LOC103971152	-4.0105	2.63165	0.000700246	0.0139649
LOC103996984	1.45152	5.185	0.000700608	0.0139649
LOC103988996	-3.40582	3.34312	0.000701904	0.0139742
LOC103993961	2.24937	4.2931	0.000702065	0.0139742
LOC103983035	-3.16107	2.08412	0.000702691	0.0139769
LOC103987449	-1.52689	7.71194	0.000703761	0.0139884
LOC103982652	1.30678	3.85576	0.000704628	0.0139895
LOC103988810	1.47538	4.06742	0.000705233	0.0139895
LOC103974596	4.28883	0.295287	0.000705299	0.0139895
LOC103985756	1.65465	7.80466	0.00070797	0.0140327
LOC103984940	-3.99364	2.69741	0.000709282	0.0140488
LOC103987048	2.74953	3.7332	0.000710524	0.0140636
LOC103988889	-1.33206	4.24888	0.000712525	0.0140934
LOC103977204	-1.61933	4.34024	0.0007158	0.0141483
LOC103988086	1.81011	4.15813	0.00071644	0.0141511
LOC103989623	-1.67792	9.03585	0.00071977	0.0142069
LOC103976145	2.46784	3.20875	0.000721417	0.0142295
LOC103978498	2.48061	4.41558	0.000725554	0.0143002
LOC103983117	-1.86291	5.17614	0.000726009	0.0143002
LOC103996191	-1.51406	4.33043	0.000730035	0.014364
LOC103995757	1.38912	5.06367	0.000730263	0.014364
LOC103997682	2.4041	7.70236	0.000733899	0.0144255
LOC103978867	2.50026	2.72056	0.000734867	0.0144346
LOC103983809	1.88762	7.85209	0.00073573	0.0144415
LOC103987246	-1.47046	6.4163	0.000737515	0.0144665
LOC103995423	2.53794	6.40555	0.000738144	0.0144688
LOC103987480	-3.38482	1.88081	0.000740189	0.0144945
LOC103999065	3.6298	1.16479	0.000740475	0.0144945
LOC103971991	3.10833	2.64318	0.000741596	0.0145064
LOC103985744	1.68609	3.19478	0.000743037	0.0145246
LOC103971964	-1.68861	2.80056	0.000744032	0.014534
LOC103977172	-4.21926	8.44145	0.0007451	0.0145448
LOC103979305	1.29709	8.67623	0.000747417	0.01458
LOC103983100	-1.65855	4.87382	0.000749234	0.0146054
LOC103992354	-2.66726	0.986589	0.000750001	0.0146103
LOC103991320	1.69783	4.2383	0.000751159	0.0146228
LOC103980720	2.01553	4.85613	0.000752039	0.0146289
LOC103978427	-2.43732	2.7317	0.000752505	0.0146289
LOC103975064	-1.51312	4.7833	0.000755396	0.0146751
LOC103972320	1.19092	5.81217	0.000756286	0.0146823
LOC103980928	1.02992	4.82293	0.000757475	0.0146899
LOC103977115	2.13287	4.49691	0.000757712	0.0146899
LOC103987201	1.75453	3.4951	0.000758324	0.0146917
LOC103988921	1.90297	2.55565	0.000760001	0.0147011
LOC104000931	0.966856	5.85868	0.000760235	0.0147011
LOC103991279	-2.72837	0.547332	0.000760368	0.0147011
LOC103998362	1.80022	4.74569	0.000766155	0.0148029
LOC103995559	1.74246	3.10362	0.000767824	0.0148251
LOC103994330	3.85744	2.3499	0.00076922	0.0148419
LOC103981337	-1.21209	4.05975	0.000769954	0.014846
LOC103997584	3.90829	2.88374	0.000772218	0.0148795
LOC103982004	-1.68658	3.23508	0.000773404	0.0148922
LOC103970360	1.28356	6.72842	0.000775122	0.0149152
LOC103968620	-2.4165	4.48546	0.000777156	0.0149442
LOC103986837	2.57338	2.05115	0.000778139	0.0149529
LOC103968502	1.15868	4.17637	0.000783806	0.0150516
LOC103986591	-1.03157	5.16723	0.000787993	0.0151218
LOC103978917	-4.36836	5.03054	0.000788701	0.0151251
LOC103968977	1.52011	7.65751	0.000790135	0.0151327
LOC103997410	1.26188	3.47839	0.000791359	0.0151327
LOC103992137	-1.47875	3.31626	0.000791528	0.0151327
LOC103985301	-1.37449	7.3755	0.000791698	0.0151327
LOC103971535	2.25208	6.80477	0.000791764	0.0151327
LOC103985571	1.09284	5.15668	0.000794261	0.0151702
LOC103976471	-1.59753	4.72521	0.000796498	0.0152026
LOC103975515	1.1501	4.70218	0.000797488	0.0152113
LOC103974388	2.43069	2.94292	0.000800816	0.0152645
LOC103994470	2.22675	2.64611	0.00080255	0.0152873
LOC103982635	1.48851	4.53946	0.000803675	0.0152984
LOC103996808	2.72191	8.0343	0.000810795	0.0154236
LOC103972274	1.68162	3.39142	0.000814966	0.0154926
LOC103988813	-1.60557	3.24404	0.000817941	0.0155387
LOC103973280	1.31109	4.48899	0.000820207	0.0155643
LOC103985740	-1.62732	4.17883	0.000820876	0.0155643
LOC103977296	1.62597	2.73333	0.000820939	0.0155643
LOC103968769	1.60762	3.86527	0.000823457	0.0156017
LOC103992682	-1.45054	3.72148	0.00082412	0.0156038
LOC103992414	-4.12658	1.21006	0.00082526	0.0156149
LOC103985051	3.61388	2.22747	0.000827732	0.0156512
LOC103969432	-1.72372	2.61843	0.00082861	0.0156574
LOC103999784	-1.30341	5.6069	0.000829631	0.0156663
LOC103984130	-1.03785	6.34483	0.000833509	0.015729
LOC103996494	1.67906	2.90358	0.000835604	0.0157581
LOC103999101	-1.75438	7.08274	0.000838937	0.0158054
LOC103989601	2.87621	4.66435	0.000839228	0.0158054
LOC103987076	2.65621	2.25517	0.000840215	0.0158134
LOC103974279	1.62514	3.71434	0.000841578	0.0158212
LOC104000952	-3.05007	1.22111	0.000841741	0.0158212
LOC103969885	-1.56901	2.86802	0.000842548	0.0158258
LOC103976079	1.91005	3.11171	0.000845698	0.0158745
LOC103993440	2.47828	2.35482	0.000846521	0.0158783
LOC103982771	1.33675	4.94708	0.000847024	0.0158783
LOC103999372	2.33343	4.58936	0.000847739	0.0158812
LOC103982626	-2.29849	8.65765	0.000848594	0.0158813
LOC103981254	1.08828	5.33974	0.000848864	0.0158813
LOC103975918	2.15548	1.353	0.000849996	0.015892
LOC103978329	1.68711	2.32485	0.000853625	0.0159493
LOC103979661	2.56568	2.02481	0.000857258	0.0160067
LOC103975628	4.89547	7.58825	0.000860421	0.0160552
LOC103973538	1.62725	7.64851	0.000861476	0.0160643
LOC103968789	2.44148	5.21356	0.000865735	0.0161331
LOC103995087	-2.92745	5.92365	0.000867354	0.0161438
LOC103975164	2.52089	2.87898	0.000867448	0.0161438
LOC104000350	-2.72476	1.04072	0.000868466	0.0161521
LOC103987806	-1.61649	2.67189	0.00087043	0.016178
LOC103992248	-3.13971	1.68446	0.000873534	0.0162251
LOC103979714	1.72269	7.96169	0.000876376	0.0162672
LOC103996034	1.47757	5.34976	0.000877651	0.0162772
LOC103970298	1.58301	3.43159	0.000878064	0.0162772
LOC103978944	2.48131	0.830571	0.000881291	0.0163263
LOC103999406	2.70144	0.498386	0.000884005	0.0163568
LOC103993232	-1.64501	3.35952	0.000884087	0.0163568
LOC103983620	-1.16474	4.47122	0.000886288	0.0163868
LOC103982197	-1.75902	7.20564	0.000887298	0.0163948
LOC103978744	-2.04848	4.64815	0.000890848	0.0164496
LOC103997736	-1.54925	6.52295	0.000891677	0.0164542
LOC103972226	-2.75048	2.16017	0.000893176	0.0164712
LOC103987010	-1.25114	3.94176	0.000897541	0.0165409
LOC103980202	1.34462	4.5515	0.000900761	0.0165895
LOC103991714	1.41202	11.1939	0.000904764	0.0166524
LOC103975237	1.51105	5.61116	0.00090732	0.0166886
LOC103978527	1.50046	5.41003	0.000909473	0.0167173
LOC103969063	-1.45028	3.78635	0.000910389	0.0167233
LOC103987855	1.36926	4.9297	0.000919053	0.0168715
LOC103988173	1.485	9.81789	0.000919784	0.016874
LOC103974216	-3.97101	3.83722	0.000922309	0.0169072
LOC103996023	3.27337	2.67296	0.000922884	0.0169072
LOC103987345	1.26021	4.19774	0.00092338	0.0169072
LOC103993867	1.96359	3.64927	0.000928414	0.0169884
LOC103968673	7.74663	-0.0463667	0.000930171	0.0170095
LOC103983009	-1.67945	4.89746	0.000931111	0.0170157
LOC103998562	1.09769	4.90728	0.000932328	0.017027
LOC103972010	-2.64353	4.5361	0.000933607	0.017034
LOC103977979	1.21942	5.24513	0.00093438	0.017034
LOC103971760	5.59051	-0.438449	0.000934517	0.017034
LOC103995020	-2.32145	2.79035	0.000936999	0.0170683
LOC103984159	1.12459	4.871	0.000942219	0.0171524
LOC104000703	-3.06	2.31197	0.00094384	0.0171651
LOC103968568	2.35236	2.55607	0.00094413	0.0171651
LOC103992434	-1.61542	4.03957	0.000945485	0.0171787
LOC103982584	-1.46745	4.73502	0.000954389	0.0173294
LOC103971613	2.60203	3.29878	0.000955236	0.0173337
LOC103985235	-1.70484	2.52704	0.000957062	0.017338
LOC103996040	2.06824	4.68914	0.000957381	0.017338
LOC103984717	-1.71673	5.11205	0.000957683	0.017338
LOC103973776	1.06124	4.49462	0.00095792	0.017338
LOC103989687	2.24378	6.77761	0.000965638	0.0174665
LOC103974861	-2.30979	1.53738	0.00097451	0.0176158
LOC103989841	3.45654	1.89528	0.000975708	0.0176262
LOC103980802	2.1317	6.93214	0.000976782	0.0176343
LOC103994064	1.55132	5.53337	0.000978624	0.0176528
LOC103973948	-1.07147	4.81577	0.000979049	0.0176528
LOC103978860	-1.61437	4.10181	0.000986041	0.0177675
LOC103968509	-1.35447	3.28518	0.000989468	0.017818
LOC103986017	-1.0547	4.48218	0.000990948	0.0178333
LOC103983547	1.30862	4.33693	0.000992246	0.0178453
LOC104000722	1.33208	4.6035	0.000993905	0.0178638
LOC103982746	2.55969	8.3851	0.000997165	0.0179111
LOC103968877	1.23443	4.30371	0.000998062	0.0179158
LOC104000316	1.74784	3.21364	0.000999123	0.0179235
LOC103978245	2.14791	2.40049	0.00100282	0.0179685
LOC103993237	-2.19673	5.06336	0.0010029	0.0179685
LOC103975400	-1.61117	3.10151	0.00100548	0.0180034
LOC103992347	-1.21716	4.2095	0.00101137	0.0180974
LOC104000234	1.78267	3.34375	0.00101875	0.0182073
LOC103998011	-7.23242	1.05849	0.00101984	0.0182073
LOC103986694	-2.03411	3.07723	0.00102064	0.0182073
LOC103974700	2.24415	1.97405	0.00102139	0.0182073
LOC103979265	2.21462	3.37806	0.00102186	0.0182073
LOC103989391	3.51195	0.70445	0.00102193	0.0182073
LOC103970270	1.6843	5.30186	0.0010222	0.0182073
LOC103998019	1.37942	6.7283	0.00102265	0.0182073
LOC103984714	-1.73818	4.74876	0.0010251	0.0182395
LOC103986053	2.51986	3.69163	0.00102739	0.0182687
LOC103987289	1.40963	6.95785	0.00103202	0.0183288
LOC103972970	1.60545	5.52451	0.00103206	0.0183288
LOC103972029	4.72811	0.446488	0.00103539	0.0183764
LOC103977886	1.14677	7.0686	0.00103646	0.0183839
LOC103982835	-1.16086	5.989	0.00104076	0.0184486
LOC103983427	2.47283	2.96683	0.00104582	0.0185146
LOC103993356	1.53089	5.4439	0.00104618	0.0185146
LOC103975481	-2.39713	6.43286	0.00104645	0.0185146
LOC103994537	-3.59417	0.641947	0.00104991	0.0185643
LOC103982099	-2.01274	2.7515	0.00105058	0.0185645
LOC103998556	1.20263	9.52243	0.0010522	0.0185816
LOC103981312	2.47406	1.8782	0.00105481	0.0186162
LOC103990115	-1.63554	4.79997	0.00105586	0.0186231
LOC103975993	2.05935	6.60138	0.00105746	0.0186397
LOC103998383	1.11951	4.4273	0.00105824	0.0186418
LOC103995797	1.19976	6.23838	0.00105935	0.0186498
LOC103998024	1.78335	3.88364	0.00106214	0.0186873
LOC103982640	-1.92856	2.47503	0.00106444	0.0187161
LOC103981792	1.90813	7.86664	0.00106924	0.018789
LOC103969059	1.23055	4.78959	0.00107194	0.0188184
LOC103999359	1.66594	4.78994	0.00107226	0.0188184
LOC103990829	-2.30848	5.02672	0.00107291	0.0188184
LOC103984294	2.37887	3.93846	0.00107379	0.0188222
LOC103995193	1.11664	4.92127	0.00107591	0.0188409
LOC103970150	1.80124	3.09375	0.00107619	0.0188409
LOC103968790	2.45471	5.41899	0.00107937	0.018885
LOC103969401	-1.7889	4.11663	0.00108622	0.018993
LOC103995907	2.28601	6.21439	0.00108695	0.0189942
LOC103992519	1.85949	7.37289	0.00108905	0.0190192
LOC103992507	-2.18706	2.06359	0.0010912	0.0190449
LOC103972675	2.37557	3.51725	0.00109419	0.0190793
LOC103999895	-2.45875	1.18588	0.00109453	0.0190793
LOC103976955	-1.3898	3.12002	0.00109575	0.0190793
LOC103981977	-1.78558	2.45491	0.00109597	0.0190793
LOC103994200	1.94139	3.83513	0.00109654	0.0190793
LOC103983682	3.05729	0.479098	0.00109791	0.0190841
LOC103981447	-2.15111	1.93416	0.00109816	0.0190841
LOC103972148	-2.80228	1.47691	0.00109911	0.0190889
LOC103970330	1.52556	7.58546	0.0011059	0.0191902
LOC103986124	-2.05862	4.80779	0.00110666	0.0191902
LOC103982616	1.64357	4.67207	0.00110697	0.0191902
LOC103998349	-4.25473	6.2874	0.00110912	0.0192157
LOC103985373	2.12337	7.35782	0.00111194	0.0192527
LOC103990208	1.50932	6.16875	0.00111406	0.0192777
LOC103982980	1.61844	4.2431	0.00111633	0.0193052
LOC103984277	1.27983	3.84357	0.00111893	0.0193384
LOC103977139	2.64456	0.859579	0.00111989	0.0193432
LOC104000216	1.49935	7.6536	0.00112174	0.0193633
LOC103980018	-2.13048	4.0748	0.00112544	0.0194154
LOC103972919	1.49694	5.014	0.00112742	0.0194378
LOC103997696	-1.76876	3.56102	0.00113178	0.019501
LOC103976410	-1.30195	2.83705	0.00113374	0.019523
LOC103986223	-1.43542	4.42424	0.00113568	0.0195387
LOC103991509	-2.42514	2.62	0.00113604	0.0195387
LOC103991548	2.46441	4.48292	0.00113765	0.0195446
LOC103987788	2.14596	3.0521	0.00113776	0.0195446
LOC103999908	2.57129	4.09605	0.0011385	0.0195455
LOC103987204	-1.54503	3.99279	0.00113924	0.0195464
LOC103979666	-1.11616	4.87173	0.0011417	0.0195651
LOC103989254	-6.54221	-0.246963	0.00114266	0.0195651
LOC103977836	-1.87965	3.6745	0.00114298	0.0195651
LOC103994618	1.99511	2.03167	0.0011436	0.0195651
LOC103979737	-2.20905	2.62846	0.00114378	0.0195651
LOC103992341	2.50443	4.59748	0.00114522	0.0195778
LOC103999920	1.33652	3.5002	0.00114831	0.0196189
LOC103994463	-1.28832	6.4403	0.00115006	0.0196318
LOC103999628	-7.08556	-0.92613	0.00115083	0.0196318
LOC103975581	-1.5863	7.14992	0.00115167	0.0196318
LOC103972550	1.36299	3.4552	0.00115184	0.0196318
LOC103996617	1.351	4.44811	0.00115451	0.0196656
LOC103971612	1.53473	4.34004	0.00115694	0.019695
LOC103987969	1.52224	5.11232	0.00116313	0.0197886
LOC103989125	-1.18603	4.37693	0.00116433	0.0197971
LOC103973463	-1.50966	2.65049	0.0011655	0.0197975
LOC103980309	-1.31441	2.57686	0.00116575	0.0197975
LOC103971742	1.31203	3.38269	0.00116776	0.0198197
LOC103969821	0.952541	4.72142	0.00116857	0.0198216
LOC103992220	2.5353	8.42484	0.00116955	0.0198264
LOC103993023	2.12232	2.66936	0.00117209	0.0198575
LOC103979733	1.03728	5.04149	0.00117291	0.0198596
LOC103970022	1.17819	4.50338	0.00117588	0.019895
LOC103969639	1.11082	4.30706	0.00117641	0.019895
LOC103984897	1.05198	4.90372	0.00117749	0.0199015
LOC103972390	1.41561	7.17896	0.0011818	0.0199625
LOC103980772	2.26921	1.91275	0.00118357	0.0199805
LOC103994672	2.88225	6.63665	0.00118797	0.0200367
LOC103987276	1.45751	3.55149	0.00118902	0.0200367
LOC103984538	1.10324	3.7389	0.00118903	0.0200367
LOC103983024	1.90786	4.17715	0.00119325	0.020096
LOC103997554	-4.04986	2.09704	0.00119441	0.0201035
LOC103986583	1.54955	5.57564	0.00119637	0.0201128
LOC103994501	-1.18787	4.62187	0.00119638	0.0201128
LOC103989583	2.70152	6.43422	0.00119991	0.0201602
LOC103969193	-1.55863	5.42881	0.00120079	0.0201631
LOC103984109	-2.17618	3.92018	0.00120818	0.0202752
LOC104000237	1.89946	5.3516	0.00120925	0.020281
LOC103983852	1.62489	6.31234	0.00121179	0.0203116
LOC103996253	1.40009	7.63325	0.00121367	0.0203312
LOC103984508	1.89223	6.72588	0.00121516	0.0203416
LOC103994081	-2.07577	2.69901	0.00121573	0.0203416
LOC103972022	3.11215	2.19695	0.00121887	0.0203821
LOC103968767	1.28933	5.57555	0.00122095	0.0204049
LOC103977210	1.32364	3.96535	0.00122298	0.0204241
LOC103997443	-1.00642	4.73612	0.00122354	0.0204241
LOC103985212	1.85747	4.4941	0.00122598	0.0204505
LOC103982075	2.13758	3.43878	0.00122678	0.0204505
LOC103983482	1.10853	4.65201	0.00122729	0.0204505
LOC103999021	-1.61413	4.49809	0.00122909	0.0204684
LOC103986383	2.16189	5.93906	0.00123021	0.0204752
LOC103978671	-2.52087	2.64562	0.0012314	0.0204829
LOC104000338	-1.79406	3.25503	0.00123438	0.0205204
LOC103981121	-4.37764	1.19877	0.00123777	0.0205565
LOC103999738	-1.09224	3.5464	0.00123815	0.0205565
LOC103972307	-1.7148	10.9706	0.00123873	0.0205565
LOC103973360	-2.38764	5.39449	0.00124528	0.0206367
LOC103984257	2.08086	4.38656	0.00124547	0.0206367
LOC103994834	-1.96118	2.87096	0.00124575	0.0206367
LOC103984222	1.46904	3.15269	0.00124963	0.0206889
LOC103986609	1.66552	3.90285	0.00125359	0.0207424
LOC103983039	2.41048	6.26839	0.00125795	0.0207968
LOC103998625	1.34359	7.25444	0.00125835	0.0207968
LOC103976175	2.30827	4.24513	0.00127149	0.0210019
LOC103991991	1.68738	4.4428	0.00127606	0.0210651
LOC103968601	1.77432	5.07257	0.00127805	0.0210856
LOC103993219	2.6506	3.12183	0.00127908	0.0210904
LOC103968716	-2.51843	1.97423	0.00128003	0.0210937
LOC103974320	2.34257	4.89039	0.00128206	0.0211149
LOC103988558	-1.80299	6.54796	0.00128536	0.021157
LOC103971221	-3.88306	1.4281	0.00129002	0.0212184
LOC103994020	0.948936	7.56407	0.00129059	0.0212184
LOC103991708	1.57578	3.20637	0.00129428	0.0212667
LOC103969807	3.93922	2.53468	0.00129682	0.021296
LOC103981149	2.11458	2.18739	0.0013002	0.0213393
LOC103993065	2.62768	6.44294	0.00130667	0.0214331
LOC103980929	-1.7151	4.66345	0.00130857	0.0214518
LOC103974958	-3.02485	1.88911	0.00130941	0.0214532
LOC103981973	1.85023	8.98893	0.00131194	0.0214821
LOC103993866	1.55277	6.47088	0.00131279	0.0214837
LOC103993879	2.09895	4.94837	0.00131474	0.0215031
LOC103970782	1.57464	4.58869	0.0013168	0.0215244
LOC103972446	1.51822	4.76249	0.00132111	0.0215824
LOC103983237	2.18515	3.93237	0.00132299	0.0216007
LOC103989418	2.78584	4.95653	0.00132846	0.0216775
LOC103985548	-3.4402	3.876	0.00133656	0.0217872
LOC103984053	1.93037	6.4553	0.00133672	0.0217872
LOC103983321	2.38885	1.52982	0.00134083	0.0218318
LOC103995617	1.23038	4.31575	0.00134116	0.0218318
LOC103982831	-2.27299	8.52531	0.00134179	0.0218318
LOC103999589	-2.08957	2.5771	0.00134276	0.0218318
LOC103979221	1.81713	2.37432	0.00134331	0.0218318
LOC103984958	1.74168	6.64296	0.0013462	0.0218664
LOC103987058	2.00088	6.43997	0.00135407	0.0219815
LOC103971563	1.99047	5.02797	0.00135836	0.0220385
LOC103971547	1.8996	3.90195	0.00136594	0.0221488
LOC103974798	-2.06528	4.50656	0.001372	0.0222345
LOC103970094	1.84415	4.00608	0.00137775	0.0223035
LOC103982803	-2.75949	2.04932	0.00137784	0.0223035
LOC103970161	1.19293	4.3348	0.00138016	0.0223283
LOC103998400	1.49974	3.50214	0.00138445	0.0223849
LOC103993635	1.58799	5.20381	0.00138551	0.0223893
LOC103997145	-1.07185	5.8956	0.00138727	0.0223965
LOC103995321	3.1332	2.09421	0.00138753	0.0223965
LOC103999183	2.11947	4.96947	0.00138866	0.0224019
LOC103969275	-3.4066	7.3729	0.00139338	0.022453
LOC103999246	-3.0755	2.84589	0.00139341	0.022453
LOC103979983	1.13711	4.68887	0.00139859	0.0225236
LOC103988136	1.24853	7.87349	0.0014011	0.0225512
LOC103970292	1.08858	5.28791	0.00140353	0.0225776
LOC103968398	-4.66745	-0.00133978	0.00140841	0.0226433
LOC103980564	4.07103	0.380152	0.00141024	0.0226597
LOC103994072	1.5955	4.36334	0.00141109	0.0226605
LOC103997606	-1.92346	4.9387	0.00141264	0.0226726
LOC103984836	1.04058	5.91577	0.00141355	0.0226744
LOC103976103	-1.04836	4.5269	0.00141521	0.0226845
LOC103993380	3.17331	1.48668	0.00141591	0.0226845
LOC103993363	1.74228	5.61639	0.00141702	0.0226845
LOC103973514	-1.55994	4.15526	0.00141738	0.0226845
LOC103994798	-1.18747	3.48178	0.00142329	0.0227663
LOC103976295	-1.42711	4.49701	0.00143004	0.0228613
LOC103998404	2.46417	7.06841	0.00143281	0.0228861
LOC103968587	-1.17041	4.47449	0.00143321	0.0228861
LOC103968743	-1.69501	2.49408	0.00144771	0.0230964
LOC103993000	-5.22841	-0.539509	0.00144801	0.0230964
LOC103995749	-1.68506	1.95833	0.00145342	0.0231696
LOC103979407	1.84733	6.73123	0.00145481	0.0231789
LOC103975596	1.67101	7.43772	0.00145671	0.0231865
LOC103979876	1.23112	4.57201	0.00145693	0.0231865
LOC103999659	1.42388	7.87787	0.00145985	0.0232199
LOC103992333	1.02324	4.50748	0.00146429	0.0232658
LOC103990768	1.97364	5.6237	0.00146437	0.0232658
LOC103994487	-1.99565	3.24346	0.00147187	0.0233718
LOC103985598	-1.15972	6.24466	0.00147355	0.0233853
LOC103997092	1.49497	5.69371	0.00148012	0.0234765
LOC103993750	1.4294	3.29577	0.00148501	0.0235258
LOC103975733	-3.52394	2.00386	0.00148551	0.0235258
LOC103990360	2.5806	3.20569	0.00148572	0.0235258
LOC103995680	2.81135	3.10009	0.00148705	0.0235338
LOC103983092	1.30814	4.6732	0.00148943	0.0235583
LOC103997029	1.70763	5.74786	0.00149158	0.0235791
LOC103992854	-2.70271	2.27301	0.00149569	0.0236217
LOC103986264	1.86872	5.3685	0.00149594	0.0236217
LOC103972252	1.11	5.23248	0.0014972	0.0236284
LOC103982790	-2.14782	5.70079	0.00150105	0.023676
LOC103989032	1.82725	5.21665	0.00150239	0.0236839
LOC103977305	2.47648	6.43543	0.00150465	0.0236991
LOC103982592	1.50295	4.43308	0.00150502	0.0236991
LOC103970570	-2.30805	1.7174	0.0015068	0.0237139
LOC103987432	-1.98949	3.08422	0.0015201	0.0239099
LOC103999743	-2.17413	2.15046	0.00152119	0.0239138
LOC103969407	1.27721	5.40964	0.00152385	0.0239319
LOC103974400	-3.4746	0.0962274	0.00152403	0.0239319
LOC103981818	-1.29261	5.13473	0.00152709	0.0239668
LOC103978072	-2.63412	0.280154	0.00153118	0.0240057
LOC103992014	-1.06234	4.50452	0.00153127	0.0240057
LOC103994571	-1.0582	4.7833	0.00153333	0.0240068
LOC103986141	1.30631	3.78919	0.00153364	0.0240068
LOC103980236	2.35027	2.62854	0.0015342	0.0240068
LOC103987069	1.41919	2.9442	0.00153473	0.0240068
LOC103977911	-3.03815	2.22451	0.00153765	0.0240392
LOC103981000	1.58192	4.48466	0.00153948	0.0240545
LOC103971844	1.19164	4.37403	0.00154076	0.0240613
LOC103991415	-1.39092	4.13789	0.00154171	0.0240629
LOC103995034	3.34609	5.9466	0.00154627	0.0241208
LOC103972456	1.26481	5.20751	0.00154918	0.0241529
LOC103974295	-3.22055	7.64254	0.00155303	0.0241996
LOC103986978	-1.74457	3.22571	0.00156094	0.0243094
LOC103969717	1.13959	3.94733	0.00156979	0.0244294
LOC103989130	-1.27038	4.51048	0.00157036	0.0244294
LOC103993650	1.99121	9.00305	0.00157898	0.0245384
LOC103985168	2.09533	1.90718	0.00157938	0.0245384
LOC103982386	-1.64423	3.67902	0.00157997	0.0245384
LOC103987386	-2.75734	4.16423	0.00158245	0.0245536
LOC104000957	-2.18364	3.34581	0.00158268	0.0245536
LOC104000673	2.8622	2.38303	0.00158913	0.0246318
LOC103988512	-2.19266	5.91134	0.00158946	0.0246318
LOC103982267	1.41651	3.10286	0.00159311	0.0246749
LOC103978223	1.50389	5.20846	0.00160162	0.0247585
LOC103985333	-1.8441	3.00806	0.00160189	0.0247585
LOC103983680	1.11385	4.00085	0.00160198	0.0247585
LOC103974107	-1.56454	5.16792	0.001602	0.0247585
LOC103969258	1.78267	3.76195	0.00162	0.0250231
LOC103998237	1.54864	3.22349	0.00162343	0.0250623
LOC103980677	4.8778	0.631911	0.00162498	0.0250669
LOC103984410	2.42655	7.60108	0.00162581	0.0250669
LOC103974753	2.77329	3.61343	0.00162637	0.0250669
LOC103979889	1.49814	4.40624	0.00162795	0.0250776
LOC103998084	1.84283	9.1249	0.00163363	0.0251513
LOC103996187	-2.66461	7.7657	0.00163517	0.025152
LOC103978824	-1.79466	4.44538	0.0016358	0.025152
LOC103976749	-1.38182	4.69815	0.00163634	0.025152
LOC103978407	1.43524	8.49686	0.00163819	0.0251598
LOC103997104	-2.95615	2.88849	0.00163862	0.0251598
LOC103984903	-1.94139	1.624	0.00164523	0.0252476
LOC103969254	1.04063	5.01053	0.0016558	0.0253961
LOC104000487	1.19132	3.42067	0.00165848	0.0254175
LOC103990931	2.66333	3.4957	0.00165899	0.0254175
LOC103992735	-2.7216	5.4738	0.00166181	0.025447
LOC103999178	-1.40402	4.52146	0.00166916	0.0255458
LOC103976046	1.72937	4.9324	0.0016777	0.0256626
LOC103998403	-1.39277	5.26382	0.00167868	0.0256637
LOC103978257	-1.81583	4.97124	0.00168031	0.0256686
LOC104000268	-1.34567	3.70114	0.00168081	0.0256686
LOC103975840	-1.72566	2.99322	0.00168275	0.0256774
LOC103982123	1.42748	4.45524	0.0016832	0.0256774
LOC103989425	1.11344	5.46069	0.00168736	0.025727
LOC103986724	-1.28149	5.1359	0.00169423	0.0258039
LOC103993740	1.41305	3.81316	0.00169456	0.0258039
LOC103981482	1.08118	4.86398	0.00169514	0.0258039
LOC103984861	-1.6796	2.18651	0.001701	0.0258707
LOC103996654	1.76506	4.41129	0.00170135	0.0258707
LOC103976177	1.87102	3.17499	0.00170683	0.0259402
LOC103988054	2.7749	3.96496	0.00170784	0.0259416
LOC103979315	-1.32597	3.98334	0.00170901	0.0259455
LOC103977658	2.33634	1.95257	0.00171159	0.0259707
LOC103972317	2.03452	6.36226	0.00171583	0.0260117
LOC103970954	-5.83482	-0.613746	0.00171612	0.0260117
LOC103979424	1.54127	7.77026	0.00172071	0.0260672
LOC103986539	-2.05986	1.86851	0.00172484	0.0261159
LOC103989093	-1.51743	7.05002	0.00172602	0.0261198
LOC103981359	1.95013	4.97164	0.00172749	0.026128
LOC103988759	-2.69707	5.6925	0.00173259	0.0261776
LOC103992363	1.7045	2.27446	0.00173363	0.0261776
LOC103997435	1.51364	4.98805	0.00173387	0.0261776
LOC103981933	2.02936	5.56251	0.00173494	0.0261776
LOC103986332	1.61406	7.30439	0.00173538	0.0261776
LOC103978561	-2.10404	4.92415	0.00173875	0.0262028
LOC103982207	-3.0683	3.02294	0.00173891	0.0262028
LOC103982048	2.34314	3.43294	0.00174783	0.0263234
LOC103994658	-1.09788	2.94293	0.00175327	0.0263913
LOC103983598	-1.80553	5.85479	0.0017551	0.0263984
LOC103971738	-1.68632	4.6453	0.00175561	0.0263984
LOC103974605	-2.20106	2.31632	0.00175873	0.0264313
LOC103986442	-1.48117	2.73135	0.00175991	0.026435
LOC103995893	-4.17333	1.27427	0.00176174	0.0264485
LOC103986901	1.93138	4.73363	0.00176611	0.0265001
LOC103978630	-1.29038	4.05024	0.00176964	0.026539
LOC103999556	-2.8822	1.02801	0.00177328	0.0265725
LOC103998606	2.37104	2.67532	0.00177504	0.0265725
LOC103973931	-1.02302	4.83651	0.00177577	0.0265725
LOC103984873	-1.26014	4.74896	0.00177597	0.0265725
LOC103981083	3.70504	1.68562	0.00177746	0.0265725
LOC103983155	1.22638	4.7298	0.0017775	0.0265725
LOC103997567	3.99018	0.96831	0.00178118	0.0266135
LOC103993075	-2.98225	1.34737	0.00178314	0.026628
LOC103983760	4.18157	0.853133	0.00178403	0.026628
LOC103988073	1.89424	3.42698	0.00179029	0.0267074
LOC103981144	-2.78173	2.9165	0.00179273	0.0267191
LOC103976530	1.36372	3.36858	0.00179296	0.0267191
LOC103987333	-1.11699	5.5618	0.00179624	0.0267441
LOC103969448	2.07577	4.21992	0.00179652	0.0267441
LOC103975356	2.40978	3.38749	0.00181193	0.026957
LOC103996269	-1.69972	2.48784	0.00181273	0.026957
LOC103970580	-2.04046	4.47197	0.00181571	0.0269783
LOC103980234	1.8283	1.75567	0.00181607	0.0269783
LOC103984229	1.99555	8.78399	0.00181895	0.027007
LOC103980475	2.76063	3.28098	0.00182345	0.0270596
LOC103995129	2.9095	3.62289	0.0018315	0.0271649
LOC103981966	1.76234	2.69395	0.00183764	0.0272417
LOC103981506	1.2791	3.53424	0.00183986	0.0272604
LOC103989835	2.03847	2.22021	0.0018465	0.0273311
LOC103992490	2.25146	7.57331	0.00184657	0.0273311
LOC103969475	2.72717	6.35651	0.0018491	0.0273517
LOC103975449	-3.33885	1.44836	0.00184989	0.0273517
LOC103995060	2.08374	2.03114	0.00185203	0.0273691
LOC103990411	-5.02521	1.22244	0.00185318	0.0273718
LOC103973501	-5.0177	3.67476	0.00185457	0.0273761
LOC103973925	-1.13493	5.21071	0.00185625	0.0273761
LOC103996378	1.29065	6.25207	0.00185718	0.0273761
LOC103978260	1.52603	4.38707	0.00185733	0.0273761
LOC103970601	1.06799	5.3901	0.00186011	0.0274028
LOC103998168	-2.84479	2.37365	0.00186207	0.0274175
LOC103996904	2.06971	6.21735	0.00186443	0.027438
LOC103980219	1.59178	4.07573	0.00186868	0.0274743
LOC103980816	2.12906	2.86705	0.00186914	0.0274743
LOC103989422	-1.33069	6.48381	0.00186981	0.0274743
LOC103980647	1.95132	7.45209	0.00187105	0.0274782
LOC103981910	1.88334	6.92095	0.00187303	0.0274908
LOC103989496	-1.71911	3.37545	0.00187385	0.0274908
LOC103982009	-1.46307	4.27173	0.00187658	0.027512
LOC103979141	-1.95728	3.57843	0.00187723	0.027512
LOC103982254	1.49198	4.05822	0.00187961	0.0275327
LOC103994100	3.42177	1.86916	0.00188659	0.0276205
LOC103976645	-1.23952	3.79511	0.0018911	0.0276724
LOC103998933	2.11939	3.04406	0.00189375	0.0276856
LOC103984657	1.14197	3.41281	0.00189396	0.0276856
LOC104000142	-1.21596	4.66485	0.00190359	0.027812
LOC103987839	1.42534	4.28032	0.00190619	0.0278357
LOC103976562	3.84484	-0.415993	0.00190797	0.0278473
LOC103975678	1.74625	6.07903	0.00191026	0.0278665
LOC103971530	1.39816	3.03114	0.00191225	0.027881
LOC103974905	-2.92008	3.38753	0.00191729	0.0279402
LOC103978702	1.80356	8.72703	0.00192194	0.0279935
LOC104000469	1.41781	4.36492	0.00192591	0.0280246
LOC103983942	-1.3068	6.35329	0.00192605	0.0280246
LOC103975639	2.1505	3.96738	0.00193246	0.0281034
LOC103986567	-1.61588	3.22905	0.00193389	0.0281098
LOC103982465	1.33389	3.97215	0.00193703	0.0281411
LOC103976564	1.06296	4.90653	0.00193838	0.0281424
LOC103976782	1.80245	4.47779	0.00193911	0.0281424
LOC103973869	-1.2092	5.94969	0.00194093	0.0281544
LOC103996620	-1.20948	3.74613	0.00194338	0.0281581
LOC103992184	2.61578	5.51255	0.00194392	0.0281581
LOC103971907	1.25628	4.58562	0.00194417	0.0281581
LOC103995212	-1.75524	2.25319	0.00194658	0.028166
LOC103997375	1.85336	4.32589	0.0019467	0.028166
LOC103994024	1.44554	7.21515	0.00195416	0.0282596
LOC103995095	2.64947	3.41712	0.00196377	0.028384
LOC103993333	-2.12545	4.83311	0.00197293	0.0284948
LOC103978293	-4.28726	1.59309	0.00197345	0.0284948
LOC103972838	-1.13337	4.96844	0.0019788	0.0285577
LOC103985305	0.866045	5.03452	0.00198585	0.0286447
LOC103975059	4.45815	1.01877	0.00199187	0.028717
LOC103989649	2.1533	3.5733	0.00199555	0.0287554
LOC103988401	4.82683	-0.295557	0.00200622	0.0288945
LOC103982362	-1.94616	2.8407	0.00200741	0.028897
LOC103972445	1.74223	5.20709	0.00202154	0.0290498
LOC103993945	-2.73846	3.30645	0.00202265	0.0290498
LOC103990694	1.06551	4.50848	0.00202277	0.0290498
LOC103996684	2.76906	1.15339	0.00202378	0.0290498
LOC103982742	-3.3207	2.83769	0.00202389	0.0290498
LOC103994439	2.54084	7.32932	0.00202434	0.0290498
LOC103982880	1.58929	4.28162	0.0020252	0.0290498
LOC103995945	-1.43245	6.34575	0.00203421	0.0291643
LOC103999975	-1.11472	3.20163	0.00203756	0.0291975
LOC103968633	1.52248	3.03246	0.00204558	0.0292911
LOC103995561	-5.61146	-0.463811	0.00204616	0.0292911
LOC103985800	1.66314	5.89927	0.00205096	0.0293399
LOC103994684	-2.15602	2.91991	0.00205164	0.0293399
LOC103994962	1.57029	7.47022	0.00205337	0.0293499
LOC103977308	-1.03221	6.08674	0.00205591	0.0293713
LOC104000404	-2.34477	0.861675	0.00205969	0.0294075
LOC103992300	-2.31712	3.19033	0.00206168	0.0294075
LOC103970391	-4.36634	0.719876	0.00206195	0.0294075
LOC103998621	0.973081	5.93614	0.00206259	0.0294075
LOC103990850	2.42114	5.82809	0.00206868	0.0294726
LOC103995550	0.974615	6.74741	0.00206988	0.0294726
LOC103997091	1.26658	5.31549	0.00207076	0.0294726
LOC103982928	-1.03791	4.37166	0.00207132	0.0294726
LOC103979090	1.18779	4.32305	0.00207577	0.0295212
LOC103975937	-1.70067	2.78415	0.00207961	0.029561
LOC103976800	1.88398	3.58627	0.00208158	0.0295741
LOC103989202	1.85303	6.11229	0.00208508	0.0296089
LOC103986561	1.87024	2.37281	0.0020872	0.0296242
LOC103988233	-6.7422	0.304156	0.00208902	0.0296265
LOC103973561	1.20528	4.74134	0.00208945	0.0296265
[truncated: 654 more rows]

## Sheet: Bacillus_48h_Full_List
NCBI Gene	log2FC	log2CPM	PValue	FDR
LOC103968644	5.15778	5.74403	8.72132e-32	2.47197e-27		Statistics and list of 1530 differentially expressed genes in treatment Bacillus 48h. See figure below.
LOC103972371	4.93919	4.0554	9.53496e-22	1.35129e-17
LOC103998091	-6.60837	5.14395	1.19138e-20	1.12562e-16
LOC103968833	-4.23866	9.73619	3.08089e-19	2.18312e-15
LOC103980398	4.27412	6.10398	8.56549e-19	4.85561e-15
LOC103970139	3.89203	4.28301	1.81263e-18	8.56287e-15
LOC103971548	3.56961	4.18554	1.32306e-17	5.35727e-14
LOC103997319	6.12955	4.80505	2.19337e-17	7.77113e-14
LOC103986537	5.09188	4.54662	4.422e-17	1.39263e-13
LOC103996261	-3.50162	4.83492	5.70613e-17	1.61735e-13
LOC103986341	3.02834	4.65247	5.45146e-16	1.40469e-12
LOC103992310	5.06293	4.76241	7.07005e-14	1.66995e-10
LOC104000178	4.05678	8.1245	1.51338e-13	3.29963e-10
LOC103977175	-7.26345	2.14854	5.1754e-13	1.0478e-09
LOC103998703	4.53441	6.16606	7.2925e-13	1.37799e-09
LOC103977654	-4.44583	7.11085	1.29334e-12	2.29115e-09
LOC103986057	4.05638	4.17372	1.39975e-12	2.3338e-09
LOC103998486	-4.01971	3.99581	2.45607e-12	3.86749e-09
LOC103988171	4.32101	3.76905	4.00858e-12	5.83567e-09
LOC103995969	-5.76585	6.13117	4.11775e-12	5.83567e-09
LOC103996582	-3.67682	7.10902	5.70385e-12	7.69857e-09
LOC103970798	-2.60301	5.3873	6.17285e-12	7.95288e-09
LOC103972273	5.06221	3.00597	7.51217e-12	9.25761e-09
LOC103990092	-3.51026	3.9448	1.0145e-11	1.19813e-08
LOC103996984	3.03264	5.185	1.39082e-11	1.57686e-08
LOC104000458	2.42643	5.47267	1.58527e-11	1.72819e-08
LOC103979997	6.09953	4.78545	2.23462e-11	2.27503e-08
LOC103975278	4.06219	4.74288	2.24742e-11	2.27503e-08
LOC103992086	2.75006	3.94246	2.4e-11	2.34571e-08
LOC104001019	4.06854	5.20216	2.49637e-11	2.35857e-08
LOC103991938	-4.34768	11.434	2.61325e-11	2.38935e-08
LOC103999142	2.9069	4.5996	4.68541e-11	4.1501e-08
LOC103995106	-3.66933	5.10586	4.84612e-11	4.16238e-08
LOC103996584	-3.19763	5.9103	5.49511e-11	4.58098e-08
LOC103985522	4.42871	9.76509	8.81198e-11	7.1362e-08
LOC103971804	-2.13872	6.28387	9.99082e-11	7.8661e-08
LOC103984804	2.47484	4.22271	1.03012e-10	7.8913e-08
LOC103990019	5.88728	3.55757	1.45469e-10	1.08504e-07
LOC103999445	-4.40024	3.77583	2.01771e-10	1.46641e-07
LOC103975650	5.05052	6.13877	2.11686e-10	1.5e-07
LOC103984066	3.48774	4.53122	2.24209e-10	1.55e-07
LOC103988681	3.07386	6.90369	2.58636e-10	1.74542e-07
LOC103991700	-3.17598	5.49785	2.70297e-10	1.7817e-07
LOC103998816	4.28702	6.63067	2.79256e-10	1.79342e-07
LOC103998990	4.53593	3.93318	2.84731e-10	1.79342e-07
LOC103999795	-5.52055	2.16241	3.43863e-10	2.1188e-07
LOC103989081	4.35197	4.22122	4.18717e-10	2.50055e-07
LOC103985304	-5.35084	5.7444	4.23463e-10	2.50055e-07
LOC103972223	3.31539	5.74868	4.89136e-10	2.8294e-07
LOC104000746	-3.36272	7.82577	5.13476e-10	2.91079e-07
LOC103989649	4.60913	3.5733	7.71896e-10	4.28993e-07
LOC104000233	-5.70463	5.51512	1.0058e-09	5.48236e-07
LOC103992275	5.55778	6.44112	1.13283e-09	6.0583e-07
LOC103973318	-4.79977	3.75016	1.28851e-09	6.7193e-07
LOC103971058	-4.10555	3.79153	1.30384e-09	6.7193e-07
LOC103994454	3.28612	2.83038	1.40525e-09	7.11259e-07
LOC103991030	-7.44236	6.9662	1.63475e-09	8.129e-07
LOC103975648	3.50285	8.84484	2.08738e-09	1.02008e-06
LOC103972892	7.74509	2.46914	2.31276e-09	1.11107e-06
LOC103968611	3.92915	4.00821	2.80932e-09	1.32712e-06
LOC103976604	-4.10868	3.68219	3.6528e-09	1.69729e-06
LOC103977103	3.14805	4.35487	4.12944e-09	1.88782e-06
LOC103987935	3.8893	3.95531	5.94394e-09	2.67421e-06
LOC103969204	-2.32002	5.01601	8.18237e-09	3.62377e-06
LOC103990723	2.47011	9.02686	8.74539e-09	3.81353e-06
LOC103995933	2.10987	6.87418	9.2735e-09	3.97443e-06
LOC103973007	3.8903	4.86198	9.39482e-09	3.97443e-06
LOC103986984	3.64649	8.26089	1.14387e-08	4.76791e-06
LOC103973189	3.82909	4.58399	1.27381e-08	5.23258e-06
LOC103972957	5.17362	3.84099	1.34728e-08	5.45532e-06
LOC103969642	3.19619	6.05451	1.48347e-08	5.91739e-06
LOC103976855	2.00326	4.7384	1.50315e-08	5.91739e-06
LOC103985469	3.11677	4.33682	1.6992e-08	6.59753e-06
LOC103968966	-3.8014	7.33555	1.73173e-08	6.63299e-06
LOC103977207	2.92341	4.96335	1.82835e-08	6.90969e-06
LOC103999297	2.40157	4.7535	2.04072e-08	7.6108e-06
LOC103976685	-4.87974	2.34222	2.11098e-08	7.77061e-06
LOC103991952	2.22444	5.21626	2.17167e-08	7.89151e-06
LOC103989707	-8.68341	5.62824	2.34026e-08	8.3965e-06
LOC103990214	-4.88882	7.76939	2.38214e-08	8.43991e-06
LOC103991615	4.79424	5.22779	2.69399e-08	9.42696e-06
LOC103992743	3.35732	3.74099	2.79602e-08	9.66469e-06
LOC103980353	2.38667	5.94283	2.94213e-08	1.00472e-05
LOC103986066	-3.59098	6.676	3.13623e-08	1.04777e-05
LOC103981925	3.32797	4.07319	3.17589e-08	1.04777e-05
LOC103985947	-3.93732	3.98735	3.17909e-08	1.04777e-05
LOC103995977	-3.11828	4.52917	4.20952e-08	1.37143e-05
LOC103972451	3.48636	3.98473	4.55273e-08	1.46639e-05
LOC103981398	-4.15508	7.27918	4.69076e-08	1.49388e-05
LOC104000805	3.16802	4.8171	4.90059e-08	1.54336e-05
LOC103984127	4.51089	3.58254	5.07336e-08	1.58021e-05
LOC103976295	-2.53594	4.49701	5.16109e-08	1.59006e-05
LOC103985740	2.60299	4.17883	5.52973e-08	1.68532e-05
LOC103997416	2.8854	6.04292	5.63752e-08	1.69989e-05
LOC103970060	-1.67614	6.02449	6.6338e-08	1.97925e-05
LOC103990508	3.3309	7.82717	7.21629e-08	2.13061e-05
LOC103997697	-4.6663	6.11054	8.4443e-08	2.46748e-05
LOC103975738	3.23487	4.18884	8.7723e-08	2.53716e-05
LOC103976146	2.96851	6.97416	9.26608e-08	2.64332e-05
LOC103999329	8.58519	2.25245	9.32585e-08	2.64332e-05
LOC103979811	-1.90834	7.27021	1.06274e-07	2.9824e-05
LOC103992069	-2.4486	5.00288	1.12814e-07	3.13489e-05
LOC103975027	3.87632	8.4144	1.14905e-07	3.16201e-05
LOC103990621	2.6578	3.94207	1.16093e-07	3.16399e-05
LOC103968821	-3.92645	4.87864	1.17633e-07	3.17156e-05
LOC103991493	2.40025	6.09858	1.18609e-07	3.17156e-05
LOC103992496	3.43246	3.18063	1.29703e-07	3.43581e-05
LOC103998017	-3.88599	2.64294	1.41338e-07	3.68102e-05
LOC103993418	2.68028	5.80705	1.41558e-07	3.68102e-05
LOC103973577	4.03258	5.76098	1.55805e-07	4.01467e-05
LOC103991382	-4.66837	3.4904	1.65999e-07	4.2388e-05
LOC103991748	4.45469	6.66092	1.67648e-07	4.2427e-05
LOC103996563	4.99768	4.17624	1.8913e-07	4.74399e-05
LOC103984509	-4.25593	5.58423	1.94756e-07	4.84226e-05
LOC103968739	2.94403	4.08955	1.99338e-07	4.91306e-05
LOC103977720	2.3257	3.49399	2.13789e-07	5.22381e-05
LOC103998589	1.90328	3.86562	2.19145e-07	5.30016e-05
LOC103998622	3.12584	4.08249	2.20653e-07	5.30016e-05
LOC103987473	3.96807	4.88255	2.25132e-07	5.3623e-05
LOC103981555	-6.38402	0.197692	2.27204e-07	5.36657e-05
LOC103969234	3.26553	3.05489	2.46789e-07	5.73405e-05
LOC103984099	5.15057	6.03512	2.46809e-07	5.73405e-05
LOC103982557	2.72491	7.41412	2.65218e-07	6.10468e-05
LOC103988712	-2.34994	3.28806	2.67069e-07	6.10468e-05
LOC103996634	-2.4545	4.02142	2.76948e-07	6.27986e-05
LOC103979711	2.85503	4.35064	2.84037e-07	6.38949e-05
LOC103972300	6.88803	9.94279	2.8693e-07	6.40373e-05
LOC103980249	-3.06559	4.00164	2.93587e-07	6.48292e-05
LOC103992690	3.28108	8.55179	2.95053e-07	6.48292e-05
LOC103991268	-2.89385	6.51077	3.04666e-07	6.64265e-05
LOC103998006	-4.1163	5.46339	3.1366e-07	6.78655e-05
LOC103968345	4.38797	5.8046	3.24102e-07	6.95936e-05
LOC103987432	-3.41125	3.08422	3.3957e-07	7.23666e-05
LOC103982876	-2.26208	5.08452	3.53335e-07	7.47383e-05
LOC103968378	3.32117	6.23639	3.81458e-07	7.9708e-05
LOC103968359	-4.2845	5.50936	3.8509e-07	7.9708e-05
LOC103999540	2.31462	6.14062	3.85267e-07	7.9708e-05
LOC103989540	-2.44294	5.65507	4.31037e-07	8.85313e-05
LOC103986775	3.27107	6.44166	4.38253e-07	8.93659e-05
LOC103970414	2.05309	5.01337	4.53314e-07	9.14818e-05
LOC103997178	3.17976	6.62482	4.55085e-07	9.14818e-05
LOC103993281	2.55085	4.4183	4.63491e-07	9.25153e-05
LOC103989406	-2.51887	3.99388	4.74972e-07	9.3791e-05
LOC103991966	4.71829	4.70746	4.765e-07	9.3791e-05
LOC103991273	-3.13625	6.30295	4.90124e-07	9.58074e-05
LOC103986197	4.91016	4.89717	4.94994e-07	9.60967e-05
LOC103990684	-1.80472	4.24849	5.09142e-07	9.75381e-05
LOC103998782	3.21983	1.96332	5.09302e-07	9.75381e-05
LOC103993803	-3.0583	8.95745	5.43709e-07	0.000103429
LOC103998196	-6.59232	4.73962	5.83399e-07	0.000110239
LOC103978936	-2.0123	7.84216	5.88699e-07	0.000110504
LOC103972093	-3.44489	5.96556	6.50314e-07	0.000121266
LOC103996274	3.49702	4.89394	6.66847e-07	0.000123537
LOC103982343	6.57472	2.00209	6.92549e-07	0.000127465
LOC103987834	-2.34641	3.23162	7.19915e-07	0.000130106
LOC103971808	-2.56509	4.40196	7.20106e-07	0.000130106
LOC104000872	1.80715	5.3553	7.20672e-07	0.000130106
LOC103976605	-3.54886	6.58003	7.33577e-07	0.000131598
LOC103991639	4.21216	6.32944	7.55073e-07	0.000134602
LOC103987692	2.83453	7.98006	8.56836e-07	0.000151789
LOC103992213	4.40431	6.72706	9.09622e-07	0.000160139
LOC103991942	1.772	5.29915	9.24244e-07	0.000161708
LOC103972809	2.1179	3.87651	9.41589e-07	0.000163732
LOC103978608	-2.39372	4.56009	9.50033e-07	0.000164193
LOC103974011	2.91606	3.0972	9.6335e-07	0.000165486
LOC103999555	5.61443	2.09292	1.00519e-06	0.000171633
LOC103987361	3.02038	7.62421	1.02457e-06	0.000173895
LOC103984094	-2.55353	2.95584	1.03365e-06	0.000174391
LOC103991501	-8.26872	2.88633	1.09285e-06	0.000183203
LOC103978530	-5.18371	3.04073	1.0988e-06	0.000183203
LOC103987112	-1.6668	4.60791	1.11497e-06	0.000184811
LOC103979318	2.76844	4.56612	1.17819e-06	0.000194155
LOC103972357	-1.85344	4.96405	1.21031e-06	0.000197598
LOC103970068	2.31782	3.13023	1.21303e-06	0.000197598
LOC103971468	-2.7152	5.73421	1.2968e-06	0.000210037
LOC103977424	-3.3663	4.63391	1.30601e-06	0.000210327
LOC103985911	6.11342	5.80592	1.32474e-06	0.000212138
LOC103991544	2.88264	3.64807	1.37128e-06	0.000218357
LOC103991553	-3.98696	9.41725	1.41097e-06	0.000222304
LOC103972782	3.34096	6.07538	1.41926e-06	0.000222304
LOC103985118	-3.52036	4.13317	1.41959e-06	0.000222304
LOC103983858	6.0452	3.3729	1.4779e-06	0.000229615
LOC103985192	3.27509	7.00134	1.48351e-06	0.000229615
LOC103988698	1.7971	5.42314	1.49058e-06	0.000229615
LOC103999997	6.061	4.28635	1.51045e-06	0.000231418
LOC103992798	-6.42393	1.24885	1.54216e-06	0.000235005
LOC103986727	3.588	6.35543	1.63016e-06	0.000247087
LOC103997576	4.3887	8.04815	1.65609e-06	0.000249682
LOC103990191	-2.08577	5.56048	1.67458e-06	0.000251134
LOC103968413	-3.47069	3.43628	1.70555e-06	0.000254432
LOC103997682	3.57164	7.70236	1.75306e-06	0.000260151
LOC103995679	3.55216	3.99504	1.7865e-06	0.000263732
LOC103999704	3.4178	7.41225	1.81602e-06	0.000266701
LOC103992465	-2.70954	6.78393	1.86082e-06	0.000271872
LOC103985248	2.63751	4.58066	1.87749e-06	0.000272901
LOC103996583	-3.74807	4.58769	1.91424e-06	0.000276822
LOC103988166	2.49618	5.03917	1.9495e-06	0.000278407
LOC103987158	-2.6045	7.02389	1.95281e-06	0.000278407
LOC103997830	2.97864	6.70198	1.96585e-06	0.000278407
LOC103968471	2.81405	4.27711	1.96605e-06	0.000278407
LOC103992184	4.30877	5.51255	1.97431e-06	0.000278407
LOC103994073	-2.99851	6.26351	2.02706e-06	0.000284431
LOC103995360	2.32485	5.12429	2.15122e-06	0.000300345
LOC103973607	5.16886	5.29574	2.16167e-06	0.000300345
LOC103986142	2.7946	4.45895	2.22519e-06	0.000307662
LOC103981440	-2.3648	3.78709	2.23975e-06	0.000308173
LOC103991469	-1.53342	5.70437	2.30468e-06	0.000315575
LOC103985615	2.75103	5.93322	2.34347e-06	0.000319343
LOC103971974	2.40797	6.87893	2.51622e-06	0.000339913
LOC103991761	-1.74468	3.81444	2.51841e-06	0.000339913
LOC103995332	2.49875	4.25713	2.54777e-06	0.000342246
LOC103975054	4.86878	6.30274	2.59161e-06	0.000346493
LOC103976405	5.04081	2.32888	2.9292e-06	0.00038979
LOC103994878	4.5495	4.26349	3.11739e-06	0.000411287
LOC103999177	3.85532	5.23956	3.13065e-06	0.000411287
LOC103971061	-2.82337	4.25589	3.13428e-06	0.000411287
LOC103978246	2.37818	3.94817	3.18063e-06	0.000414735
LOC103990849	3.3316	5.57914	3.18982e-06	0.000414735
LOC103996223	-3.46099	4.46694	3.25315e-06	0.000421038
LOC103994134	2.2625	6.43261	3.2868e-06	0.00042346
LOC103985993	-4.84633	4.51351	3.38356e-06	0.000431318
LOC103985017	3.46168	4.086	3.39267e-06	0.000431318
LOC103988314	3.36402	3.64745	3.39345e-06	0.000431318
LOC103984746	2.60363	3.43092	3.43917e-06	0.000435178
LOC103988469	-3.32321	2.38772	3.47698e-06	0.000436513
LOC103997079	-5.65107	5.11476	3.50986e-06	0.000436513
LOC103973250	-1.61236	7.1359	3.51574e-06	0.000436513
LOC103981366	3.31572	7.24376	3.52006e-06	0.000436513
LOC103989178	-1.83131	5.12812	3.53687e-06	0.000436513
LOC103989668	3.80551	5.61405	3.54981e-06	0.000436513
LOC103992375	3.25941	7.22365	3.55753e-06	0.000436513
LOC103983591	-3.49821	4.80409	3.70621e-06	0.000452796
LOC104000996	3.27101	3.40567	3.87982e-06	0.000471973
LOC104000016	5.88306	2.72837	3.91557e-06	0.000472011
LOC103968921	3.0317	7.10432	3.9231e-06	0.000472011
LOC103987519	-3.87354	7.98441	3.93009e-06	0.000472011
LOC103982033	-1.74322	5.54524	3.95404e-06	0.000472883
LOC103981761	-2.61154	4.26207	4.02234e-06	0.00047903
LOC103970092	1.92974	5.51769	4.07083e-06	0.000481533
LOC103992727	3.4441	2.54931	4.07734e-06	0.000481533
LOC103989587	3.51641	4.06419	4.29371e-06	0.000504983
LOC103982822	2.4218	4.22946	4.42639e-06	0.000518436
LOC103970293	3.59883	3.74576	4.4583e-06	0.000520024
LOC103982266	2.56701	4.8129	4.56023e-06	0.000529734
LOC103974505	-2.44484	4.89389	4.59329e-06	0.000531397
LOC103983246	3.4455	6.9659	4.70046e-06	0.000541584
LOC103989972	3.15978	6.33855	4.72112e-06	0.000541763
LOC103994110	-3.01741	3.70742	4.84966e-06	0.000554269
LOC103978567	-2.17791	5.1902	4.87789e-06	0.000555257
LOC103996869	-2.50897	4.99952	4.92487e-06	0.000558362
LOC103972338	1.81643	6.86826	4.95886e-06	0.000559975
LOC103977372	-2.59225	4.69783	5.11832e-06	0.000575689
LOC103996812	2.43449	3.37101	5.17916e-06	0.00058023
LOC103996389	2.36488	7.04257	5.51711e-06	0.000615657
LOC103972185	1.65185	5.46812	5.63008e-06	0.0006258
LOC103993558	2.55274	5.04224	5.66735e-06	0.000627481
LOC103993072	3.09486	4.3675	5.89466e-06	0.000650109
LOC103975908	3.68492	6.41882	6.09971e-06	0.000670117
LOC103987223	2.74238	6.10631	6.22558e-06	0.000681304
LOC103981828	2.38122	4.54886	6.53478e-06	0.000712392
LOC103978481	2.44084	5.18657	6.94058e-06	0.00075373
LOC103986608	3.15335	7.8476	7.01252e-06	0.000758637
LOC103971388	1.83546	4.79275	7.26442e-06	0.000782901
LOC103983700	-3.34658	4.62297	7.35183e-06	0.000789319
LOC103989220	2.66854	6.59654	7.42164e-06	0.000793807
LOC103997261	3.25639	5.21989	7.62093e-06	0.000812059
LOC103983920	-2.8427	3.08716	7.76958e-06	0.000824798
LOC103991989	-1.51285	7.15848	7.83136e-06	0.000828254
LOC103986336	-1.70933	6.22204	7.86449e-06	0.000828666
LOC103995854	-3.79237	8.67163	7.95413e-06	0.000835007
LOC103998694	2.72648	6.44937	8.06938e-06	0.00084398
LOC103976149	2.97087	6.62092	8.44977e-06	0.000880515
LOC103995299	-3.59253	5.22946	8.5003e-06	0.000882537
LOC103984200	3.43533	3.43002	8.68895e-06	0.000898831
LOC103978167	1.98814	4.91314	8.81625e-06	0.000908683
LOC103978375	-2.31708	5.65341	8.85219e-06	0.000909081
LOC103987744	-3.7443	4.88041	8.91772e-06	0.000912505
LOC103988079	2.87048	3.50485	9.02652e-06	0.000920316
LOC103988575	2.92636	5.29426	9.12611e-06	0.000927135
LOC104000318	2.78198	4.88802	9.30127e-06	0.000941555
LOC103978505	1.91152	8.42559	9.38849e-06	0.000947002
LOC103989689	1.8072	6.23033	9.51352e-06	0.00095621
LOC103971909	4.0309	3.40986	1.01072e-05	0.00101162
LOC103986111	4.72085	2.32836	1.01362e-05	0.00101162
LOC103992662	-2.05037	5.24413	1.03275e-05	0.00102354
LOC103983643	3.71798	8.7966	1.03279e-05	0.00102354
LOC103989635	1.96737	7.96602	1.04555e-05	0.00103258
LOC103981200	-1.20087	6.12255	1.05079e-05	0.00103415
LOC103982338	2.60216	4.84673	1.05753e-05	0.00103718
LOC103969384	3.38913	3.91991	1.08308e-05	0.00105858
LOC103971621	-2.60731	5.11334	1.08822e-05	0.00105995
LOC103982188	-4.94979	2.58398	1.10306e-05	0.00107072
LOC103997989	-3.13681	3.21364	1.11428e-05	0.00107793
LOC103999271	-3.25233	3.53409	1.1404e-05	0.00109943
LOC103986849	-1.8185	4.2404	1.18074e-05	0.00113384
LOC103995862	-3.04684	8.60539	1.18412e-05	0.00113384
LOC103979035	3.1986	4.35801	1.18809e-05	0.00113384
LOC103973555	1.64629	4.7696	1.21831e-05	0.00115878
LOC103984965	2.39406	5.02334	1.23708e-05	0.00117238
LOC103981745	3.75951	7.65758	1.24088e-05	0.00117238
LOC103975090	4.2048	3.32424	1.28455e-05	0.00120572
LOC103972057	5.31057	4.17236	1.28467e-05	0.00120572
LOC103996978	-3.30907	5.99033	1.29532e-05	0.0012117
LOC103993732	1.85625	4.22073	1.3087e-05	0.00121684
LOC103995451	-1.67749	5.9138	1.3094e-05	0.00121684
LOC103978408	3.16701	5.58958	1.3238e-05	0.0012262
LOC103986672	-3.36066	7.22278	1.35145e-05	0.00124684
LOC103992780	-2.88863	3.17708	1.3646e-05	0.00124684
LOC103984981	-2.2554	4.05107	1.36901e-05	0.00124684
LOC103989769	-5.10147	3.16641	1.37059e-05	0.00124684
LOC103969546	2.27583	5.58351	1.37119e-05	0.00124684
LOC104000388	2.49993	3.40945	1.37248e-05	0.00124684
LOC103989101	-2.7292	4.60261	1.40024e-05	0.001268
LOC103987496	-2.54699	6.95856	1.40845e-05	0.00127137
LOC104000795	3.18987	5.97759	1.4159e-05	0.00127404
LOC103990215	-1.55782	3.56082	1.42985e-05	0.00128252
LOC103983379	-1.65809	10.3902	1.43998e-05	0.00128754
LOC103974976	-3.51102	6.14462	1.46186e-05	0.00130299
LOC103985063	-1.48468	6.08767	1.4842e-05	0.00131875
LOC103999162	-2.04277	7.86259	1.5128e-05	0.00133855
LOC103982147	4.34101	2.80255	1.51593e-05	0.00133855
LOC103993224	2.82079	4.83063	1.52889e-05	0.00134581
LOC103982521	-7.33668	0.834285	1.54932e-05	0.00135956
LOC103981754	3.72574	4.41876	1.55948e-05	0.00136425
LOC103977559	2.80053	3.22983	1.60972e-05	0.00140388
LOC103983939	3.53174	5.48301	1.61877e-05	0.00140743
LOC103973941	2.51614	7.87411	1.62697e-05	0.00141024
LOC103977190	2.17923	7.13799	1.67491e-05	0.00144418
LOC103995030	2.15935	2.79937	1.67631e-05	0.00144418
LOC103969209	-5.91759	4.17759	1.68192e-05	0.00144462
LOC103991479	2.00996	3.33885	1.71025e-05	0.00146013
LOC103969608	3.69511	8.04688	1.71028e-05	0.00146013
LOC103977088	2.96733	8.81872	1.71933e-05	0.00146344
LOC103986087	2.79608	3.94472	1.74655e-05	0.00148216
LOC103981814	2.84835	9.07987	1.76406e-05	0.0014897
LOC103974136	-2.90777	5.8812	1.76594e-05	0.0014897
LOC103984579	3.51715	7.39572	1.79536e-05	0.00151002
LOC103968923	2.6938	2.9856	1.84445e-05	0.00154672
LOC103990342	2.7634	8.12554	1.86742e-05	0.00155877
LOC103973009	4.28682	1.52871	1.86983e-05	0.00155877
LOC104000889	2.20569	4.36564	1.87931e-05	0.00156062
LOC103995455	2.38163	8.00378	1.88786e-05	0.00156062
LOC103975993	2.76141	6.60138	1.88855e-05	0.00156062
LOC103980020	-5.14398	0.65981	1.89564e-05	0.00156192
LOC103980056	2.75132	4.54886	1.90174e-05	0.00156241
LOC103970629	3.58051	3.789	1.9284e-05	0.00157973
LOC103973161	2.47238	7.82936	2.0118e-05	0.0016433
LOC103989384	4.24348	3.69746	2.03236e-05	0.00165122
LOC103999685	-3.46638	2.38553	2.03315e-05	0.00165122
LOC103975328	-2.07739	6.2681	2.08955e-05	0.00169218
LOC103999774	2.98287	5.13269	2.10716e-05	0.00170158
LOC103989633	-6.8051	0.568324	2.12172e-05	0.00170297
LOC103974206	1.76319	5.49634	2.12674e-05	0.00170297
LOC103996704	1.86166	3.30627	2.12691e-05	0.00170297
LOC103979211	-1.70118	4.75956	2.17762e-05	0.00173507
LOC103976082	2.01502	4.54599	2.17925e-05	0.00173507
LOC103980967	4.04285	1.76839	2.22258e-05	0.00176462
LOC103987484	5.13171	1.42217	2.25318e-05	0.00178391
LOC103982699	2.2001	4.16179	2.2772e-05	0.00179791
LOC103998502	-2.05243	4.01732	2.2997e-05	0.00181063
LOC103988680	2.71725	4.88116	2.31432e-05	0.00181709
LOC103982340	2.80253	6.4883	2.32996e-05	0.00182432
LOC103987539	3.239	6.18508	2.34913e-05	0.00183426
LOC103977893	-2.46703	4.05084	2.41316e-05	0.00187908
LOC103982220	-3.64573	2.4845	2.48232e-05	0.0019266
LOC103988032	2.7159	3.18689	2.49144e-05	0.0019266
LOC103991198	-2.73639	2.23825	2.49458e-05	0.0019266
LOC103989012	3.89586	4.4702	2.5229e-05	0.00194318
LOC103991319	3.90656	3.68705	2.5519e-05	0.0019574
LOC103976770	2.70089	5.65542	2.55517e-05	0.0019574
LOC103982684	-2.71536	3.61115	2.60627e-05	0.00199048
LOC103992196	1.51766	4.09587	2.61815e-05	0.00199048
LOC103989554	3.40075	5.26914	2.6249e-05	0.00199048
LOC103972806	2.59555	6.43451	2.62645e-05	0.00199048
LOC103991939	-2.00889	7.48509	2.64522e-05	0.00199936
LOC103990178	3.86618	0.996338	2.69067e-05	0.00202831
LOC103985778	1.96086	4.8547	2.70665e-05	0.00203494
LOC103976791	-2.05345	4.6215	2.76031e-05	0.0020698
LOC103970428	3.63785	5.97076	2.81314e-05	0.00210385
LOC103980161	1.57529	4.7764	2.86166e-05	0.00213449
LOC103987889	3.83076	1.97726	2.89609e-05	0.00214563
LOC103995572	-3.54118	2.57552	2.89722e-05	0.00214563
LOC103981955	2.3233	3.57198	2.89929e-05	0.00214563
LOC103999568	-3.47084	3.38943	2.92443e-05	0.00215555
LOC103980706	3.33762	2.31798	2.92792e-05	0.00215555
LOC103971078	4.14196	6.57545	2.94953e-05	0.00216275
LOC103993530	4.46524	3.9416	2.95295e-05	0.00216275
LOC103992054	2.35026	4.7676	2.97036e-05	0.0021699
LOC103987611	-2.97262	6.78738	2.9807e-05	0.00217185
LOC103971903	-1.887	3.88548	3.11318e-05	0.00226256
LOC103994887	-2.18704	3.32378	3.21664e-05	0.00233178
LOC103968499	-1.5948	7.38191	3.26995e-05	0.00236438
LOC103998749	1.26414	3.79897	3.3754e-05	0.00243441
LOC103982334	-1.68705	6.77591	3.50033e-05	0.00251269
LOC103993570	1.37494	4.60968	3.51045e-05	0.00251269
LOC103984147	-5.91968	2.54133	3.51053e-05	0.00251269
LOC103984511	2.1661	5.57358	3.52068e-05	0.0025136
LOC103973002	2.6061	4.21052	3.56844e-05	0.0025413
LOC103982634	2.54493	2.57521	3.58677e-05	0.00254796
LOC103998494	4.11213	2.89558	3.59837e-05	0.00254981
LOC103971103	-2.24547	4.55117	3.63046e-05	0.00256613
LOC103996253	-1.80917	7.63325	3.68258e-05	0.0025965
LOC103997368	1.95398	3.36706	3.7362e-05	0.00262776
LOC103968977	1.88493	7.65751	3.81369e-05	0.00267366
LOC103979137	-1.99685	3.23143	3.82501e-05	0.00267366
LOC103974142	2.43927	7.01742	3.83174e-05	0.00267366
LOC103968395	-2.72225	7.07325	3.83918e-05	0.00267366
LOC103981365	1.41754	5.73524	3.85474e-05	0.00267791
LOC103997381	1.80257	5.45928	3.92357e-05	0.00271906
LOC103997977	-2.67545	0.878839	3.93567e-05	0.0027208
LOC103998483	-2.4788	2.9033	3.94819e-05	0.00272281
LOC103982509	-2.02387	3.91248	3.97631e-05	0.00273555
LOC103995161	1.45568	6.16154	4.03932e-05	0.00277217
LOC103975699	2.13148	7.293	4.06356e-05	0.00278206
LOC103982031	3.49784	6.55442	4.21032e-05	0.00287234
LOC103993960	2.43499	4.10629	4.21774e-05	0.00287234
LOC103998306	2.51689	6.14225	4.22582e-05	0.00287234
LOC103992750	-3.26901	3.4939	4.2421e-05	0.00287434
LOC103998289	-1.60956	6.4898	4.24905e-05	0.00287434
LOC103990631	1.98554	4.05161	4.38516e-05	0.00295297
LOC103997423	2.55506	6.11914	4.38611e-05	0.00295297
LOC103999622	5.52082	2.05783	4.41822e-05	0.00296754
LOC103971966	-4.26324	3.96572	4.46381e-05	0.00299107
LOC103987488	1.20814	5.01503	4.50434e-05	0.00301111
LOC103977123	-2.0667	6.42313	4.52485e-05	0.0030177
LOC103972920	1.83153	2.51434	4.54687e-05	0.00302527
LOC103990113	2.15556	3.05478	4.58455e-05	0.00303698
LOC103980196	-4.23707	5.39133	4.58589e-05	0.00303698
LOC103984472	-1.58036	5.14827	4.61079e-05	0.00304634
LOC103974412	1.35531	6.17842	4.76183e-05	0.00313882
LOC103976840	-5.50504	0.0824676	4.78119e-05	0.00313971
LOC103987224	2.29383	6.96563	4.78533e-05	0.00313971
LOC103995265	2.09796	3.75338	4.8094e-05	0.00314196
LOC103993377	2.57839	6.95508	4.81093e-05	0.00314196
LOC103987399	-1.67107	4.0719	4.83304e-05	0.00314282
LOC103991351	-1.73313	4.1925	4.83442e-05	0.00314282
LOC103983871	3.69112	5.73955	4.85698e-05	0.00315026
LOC103979212	1.60229	4.61996	4.87555e-05	0.00315508
LOC103985709	-3.96352	3.42921	4.90413e-05	0.00316634
LOC103977770	2.27594	4.42018	4.94948e-05	0.00318836
LOC103979118	3.72485	2.7388	4.98022e-05	0.00320089
LOC103970894	-1.68021	3.96348	5.02302e-05	0.00322052
LOC103994561	3.35732	3.04938	5.03349e-05	0.00322052
LOC103996933	-1.50286	3.69399	5.06784e-05	0.0032352
LOC103989933	2.51787	5.15958	5.0943e-05	0.00324479
LOC104000374	-1.66084	4.31183	5.15667e-05	0.0032706
LOC103995439	2.26481	3.8809	5.15791e-05	0.0032706
LOC103983272	-2.12505	4.23641	5.33463e-05	0.0033694
LOC103994690	-2.49879	2.71498	5.3375e-05	0.0033694
LOC103985846	2.43041	4.76776	5.38573e-05	0.00339229
LOC103972766	2.51529	6.02717	5.40231e-05	0.00339519
LOC103986793	-1.9354	7.33146	5.50107e-05	0.00344961
LOC103998389	-3.83473	3.40987	5.53028e-05	0.00346027
LOC103981620	1.89611	3.76267	5.59682e-05	0.00349419
LOC103992187	3.30036	2.87506	5.62124e-05	0.00350172
LOC103975902	-1.38415	5.60756	5.69908e-05	0.00354243
LOC103985626	3.20411	2.58231	5.79772e-05	0.00359586
LOC103977717	-3.55743	6.13434	5.83462e-05	0.00361084
LOC103986158	-2.14612	3.91739	5.90924e-05	0.00364905
LOC104000650	1.89013	4.11046	6.0893e-05	0.00375171
LOC103975927	-1.20856	5.08369	6.10196e-05	0.00375171
LOC103996856	-2.35	4.70037	6.15868e-05	0.00377332
LOC103968541	2.55744	3.84598	6.16372e-05	0.00377332
LOC104000325	2.07218	4.73868	6.2228e-05	0.00379364
LOC103974927	1.86264	3.52923	6.22369e-05	0.00379364
LOC103986295	1.40414	4.92275	6.25451e-05	0.00380425
LOC103981843	-1.828	9.46132	6.2712e-05	0.00380623
LOC103977163	1.82607	6.58633	6.32267e-05	0.00382927
LOC104001037	2.83903	10.2583	6.33868e-05	0.00383078
LOC103989206	-1.68712	4.72797	6.40526e-05	0.00386278
LOC103999794	1.87213	5.98719	6.44146e-05	0.00387636
LOC103989098	2.92953	8.92308	6.46444e-05	0.00388195
LOC103991591	2.79966	5.98399	6.5208e-05	0.00390752
LOC103969254	1.32612	5.01053	6.53844e-05	0.00390982
LOC103992844	-1.87814	7.98113	6.6334e-05	0.00395826
LOC103975427	3.82793	5.62493	6.66235e-05	0.00396115
LOC103989339	-2.8944	6.9253	6.6662e-05	0.00396115
LOC103992986	-3.39189	1.45995	6.71872e-05	0.003984
LOC103989107	2.20349	3.07261	6.74395e-05	0.00399062
LOC103997732	-2.58489	6.76784	6.77532e-05	0.00400083
LOC103993619	2.40111	4.19211	6.79182e-05	0.00400223
LOC103972620	-5.24413	2.24979	6.95699e-05	0.00409106
LOC103975211	-1.34981	5.98773	7.03299e-05	0.00412718
LOC103989244	-5.17806	0.808341	7.06799e-05	0.004134
LOC103995522	-3.29822	7.88294	7.07377e-05	0.004134
LOC103986414	1.63281	4.47049	7.09138e-05	0.00413576
LOC103980324	-1.87627	4.4848	7.14183e-05	0.00414844
LOC103978322	-3.33528	1.67036	7.14239e-05	0.00414844
LOC103981473	-2.57092	2.45653	7.2122e-05	0.00418042
LOC103977734	1.92215	4.68149	7.23598e-05	0.00418564
LOC103995217	1.746	4.93559	7.33915e-05	0.00423668
LOC103979664	-2.8971	3.64867	7.43655e-05	0.00428418
LOC103980720	-2.45318	4.85613	7.4683e-05	0.00429374
LOC103975098	2.07046	5.90701	7.52674e-05	0.0043182
LOC103987294	3.52382	3.13178	7.54803e-05	0.0043182
LOC103997566	3.13225	5.44067	7.55655e-05	0.0043182
LOC103977951	-3.24858	8.02552	7.62181e-05	0.00433894
LOC103984209	2.50308	7.14454	7.62346e-05	0.00433894
LOC103989221	4.36695	6.18147	7.64565e-05	0.00434285
LOC103969635	-2.60669	7.87963	7.66809e-05	0.00434688
LOC103997574	1.68632	4.8028	7.73067e-05	0.00437152
LOC103997286	3.04381	6.25233	7.7424e-05	0.00437152
LOC103971208	-3.81321	1.75433	7.81656e-05	0.00440462
LOC103982284	-2.01997	7.63187	7.92261e-05	0.00445552
LOC103976374	-4.30446	1.43046	7.97686e-05	0.00447521
LOC103969797	1.85599	4.8936	7.98919e-05	0.00447521
LOC103970742	2.86941	5.93501	8.14262e-05	0.00455216
LOC103991423	2.24046	4.65616	8.21759e-05	0.00458503
LOC103999306	-5.8626	0.527976	8.30932e-05	0.0046271
LOC103991542	-2.91565	2.3844	8.34796e-05	0.0046395
LOC103990319	1.86274	4.57177	8.51033e-05	0.00472049
LOC103978549	-1.52778	5.37103	8.69533e-05	0.00481368
LOC103981061	3.67985	2.32299	8.7448e-05	0.00483163
LOC103974970	6.2208	2.4812	8.90074e-05	0.00490822
LOC103987025	-2.35789	5.49185	9.02685e-05	0.00496799
LOC103989382	2.07308	4.50929	9.04418e-05	0.00496799
LOC103983145	1.94527	3.38641	9.12272e-05	0.00500144
LOC103988916	-1.83353	5.83504	9.1448e-05	0.00500387
LOC103971281	-4.11762	4.39723	9.21352e-05	0.00502468
LOC103982664	1.79079	5.61871	9.2183e-05	0.00502468
LOC103984182	-3.60949	5.85006	9.40525e-05	0.00511674
LOC103984022	1.59352	4.57127	9.4703e-05	0.00514226
LOC103986844	7.56813	1.75409	9.59022e-05	0.00519742
LOC103968681	-3.53954	1.37429	9.64359e-05	0.00521637
LOC103988759	-3.46877	5.6925	9.75025e-05	0.00526402
LOC103984030	3.62117	3.25978	9.80321e-05	0.00528076
LOC103982723	-1.88762	4.31858	9.81852e-05	0.00528076
LOC103990407	-1.25322	3.99726	9.94671e-05	0.00533128
LOC103973111	-1.85122	7.26749	9.95006e-05	0.00533128
LOC103997093	-2.61739	5.06846	9.98496e-05	0.00533988
LOC103977957	3.74445	4.03921	0.000100908	0.00538632
LOC103993324	-1.4806	4.41813	0.000101456	0.00540538
LOC103992106	-1.47124	6.04452	0.000102059	0.00542168
LOC103986621	2.78363	5.0368	0.000102144	0.00542168
LOC103983136	3.48464	5.38963	0.00010237	0.00542351
LOC103981451	2.44563	3.04819	0.000102566	0.00542378
LOC103979752	1.70117	4.11628	0.000103033	0.00543829
LOC103999647	2.51288	7.5402	0.000104933	0.00552829
LOC103970050	1.62646	2.93739	0.000105328	0.00553881
LOC103978174	-2.90504	3.09584	0.000107047	0.00561877
LOC103975573	4.90705	1.99624	0.000107274	0.00562026
LOC103980966	-1.68325	5.48667	0.0001086	0.00567926
LOC103969562	2.66554	3.06375	0.000110228	0.00575379
LOC103981847	-1.65261	8.7085	0.000111071	0.00578604
LOC103991408	-3.02309	5.71924	0.000111254	0.00578604
LOC103984498	2.39837	5.23382	0.000113621	0.00589264
LOC103991134	2.29301	2.52444	0.00011372	0.00589264
LOC103997462	-2.73782	5.43923	0.000115187	0.00594778
LOC103992644	-1.41146	7.40528	0.000115204	0.00594778
LOC103988322	1.82289	4.54615	0.000116839	0.00600359
LOC103976708	-2.24161	2.47128	0.000116879	0.00600359
LOC103990705	1.57866	4.76141	0.00011692	0.00600359
LOC103971040	1.87073	4.05761	0.000118705	0.00608424
LOC103971145	3.21452	2.06617	0.000120185	0.00614897
LOC103986086	-6.4731	1.73252	0.000120983	0.00616524
LOC103995322	3.94722	3.52291	0.000121073	0.00616524
LOC103975647	4.11849	3.51879	0.000121156	0.00616524
LOC103997387	3.06094	4.27019	0.000121844	0.00618913
LOC103988072	1.5552	4.40143	0.000122957	0.00623452
LOC103981792	-2.27081	7.86664	0.000123394	0.00624548
LOC103999145	-2.27137	1.82156	0.000124494	0.00628994
LOC103999644	2.67753	7.02066	0.000125254	0.00631706
LOC103977753	-2.00794	4.58885	0.000126009	0.00634389
LOC103977049	2.36165	6.2167	0.000127433	0.00640419
LOC103998933	2.64461	3.04406	0.000128563	0.00643519
LOC103989650	-1.75981	4.70333	0.000128694	0.00643519
LOC103984194	3.78741	7.08003	0.000128731	0.00643519
LOC103987655	3.88735	4.68653	0.000129334	0.00645394
LOC103984468	1.59204	3.21271	0.000130971	0.00652414
LOC103984897	-1.26082	4.90372	0.000132841	0.00660568
LOC103995646	-2.32146	5.56814	0.000133304	0.00660702
LOC103973015	1.94033	3.94967	0.000133363	0.00660702
LOC104000844	-1.80835	5.32783	0.000133567	0.00660702
LOC103995818	-1.69812	3.5769	0.000134502	0.00664169
LOC103975557	-2.34391	9.09473	0.000134884	0.00664894
LOC103973979	-3.48326	0.722893	0.000135432	0.00665699
LOC103982683	-1.35134	5.8708	0.000135517	0.00665699
LOC103992043	2.5329	4.40197	0.000136434	0.00669045
LOC103970511	-1.64273	3.22396	0.000137136	0.00671325
LOC103993926	2.08718	4.03098	0.000138388	0.00676288
LOC103998260	6.98496	0.352969	0.000139882	0.00681313
LOC103984169	3.16806	4.74894	0.000139897	0.00681313
LOC103970559	3.41242	0.685713	0.000140311	0.00681957
LOC103969480	1.81421	6.06414	0.00014051	0.00681957
LOC103973175	-3.63886	4.31533	0.000141066	0.00683348
LOC103988777	-1.97182	4.99627	0.000141279	0.00683348
LOC103973055	-1.53983	5.09795	0.000144041	0.0069445
LOC103992861	2.84005	4.05792	0.000144064	0.0069445
LOC103985111	4.38024	5.87772	0.000145422	0.00699804
LOC103996725	-2.45743	3.28925	0.0001466	0.00704278
LOC103984996	1.73088	3.5608	0.000147003	0.00705019
LOC103993237	2.50775	5.06336	0.00014773	0.00707307
LOC103989402	2.04887	4.8823	0.000148014	0.00707473
LOC103987091	-3.83093	2.31874	0.000148987	0.00710924
LOC103983124	1.64564	6.97716	0.000150451	0.00714827
LOC103984305	1.74036	4.48907	0.00015052	0.00714827
LOC103999905	4.51016	5.14496	0.000150562	0.00714827
LOC104000655	-1.64226	3.59042	0.000152029	0.00720585
LOC103984245	1.17203	4.46169	0.000154548	0.00731304
LOC103997701	2.36787	5.82962	0.000155505	0.00734608
LOC103994478	-1.58957	4.0172	0.000155926	0.00735367
LOC103984567	2.34721	5.8053	0.000163616	0.00770352
LOC103983138	-2.46701	4.40736	0.000164699	0.00774168
LOC104000409	2.46008	3.72206	0.000165783	0.00777971
LOC103976586	-3.67725	6.34779	0.000166121	0.00778206
LOC103970175	1.41864	6.02467	0.000166382	0.00778206
LOC104000337	2.78546	6.5979	0.000167463	0.00781974
LOC103987141	1.73054	6.51539	0.000167841	0.00782449
LOC103983422	-2.0263	5.50119	0.000168424	0.00783877
LOC103975635	1.65527	4.24158	0.000169543	0.0078779
LOC103976748	-2.99897	0.508328	0.000170698	0.00791333
LOC103996907	3.23263	3.20613	0.000170871	0.00791333
LOC103993842	1.30114	4.83241	0.000171143	0.00791333
LOC103996881	2.22277	6.55777	0.000172314	0.00795453
LOC103980584	3.58768	5.83826	0.000173071	0.00796639
LOC103975791	1.99065	1.91787	0.000173133	0.00796639
LOC103986119	1.90134	4.05556	0.000174041	0.00799516
LOC103978235	2.13028	4.97712	0.000175369	0.0080206
LOC103987063	1.53409	5.22403	0.000175413	0.0080206
LOC103976772	-2.31327	4.64673	0.000175618	0.0080206
LOC103980156	1.25065	5.76355	0.000175727	0.0080206
LOC103981601	-3.98667	3.67737	0.000177001	0.00805717
LOC103973205	1.49026	3.41384	0.000177096	0.00805717
LOC103983600	-1.1986	5.83081	0.000177554	0.00806506
LOC103997578	5.29419	2.12564	0.00018039	0.00817406
LOC103972115	2.76501	7.2849	0.000180605	0.00817406
LOC103971944	4.80451	3.10776	0.000180819	0.00817406
LOC103982262	1.11616	4.83605	0.000181993	0.00821402
LOC103997547	4.23058	0.238062	0.000182877	0.00824079
LOC103972079	1.72291	6.55504	0.000183305	0.00824698
LOC103994094	-2.78675	4.36005	0.000184882	0.00830475
LOC103977099	1.4181	4.5023	0.000185579	0.00832289
LOC103992145	-1.629	4.69752	0.000186801	0.00836443
LOC103996538	1.77309	5.56344	0.000187166	0.00836756
LOC103983899	3.17689	5.66386	0.000188861	0.00842112
LOC103995323	1.52383	4.04105	0.000188961	0.00842112
LOC103975649	3.13311	7.11703	0.000189374	0.00842112
LOC103973427	-1.99237	7.36608	0.000189552	0.00842112
LOC103968717	1.8304	2.16951	0.000190538	0.00845167
LOC103985511	1.52442	4.48048	0.000191539	0.00846918
LOC103969488	2.58697	3.75208	0.000191627	0.00846918
LOC103999102	-2.81001	4.81118	0.000191829	0.00846918
LOC103984145	3.0929	5.72033	0.000193619	0.00853295
LOC103986263	2.49168	4.4236	0.000193876	0.00853295
LOC103993551	-2.72762	7.54191	0.000195818	0.00860506
LOC103977858	3.41612	1.6615	0.000198067	0.0086904
LOC103986381	7.30458	-0.171422	0.000199918	0.00875809
LOC103970096	2.44503	3.0764	0.000200234	0.00875839
LOC103969700	1.69837	3.88263	0.00020246	0.00884212
LOC103970359	-1.66306	5.49986	0.000204334	0.00891023
LOC103993671	1.04248	6.05842	0.000205818	0.00896116
LOC103974563	2.53103	5.48699	0.000206852	0.00897473
LOC103990320	4.02098	3.49668	0.000207377	0.00897473
LOC103980893	2.81994	10.5088	0.000207456	0.00897473
LOC103973880	1.46524	5.62795	0.00020758	0.00897473
LOC103972143	2.83007	9.06754	0.000207781	0.00897473
LOC103999944	-2.97794	2.84885	0.00020803	0.00897473
LOC103998815	2.56105	4.65946	0.00020867	0.00898866
LOC103997793	-2.16609	5.25016	0.000210721	0.00906324
LOC103990422	1.70206	2.7274	0.000211507	0.00908327
LOC103983935	2.00962	4.16401	0.000212951	0.00911009
LOC103994588	1.24396	4.4078	0.000212965	0.00911009
LOC103996580	2.10358	3.07273	0.000213096	0.00911009
LOC103973155	2.1185	6.59079	0.000213598	0.0091178
LOC103994607	-1.82362	6.67795	0.000214187	0.00912922
LOC103983189	2.00211	5.04881	0.000214906	0.00914608
LOC103980815	1.89491	6.7324	0.000216598	0.00920426
LOC103993416	1.85347	4.38398	0.000218517	0.00927193
LOC103999922	-1.87685	5.99839	0.00021963	0.00930018
LOC103989247	1.89593	2.80484	0.000219839	0.00930018
LOC103978746	2.33365	7.70497	0.000220819	0.00932772
LOC103990082	-1.68373	9.13052	0.000221849	0.00935194
LOC103968910	1.71921	4.04632	0.000222052	0.00935194
LOC103986790	-1.84592	4.65543	0.000223613	0.00940367
LOC103989410	2.11443	7.26488	0.000224489	0.00942654
LOC103985989	1.3756	4.80445	0.000225031	0.00943533
LOC103975096	1.79401	5.83666	0.000226633	0.00948389
LOC103992010	2.18079	3.10137	0.000226947	0.00948389
LOC103968862	4.06798	1.48131	0.000227193	0.00948389
LOC103977778	-1.44893	4.53801	0.000227808	0.00949557
LOC103985241	7.4328	0.896796	0.000229983	0.00957177
LOC103968707	1.72313	3.31082	0.000230311	0.00957177
LOC103977146	2.80898	7.00624	0.00023109	0.00959005
LOC103976380	-4.87536	2.62962	0.000231746	0.00960324
LOC103986620	2.38537	1.86467	0.000232128	0.009605
LOC103969478	1.43936	5.54855	0.000232582	0.00960979
LOC103985044	-1.66321	2.7463	0.000233419	0.0096303
LOC103986353	2.09494	4.59196	0.000234155	0.00964665
LOC103989571	1.83729	3.18723	0.000236381	0.00972423
LOC103996009	1.80641	3.78399	0.000236866	0.00973006
LOC103968615	-1.69414	5.96961	0.000237545	0.00973317
LOC103988054	3.3117	3.96496	0.000238076	0.00973317
LOC103988578	1.74546	9.02715	0.000238235	0.00973317
LOC103992239	-2.48653	5.1025	0.000238316	0.00973317
LOC103999312	-1.47846	6.09195	0.000239176	0.00975427
LOC103996934	-2.24649	4.95887	0.000240315	0.0097866
LOC103976285	3.09983	5.68675	0.000241209	0.00980895
LOC103979164	-1.73183	4.42299	0.000242506	0.00983449
LOC103982337	-1.78234	8.93799	0.000242531	0.00983449
LOC103991037	2.09585	3.68863	0.000244763	0.00989666
LOC103988593	1.31322	4.57595	0.000244763	0.00989666
LOC103993364	-2.31035	7.95524	0.000245711	0.00992086
LOC103992170	1.8962	7.61302	0.000246284	0.00992985
LOC103969371	-2.17785	4.62189	0.00025086	0.0101
LOC103973211	2.60864	4.82355	0.000251743	0.0101085
LOC103994614	3.08107	3.98924	0.000251855	0.0101085
LOC103986289	2.42767	4.54403	0.000252142	0.0101085
LOC103998145	-1.91196	4.26615	0.000255288	0.0102202
LOC103977445	1.6079	4.72213	0.000256148	0.0102401
LOC103991669	1.56086	5.69238	0.000260796	0.0104113
LOC103982170	-1.70129	7.32742	0.000261357	0.010419
LOC103976599	5.44232	1.38029	0.000262933	0.0104671
LOC103995029	-1.55469	5.45258	0.000264561	0.0105158
LOC103990458	-1.49774	5.22331	0.000264899	0.0105158
LOC103991554	1.59046	4.99593	0.000266977	0.0105835
LOC103998407	2.45301	3.24623	0.000268967	0.0106475
LOC103970658	-3.88571	0.6115	0.000269821	0.0106664
LOC103977615	2.3957	8.97254	0.000270872	0.010693
LOC103991221	-1.35131	6.914	0.000272341	0.0107361
LOC103978784	2.94919	5.07539	0.000273438	0.0107644
LOC103999481	-4.69713	3.51935	0.000274314	0.0107839
LOC103986360	-1.72195	3.82595	0.000276079	0.0108382
LOC103986044	-1.95456	4.85208	0.000279146	0.0109435
LOC103993951	-1.90797	4.03837	0.000280107	0.010966
LOC103985191	-3.57626	2.84779	0.000280956	0.010984
LOC103975985	1.89074	4.86339	0.000282024	0.0110106
LOC103978845	4.76877	0.0906357	0.000283826	0.0110625
LOC103997997	-1.55768	7.03374	0.000284135	0.0110625
LOC103971108	-1.50134	7.8362	0.00028615	0.0111257
LOC103971986	4.30194	2.06896	0.000287446	0.0111553
LOC103998733	-2.18831	5.15284	0.000287699	0.0111553
LOC103997113	1.80367	6.90895	0.000288458	0.0111667
LOC103969349	1.64906	5.23312	0.000288779	0.0111667
LOC103992167	-2.97153	7.49469	0.000290187	0.0112058
LOC103998625	-1.51917	7.25444	0.000291047	0.0112237
LOC103999662	-2.23555	4.96622	0.000293616	0.0113074
LOC103998877	-1.77958	5.98652	0.000295018	0.011346
LOC103969308	1.87436	6.49599	0.000295844	0.0113623
LOC103969392	3.37274	1.66076	0.000296396	0.0113626
LOC103993289	3.54914	2.9821	0.000296653	0.0113626
LOC103979232	-2.17665	5.8894	0.000305112	0.0116709
LOC103972415	-2.75649	3.84317	0.000306174	0.0116957
LOC103977230	-1.40224	5.37147	0.000307423	0.0117276
LOC103974226	-2.09251	7.33582	0.000308124	0.0117385
LOC103994967	-1.86966	5.04088	0.00030909	0.0117595
LOC103977167	2.12622	4.3413	0.000309938	0.011776
LOC103999189	1.57575	4.37766	0.000313568	0.0118786
LOC103993408	-2.24944	3.7531	0.000313643	0.0118786
LOC103990174	3.51574	2.48326	0.000314039	0.0118786
LOC103979292	1.72648	3.15636	0.000314316	0.0118786
LOC103968356	2.55266	2.27215	0.00031834	0.012007
LOC103993528	1.97006	5.24717	0.00031856	0.012007
LOC103975541	-1.68523	4.31784	0.00031988	0.0120345
LOC103969972	5.46696	2.37996	0.000320138	0.0120345
LOC103968995	-2.53051	5.94989	0.000324008	0.0121415
LOC103989024	-1.12544	4.20721	0.000324236	0.0121415
LOC103974595	-2.00444	5.36168	0.00032427	0.0121415
LOC103999733	-3.49736	3.1135	0.000324939	0.0121505
LOC103983024	-2.1722	4.17715	0.000325494	0.0121552
LOC103993510	1.81948	4.25787	0.000328553	0.0122319
LOC103969283	-4.66022	3.09172	0.000329149	0.0122319
LOC103993709	-1.67084	9.91603	0.000329269	0.0122319
LOC103979929	1.66669	4.16465	0.000329274	0.0122319
LOC103997660	-2.43564	7.17326	0.00032997	0.0122417
LOC104001030	2.47237	5.22785	0.000331976	0.0123
LOC103970778	2.48368	7.51674	0.000334188	0.0123658
LOC103989150	2.43531	5.34529	0.000334992	0.0123663
LOC103989204	1.23788	5.41302	0.000335073	0.0123663
LOC103982377	3.21345	6.16444	0.000335552	0.0123678
LOC103971017	-1.43592	4.24037	0.000336296	0.0123792
LOC103995819	-1.57333	6.64701	0.000338388	0.0124194
LOC104000636	2.49314	8.64344	0.000338659	0.0124194
LOC103980786	2.68861	5.13344	0.000338703	0.0124194
LOC103981700	2.97006	5.88656	0.000340523	0.01247
LOC103998838	2.22696	3.30502	0.000341366	0.0124716
LOC103970991	2.21125	2.10076	0.000341445	0.0124716
LOC103999342	1.9171	2.67345	0.000342267	0.0124855
LOC103997006	1.57445	4.86929	0.000347601	0.0126638
LOC103988528	1.99814	6.31215	0.000349073	0.0127011
LOC103998902	-2.10341	5.7963	0.000351134	0.0127475
LOC103987530	-1.61405	2.72929	0.000351248	0.0127475
LOC103980450	-3.42098	5.34666	0.000351803	0.0127513
LOC103974128	-1.42	4.22661	0.000355476	0.0128566
LOC103971470	-1.98647	7.91867	0.000355616	0.0128566
LOC103994683	1.97465	5.84427	0.000356794	0.0128828
LOC103992216	2.10693	7.32913	0.000358159	0.0129156
LOC103992741	-1.45822	3.37672	0.000361117	0.0130057
LOC103999790	1.92133	2.65786	0.000362382	0.0130347
LOC103986497	2.33025	6.43189	0.000364925	0.0130959
LOC104000331	2.50335	6.92327	0.000365008	0.0130959
LOC103994992	1.67401	4.18897	0.000365468	0.0130959
LOC103994182	-1.30133	5.42578	0.00036773	0.0131603
LOC103975709	-2.8897	5.08422	0.00036919	0.0131959
LOC103984865	2.16924	5.50168	0.000372904	0.0133118
LOC103988323	-1.56505	3.83697	0.000374083	0.0133294
LOC103992056	1.97567	6.49291	0.000374347	0.0133294
LOC103981423	-1.51962	7.02643	0.000374808	0.0133294
LOC103973694	-2.34346	4.58025	0.00037733	0.0134023
LOC103981538	2.01566	3.98608	0.000380632	0.013488
LOC103973389	1.19878	4.0458	0.000380694	0.013488
LOC103972466	-2.26054	6.52468	0.000383669	0.0135764
LOC103998725	2.90243	5.638	0.000386568	0.013662
LOC103974300	1.7405	3.50298	0.000387291	0.0136705
LOC103982731	-2.23057	3.96119	0.000388213	0.013686
LOC103980340	1.56561	5.03123	0.000390538	0.0137508
LOC103987715	-2.22987	6.9111	0.000391824	0.013779
LOC103988111	-1.52038	5.41511	0.000393692	0.0138275
LOC103991201	1.60036	3.99811	0.000395453	0.0138722
LOC104000500	2.30098	4.89346	0.000396434	0.0138894
LOC103994095	-1.25201	8.60462	0.000397183	0.0138985
LOC103983633	-1.95065	6.59949	0.00040311	0.0140793
LOC103970289	3.43992	2.01665	0.000403343	0.0140793
LOC103973847	3.35238	1.47079	0.000407091	0.0141926
LOC103999480	-2.74011	8.96208	0.000409572	0.0142615
LOC103992856	-1.53893	5.97333	0.000412765	0.014355
LOC103971288	2.63289	2.57586	0.000413269	0.014355
LOC103979428	-1.55477	7.59966	0.000416967	0.0144658
LOC103992729	2.16113	1.69056	0.000419884	0.0145491
LOC103994455	3.09479	5.13913	0.000420435	0.0145504
LOC103977976	2.76074	2.09302	0.000421133	0.0145568
LOC103994962	1.80845	7.47022	0.000422763	0.0145954
LOC103986543	1.18338	6.3507	0.000425098	0.0146581
LOC103986671	-2.15741	5.72281	0.00042684	0.0147003
LOC103986711	-2.08256	9.89281	0.000428059	0.0147244
LOC103970436	2.64688	3.55507	0.000431073	0.0148101
LOC103975726	2.66033	4.31734	0.000432221	0.0148316
LOC103982242	-1.3308	7.38016	0.00043421	0.0148758
LOC103977863	1.97136	2.13093	0.000434559	0.0148758
LOC103978423	2.56767	4.22162	0.000436101	0.0149106
LOC103981825	-1.83315	5.8823	0.000436745	0.0149146
LOC103996007	1.97075	3.66235	0.000440218	0.0150151
LOC103995636	1.67501	5.35597	0.000440832	0.015018
LOC103990934	1.84872	4.45596	0.000443623	0.0150829
LOC103990047	2.15086	3.84034	0.000443801	0.0150829
LOC103987687	-2.24242	7.11552	0.000444507	0.0150861
LOC103979819	-2.19395	3.01938	0.000445382	0.0150861
LOC103969437	-4.64443	2.9636	0.000445492	0.0150861
LOC103996158	2.71133	4.17471	0.000454274	0.0153651
LOC103972785	2.27145	4.8043	0.000459126	0.0155107
LOC103992513	-1.62385	5.17105	0.000461771	0.0155815
LOC103971716	1.03909	4.67037	0.000465304	0.015682
LOC103995567	-1.49102	4.7372	0.000467921	0.0157515
LOC103986344	-1.72054	4.48873	0.000469866	0.0157982
LOC104000185	2.54875	3.83212	0.000470907	0.0158144
LOC103988934	1.52998	4.41604	0.00047363	0.015887
LOC103990681	-3.31998	1.94015	0.000476503	0.0159645
LOC103970422	-1.76608	5.13046	0.000479661	0.0160514
LOC103996941	1.75552	5.57583	0.000480348	0.0160554
LOC103996942	-4.53228	4.32293	0.00048275	0.0161167
LOC103999564	-2.03973	8.35966	0.000485091	0.0161758
LOC103978197	-9.06751	1.89818	0.000486791	0.0162134
LOC103997289	2.54794	2.29045	0.000488799	0.0162459
LOC103969103	2.31627	4.95237	0.000488913	0.0162459
LOC103984222	1.59552	3.15269	0.000491797	0.0163226
LOC103980817	2.17827	3.25784	0.000496583	0.0164466
LOC103970647	-1.3284	8.95153	0.000496695	0.0164466
LOC103999804	3.19519	5.23215	0.000498406	0.016484
LOC103978966	-1.40155	8.01789	0.000501352	0.0165621
LOC103988504	2.08541	9.01421	0.000503216	0.0166044
LOC103987544	-1.29604	5.18497	0.000506458	0.0166919
LOC103975910	1.95118	7.94068	0.000507319	0.0167009
LOC103975634	1.85377	7.49881	0.000508518	0.0167209
LOC103987831	-2.41249	1.74374	0.000511683	0.0168055
LOC104000808	-2.67539	3.61068	0.000513005	0.0168294
LOC103984137	-3.54413	3.05279	0.000518056	0.0169755
LOC103987658	2.16477	8.99685	0.00052017	0.017025
LOC103974223	-1.84076	5.30729	0.000522152	0.0170702
LOC103992687	-3.65698	0.520965	0.000523214	0.0170739
LOC103996029	-1.63203	3.77105	0.000523896	0.0170739
LOC103993022	-1.75273	6.48383	0.000524071	0.0170739
LOC103973020	-2.12459	2.36946	0.000527405	0.0171628
LOC103980816	2.39256	2.86705	0.000529631	0.0172017
LOC103984132	7.91008	-0.443498	0.000530598	0.0172017
LOC103979305	-1.33507	8.67623	0.0005309	0.0172017
LOC103998698	1.95305	3.46331	0.00053103	0.0172017
LOC103985839	-1.99749	6.20445	0.000534049	0.0172798
LOC103995301	-1.12087	4.69444	0.000535599	0.0173102
LOC103983014	1.90304	3.57968	0.000536409	0.0173166
LOC103997787	-1.63182	2.67855	0.000540166	0.0174162
LOC103988039	-1.2917	4.97792	0.000540724	0.0174162
LOC103973353	-7.79579	-0.824683	0.000541835	0.0174322
LOC103978033	3.32094	0.907154	0.000542668	0.0174338
LOC103990759	2.10046	7.43275	0.000543732	0.0174338
LOC103983102	-2.42289	2.82359	0.000544103	0.0174338
LOC103976410	-1.38695	2.83705	0.000544345	0.0174338
LOC103984744	2.80243	8.83755	0.000547432	0.0175129
LOC103977926	5.09623	-0.780857	0.00054836	0.0175228
LOC103992133	1.51581	4.53013	0.000549631	0.0175436
LOC103973628	2.28196	5.63473	0.000551966	0.0175681
LOC103995034	-3.79487	5.9466	0.000552567	0.0175681
LOC103986372	-1.60859	5.31623	0.000552646	0.0175681
LOC103996022	1.8984	4.75218	0.000553106	0.0175681
LOC103968354	5.86026	0.843044	0.000553497	0.0175681
LOC103977581	2.63107	4.01073	0.000555282	0.017605
LOC103979087	1.96858	3.28785	0.00056662	0.0179142
LOC103995773	1.41946	3.56861	0.000566647	0.0179142
LOC103996756	2.51445	3.92715	0.000566928	0.0179142
LOC104000310	1.74248	5.12274	0.000569021	0.0179554
LOC103985332	-1.5545	7.10882	0.000569615	0.0179554
LOC103969691	-1.6353	4.15212	0.000570134	0.0179554
LOC103985836	1.65552	5.27942	0.000571208	0.0179693
LOC103991366	-3.2709	3.82593	0.000574737	0.0180602
LOC103992151	-1.56935	4.25395	0.000580238	0.0182129
LOC103979406	1.48635	5.66157	0.000583674	0.0183005
LOC103996047	-2.23625	2.49525	0.000586101	0.0183469
LOC103994177	1.38156	5.79137	0.000587023	0.0183469
LOC103987696	1.74994	3.69201	0.000587096	0.0183469
LOC103982502	-1.13629	5.17797	0.000588786	0.0183603
LOC103970577	3.33249	2.96301	0.000589073	0.0183603
LOC103989628	1.61793	5.40103	0.000589467	0.0183603
LOC103993738	-1.53332	9.03176	0.000590323	0.0183667
LOC103992006	1.5327	5.95071	0.00059283	0.0184245
LOC103990299	-1.73155	4.95847	0.000599308	0.0186055
LOC103979999	-1.72776	4.68599	0.000601885	0.018665
LOC103976213	-1.89714	4.73065	0.000602858	0.0186748
LOC103996800	1.77247	3.56728	0.000604368	0.0186919
LOC104000030	3.64166	1.02678	0.000604846	0.0186919
LOC103987747	2.47623	4.38297	0.000605803	0.0186919
LOC103974739	-2.27676	2.96341	0.000606049	0.0186919
LOC103999026	1.62665	4.00976	0.000609257	0.0187704
LOC104000506	1.2891	4.78137	0.000611016	0.0188042
LOC103975280	-1.81006	6.05253	0.000612392	0.0188261
LOC103996204	1.78129	3.83931	0.000613817	0.0188494
LOC103995369	2.11766	6.65006	0.000616621	0.018915
LOC103970142	2.85008	5.20262	0.000617683	0.0189271
LOC103982970	1.8384	5.35068	0.000618904	0.0189441
LOC103984237	3.41793	6.28264	0.000626249	0.0191482
LOC103976209	-2.9096	1.45938	0.000627716	0.0191724
LOC103978880	1.81284	5.10334	0.000630485	0.0192362
LOC103985144	2.50455	2.47836	0.000636166	0.0193887
LOC103991283	-1.41127	6.91398	0.000637242	0.0194006
LOC103973140	1.67665	4.68815	0.000639058	0.019435
LOC103986016	-1.63526	4.3017	0.000640811	0.0194622
LOC103989184	2.02578	2.22311	0.000641324	0.0194622
LOC103997140	2.2601	8.06698	0.00064609	0.0195859
LOC103987243	-1.74444	10.2843	0.00064736	0.0195915
LOC103987057	1.94266	5.6356	0.000647658	0.0195915
LOC103983152	2.52549	5.03981	0.000650767	0.0196482
LOC103983175	-3.51758	-0.0613736	0.000650919	0.0196482
LOC103992248	-3.21294	1.68446	0.000653215	0.019678
LOC103994707	-3.08991	1.79449	0.000653294	0.019678
LOC103977071	-2.12843	2.98293	0.000654058	0.0196801
LOC103983655	2.71761	1.756	0.000660224	0.0198445
LOC103977159	-5.91437	-0.362424	0.000662318	0.0198864
LOC103987625	0.986121	5.90043	0.000664491	0.0199305
LOC103983870	-1.61079	4.52133	0.000668985	0.0200441
LOC103976878	-2.41097	7.04678	0.000670927	0.020081
LOC103990137	2.22246	4.50425	0.000675109	0.0201849
LOC103975739	2.68272	5.19848	0.00067801	0.0202503
LOC103988648	3.06713	5.57616	0.000684033	0.0204087
LOC103997533	1.26599	4.40214	0.000686726	0.0204502
LOC103992432	-2.51449	3.84654	0.000686867	0.0204502
LOC103995242	-2.41419	5.16956	0.000687995	0.020462
LOC103989673	-1.74671	6.43025	0.000689106	0.020462
LOC103986011	-1.21849	5.29755	0.000689431	0.020462
LOC103983782	2.24622	6.18425	0.000692739	0.0205387
LOC103997306	-1.56443	4.84164	0.000694772	0.0205774
LOC103995694	1.58617	3.28793	0.000696067	0.0205943
LOC103986852	-1.65554	2.46853	0.000698697	0.0206505
LOC103994563	2.1181	3.72554	0.000702451	0.0207399
LOC103974839	-1.28155	3.68475	0.000706839	0.0208295
LOC103980281	2.03047	1.886	0.000707311	0.0208295
LOC103991167	-3.8538	-0.665001	0.000707691	0.0208295
LOC103994179	-2.11454	3.96665	0.000708528	0.0208325
LOC103992635	-2.00018	8.92814	0.000710194	0.0208598
LOC103978340	-2.16818	3.60973	0.000720684	0.0211288
LOC103975507	2.29499	9.29806	0.000720841	0.0211288
LOC103969348	2.02384	2.75835	0.000723613	0.0211881
LOC103993112	2.46651	5.10853	0.000726981	0.0212648
LOC103969045	-2.80731	4.87977	0.00073081	0.0213547
LOC103976169	-2.2188	6.16707	0.000738376	0.0215536
LOC103992607	2.63621	8.18436	0.000741673	0.0216276
LOC103972271	2.14007	1.4722	0.000748392	0.0218011
LOC103989093	-1.63749	7.05002	0.000750521	0.0218406
LOC103972742	3.28794	1.78927	0.000751855	0.021857
LOC103981697	1.7276	4.09278	0.000756284	0.0219632
LOC103969451	3.08469	3.93419	0.000758766	0.0220127
LOC103999951	4.105	1.21105	0.0007614	0.0220666
LOC103978305	1.80677	3.69226	0.000762721	0.0220823
LOC103980586	1.53812	3.99877	0.000765205	0.0221316
LOC103979672	-2.10458	2.46236	0.000767729	0.022182
LOC103983369	3.31537	4.9409	0.000769023	0.0221967
LOC103982312	3.15419	3.16097	0.000771298	0.0222135
LOC103985441	-2.26444	4.77655	0.000771623	0.0222135
LOC103983818	2.02325	4.68619	0.000772037	0.0222135
LOC104000251	-1.50045	6.20792	0.000772738	0.0222135
LOC103985629	-1.35717	10.0022	0.000774245	0.0222343
LOC103971203	4.65577	2.68339	0.00077601	0.0222624
LOC104000278	1.4597	3.96812	0.000778744	0.0223182
LOC103974205	4.90112	6.52781	0.000782121	0.0223923
LOC103969164	-1.54208	5.01959	0.000783024	0.0223956
LOC103991318	1.08221	5.98835	0.000784841	0.0224076
LOC103998403	-1.49232	5.26382	0.000785024	0.0224076
LOC103993930	-2.21128	2.87573	0.000790334	0.0225364
LOC103976967	2.22589	8.73455	0.000791788	0.0225552
LOC103985494	-1.38377	4.94707	0.000796299	0.0226609
LOC103972710	-2.4171	3.50997	0.000798998	0.022715
LOC103979451	-1.18368	5.85972	0.00080173	0.0227698
LOC103991371	2.1502	6.57641	0.000805492	0.0228426
LOC103981558	1.66732	4.30026	0.000805907	0.0228426
LOC103980769	1.2517	4.34549	0.000808079	0.0228813
LOC103992636	1.81028	3.75875	0.000810434	0.0229251
LOC103989306	1.86447	7.97097	0.000816518	0.0230742
LOC103998793	1.8404	5.17484	0.000824699	0.0232821
LOC103979681	2.41454	4.72678	0.000825704	0.0232873
LOC103996822	3.21838	2.65743	0.000829845	0.0233794
LOC103995732	2.20824	1.70444	0.000830617	0.0233794
LOC103977767	-2.01683	2.64281	0.000832529	0.0234099
LOC103978974	1.38749	5.24146	0.000836127	0.0234878
LOC103972219	-1.37903	5.51279	0.000837944	0.0235155
LOC103982231	2.22631	3.92855	0.00084013	0.0235413
LOC103995179	2.30353	3.16929	0.000840978	0.0235413
LOC103987320	-2.93116	6.84299	0.00084151	0.0235413
LOC103989585	2.95498	5.92422	0.000842183	0.0235413
LOC103971996	-3.86432	1.11565	0.000843886	0.0235656
LOC103975678	1.88487	6.07903	0.0008483	0.0236656
LOC103996699	-1.92845	8.0244	0.000850052	0.0236755
LOC103997951	-1.99132	5.37383	0.000850326	0.0236755
LOC103998353	-2.38235	4.12907	0.000851368	0.0236812
LOC103991920	1.25089	5.90429	0.000854687	0.0237503
LOC103973925	-1.21668	5.21071	0.000857284	0.0237991
LOC103987950	-1.40626	5.79645	0.000863681	0.0239532
LOC103978238	2.17838	3.833	0.000868663	0.0240507
LOC103995167	1.61668	3.69838	0.000868893	0.0240507
LOC103993110	-1.26317	9.39898	0.00087294	0.0241391
LOC103977727	2.16114	5.11664	0.000876189	0.024186
LOC103987156	-1.05978	6.08093	0.000876342	0.024186
LOC103970206	1.83525	3.91248	0.000880193	0.0242687
LOC103984224	1.82455	6.22894	0.000881219	0.0242734
LOC103993813	-1.51419	5.96383	0.000886317	0.0243901
LOC103995431	1.77842	6.22809	0.000890232	0.024474
LOC103976721	-1.23219	4.21716	0.000892243	0.0244854
LOC103973536	3.23753	6.67713	0.000892375	0.0244854
LOC103998047	2.28553	6.64086	0.000895272	0.0245122
LOC103991172	-1.7552	5.03306	0.000895349	0.0245122
LOC103977975	2.58155	4.51871	0.000895943	0.0245122
LOC103987038	5.52154	1.05961	0.000899941	0.0245807
LOC103969596	-1.72431	3.02896	0.000900182	0.0245807
LOC103970766	-2.19667	6.84931	0.000902043	0.0246078
LOC103987379	-2.90943	1.21683	0.000906796	0.0247137
LOC103986282	1.92188	3.65526	0.000907915	0.0247204
LOC103973344	1.12328	4.24851	0.00091297	0.0248342
LOC103974337	-1.37792	4.3157	0.000916393	0.0249034
LOC103982057	1.84015	3.96462	0.000918134	0.0249063
LOC104000010	1.67712	4.90671	0.000918258	0.0249063
LOC103974520	-2.30049	4.36246	0.000922596	0.0250001
LOC103979386	-1.27852	5.58813	0.000928679	0.0251408
LOC103982735	1.567	4.88685	0.000930787	0.0251588
LOC103977522	1.18266	5.23711	0.000931878	0.0251588
LOC103979173	1.55452	4.68492	0.000932005	0.0251588
LOC103975374	3.03051	2.2212	0.000937582	0.0252727
LOC103987690	1.23712	4.00984	0.000938007	0.0252727
LOC103974426	1.31016	3.85304	0.000940482	0.0253153
LOC103996370	3.21362	5.21008	0.000941849	0.0253281
LOC103990265	-6.35388	-0.148554	0.000947663	0.0254603
LOC103990546	-2.2221	4.12873	0.000949895	0.025496
LOC103979760	1.4386	3.59432	0.000951624	0.0255183
LOC103977104	1.91915	3.09856	0.000956631	0.0256283
LOC103996385	-3.43905	1.12085	0.00095825	0.0256474
LOC103983528	2.4582	4.90078	0.000960012	0.0256704
LOC103973235	-3.63815	0.0654493	0.000968323	0.0258297
LOC103985460	1.4449	3.5153	0.000968539	0.0258297
LOC103972462	-1.01144	6.31727	0.000969449	0.0258297
LOC103975686	-2.14624	6.14241	0.000969616	0.0258297
LOC103989656	2.05419	8.12541	0.000971968	0.025868
LOC103998775	1.5837	5.79337	0.000973448	0.0258831
LOC103969708	4.47381	1.16795	0.000977215	0.0259589
LOC103984284	-5.73971	-0.137398	0.000981441	0.0260424
LOC103968979	1.76615	2.84023	0.000982581	0.0260424
LOC103988022	-1.82641	5.58296	0.000983112	0.0260424
LOC103988273	-2.82718	3.82664	0.000994429	0.0263175
LOC103982148	1.38111	3.46908	0.00100051	0.0264539
LOC103986090	1.15648	4.78739	0.00100344	0.0265065
LOC103995121	1.24919	6.35538	0.00100945	0.0266404
LOC103999299	1.13939	5.24573	0.00101442	0.0267467
LOC103983434	2.92032	1.95377	0.00101702	0.0267905
LOC103997634	-2.50694	5.81925	0.00102623	0.0270077
LOC103974724	-4.57341	0.747973	0.0010313	0.0271161
LOC103998448	2.10188	5.76471	0.00103734	0.0272334
LOC103983584	-3.95579	-0.538413	0.00103834	0.0272334
LOC103979288	-1.45256	3.63401	0.00103948	0.0272334
LOC103979504	-2.9212	4.25886	0.0010396	0.0272334
LOC103988328	-1.74946	3.59758	0.00104508	0.0273515
LOC103983933	-1.62188	4.40872	0.00105707	0.0276398
LOC103982122	1.75594	3.83387	0.00106347	0.0277816
LOC103998554	1.54571	5.42709	0.0010673	0.0278559
LOC103992923	1.07447	4.78994	0.00106998	0.0278811
LOC103976102	2.7077	2.75502	0.00107264	0.0278811
LOC103988210	-2.6448	1.80385	0.00107295	0.0278811
LOC103970168	-1.27454	4.71632	0.00107299	0.0278811
LOC103971495	-2.03288	4.45096	0.00107318	0.0278811
LOC103983934	-3.29337	1.1263	0.00107553	0.0279052
LOC103992495	1.35075	5.83464	0.00107608	0.0279052
LOC103990523	3.1909	2.07663	0.00108361	0.0280748
LOC104000914	1.23778	3.90346	0.00109443	0.0283067
LOC103982461	3.73676	4.7528	0.00109456	0.0283067
LOC104000843	-3.05908	1.65858	0.00109676	0.0283378
LOC103978288	1.11967	5.16921	0.00110084	0.0284173
LOC103984696	1.61333	7.26855	0.00110591	0.0285222
LOC103988063	1.90717	3.26498	0.00110768	0.0285419
LOC103970084	-5.60083	-1.2329	0.00110981	0.0285709
LOC103995950	1.48376	4.01554	0.00111134	0.0285843
LOC104000196	2.08228	6.91704	0.00111559	0.0286472
LOC103986693	2.47544	3.60087	0.00111581	0.0286472
LOC103975310	1.1783	6.88618	0.00111708	0.0286538
LOC103974977	1.40084	4.42907	0.00112195	0.0287484
LOC103984056	2.4195	6.45117	0.00112279	0.0287484
LOC103994439	-2.70727	7.32932	0.00112639	0.0288144
LOC103983658	-2.12387	5.17939	0.00112817	0.028834
LOC103980297	-1.56735	5.12623	0.00113154	0.0288941
LOC103971855	1.83213	3.01108	0.00113464	0.0289471
LOC103989203	2.04825	3.69398	0.00113836	0.0290159
LOC104000009	3.01255	1.02626	0.00114055	0.0290246
LOC103995965	2.06652	5.10413	0.00114075	0.0290246
LOC103990294	-2.04546	6.22011	0.00114744	0.0291687
LOC103978748	2.47063	1.52702	0.00114939	0.0291696
LOC103982307	1.8233	8.28071	0.00114954	0.0291696
LOC103988743	-3.33419	3.55178	0.00115348	0.0292435
LOC103981287	-2.095	5.76817	0.00115902	0.0293546
LOC103968551	-1.30371	4.54952	0.00116027	0.0293546
LOC103999673	-1.51132	4.83151	0.00116097	0.0293546
LOC103974515	-1.58763	4.47126	0.0011661	0.0294423
LOC104000855	-1.38734	6.48957	0.00116651	0.0294423
LOC103992149	1.90578	3.93916	0.00116986	0.0294443
LOC103987167	-2.18896	4.41332	0.00116992	0.0294443
LOC103969405	1.33817	5.47563	0.00117055	0.0294443
LOC104000712	-1.87335	4.43384	0.00117117	0.0294443
LOC103983075	1.97068	7.5551	0.00117179	0.0294443
LOC103979383	-1.63064	3.36867	0.00117422	0.0294793
LOC103987839	1.49148	4.28032	0.00117798	0.0295308
LOC103983696	-2.72083	3.11199	0.00117836	0.0295308
LOC103995404	-1.36356	7.9946	0.00118033	0.0295541
LOC103972349	2.56699	2.42955	0.00118208	0.0295718
LOC103977631	2.33506	2.68465	0.00118395	0.0295924
LOC103978170	-1.49419	5.6939	0.00118682	0.0296382
LOC103973273	2.36845	1.12755	0.00118859	0.029647
LOC103972191	1.42107	3.37771	0.00118988	0.029647
LOC103997827	1.683	2.7425	0.00119052	0.029647
LOC103994519	-4.38784	1.91398	0.00119136	0.029647
LOC103976919	-2.21329	2.19835	0.00120462	0.0299253
LOC103982213	-1.62971	2.67331	0.00120534	0.0299253
LOC103994005	1.38985	3.5062	0.00120571	0.0299253
LOC103997308	-1.26656	4.31112	0.0012073	0.0299385
LOC103977369	1.63245	5.01007	0.00121001	0.0299795
LOC103987385	-1.36417	5.83798	0.00121192	0.0299871
LOC103987051	1.56939	2.9018	0.00121243	0.0299871
LOC103980510	-7.54942	0.125	0.00121366	0.0299913
LOC103979871	1.78933	2.26931	0.00121513	0.0300014
LOC103972323	1.33702	4.28504	0.00121748	0.0300334
LOC103989397	1.68162	3.82831	0.0012212	0.0300609
LOC103984247	3.12147	7.07821	0.00122221	0.0300609
LOC103982042	1.54488	3.07985	0.00122261	0.0300609
LOC104000733	-2.0347	3.36211	0.00122284	0.0300609
LOC103974773	-3.49399	5.19926	0.0012286	0.0301615
LOC103978602	1.5366	6.54628	0.00122906	0.0301615
LOC103993936	1.58696	4.22017	0.00123233	0.0301902
LOC103984772	1.97634	3.538	0.00123283	0.0301902
LOC103981407	1.5034	6.15724	0.00123423	0.0301902
LOC103985557	1.51882	3.57582	0.00123588	0.0301902
LOC103974763	1.3986	7.0613	0.00123649	0.0301902
LOC103999556	-2.97945	1.02801	0.00123662	0.0301902
LOC104000652	2.30283	2.29823	0.00124238	0.0303046
LOC103984097	2.12126	4.27696	0.00124422	0.0303234
LOC103995294	1.457	6.80365	0.00125427	0.0305422
LOC103987814	-2.05474	8.2513	0.0012557	0.0305507
LOC103991428	2.05067	5.61467	0.00125939	0.0306142
LOC103972912	1.62438	2.64331	0.00126078	0.0306218
LOC103994555	2.45691	2.58282	0.00127189	0.0308651
LOC103989568	-1.79536	3.12377	0.00127358	0.0308673
LOC103983698	-2.31798	7.28163	0.00127501	0.0308673
LOC104000592	7.97393	-0.789236	0.00127525	0.0308673
LOC103991747	6.55974	-0.905688	0.00127644	0.0308699
LOC103968557	-1.40012	5.73525	0.001279	0.0309054
LOC103985807	1.28427	5.68233	0.00128556	0.0310315
LOC103973876	1.46778	3.89626	0.00128641	0.0310315
LOC103978884	3.19177	3.40378	0.00128918	0.0310619
LOC103992394	1.39525	4.92221	0.00128986	0.0310619
LOC103998618	1.16419	5.42331	0.00129966	0.0312712
LOC103983011	1.13089	6.06028	0.00131141	0.0315064
LOC103992910	1.55345	9.27629	0.00131204	0.0315064
LOC103972501	-1.71551	5.20588	0.00131277	0.0315064
LOC103988772	1.79269	3.83817	0.00132183	0.0316815
LOC103996172	1.52248	4.35786	0.0013223	0.0316815
LOC103992902	2.82518	1.88279	0.0013385	0.0320427
LOC103991729	0.935592	6.19949	0.00133996	0.0320505
LOC103972151	-1.36433	7.25216	0.00134424	0.0321153
LOC103998908	-1.14117	4.93948	0.00134494	0.0321153
LOC103970662	-1.24229	4.92631	0.00134774	0.0321551
LOC103993584	1.32754	4.53728	0.00135328	0.0322603
LOC103970510	1.71516	4.2762	0.00135604	0.0322899
LOC103993812	-1.81544	7.2193	0.00135681	0.0322899
LOC103988136	-1.25352	7.87349	0.00135865	0.0323066
LOC103981974	-1.42709	3.85655	0.00136048	0.0323232
LOC103981910	-1.94662	6.92095	0.00136262	0.0323469
LOC103977715	-2.19753	4.12741	0.00136515	0.0323798
LOC103994776	2.26109	3.44987	0.00136712	0.0323994
LOC103989063	2.4337	6.44934	0.00137123	0.0324696
LOC103995951	1.96267	4.37833	0.00137592	0.0325535
LOC103980853	1.20558	5.21763	0.00137741	0.0325615
LOC103987455	-1.80803	5.75481	0.00139269	0.0328954
LOC103982238	1.06521	3.97368	0.00139731	0.0329259
LOC103981456	-1.31384	2.83822	0.00139748	0.0329259
LOC103984555	2.00404	5.28997	0.00139876	0.0329259
LOC103990754	-2.18099	6.10382	0.00139904	0.0329259
LOC103977097	1.34485	4.53015	0.00139979	0.0329259
LOC103987962	2.773	3.29934	0.00140936	0.0331235
LOC103989352	2.7963	2.96736	0.00141327	0.033188
LOC103998078	2.71699	2.78408	0.00141859	0.0332851
LOC103997649	0.956199	5.03292	0.00142073	0.0333079
LOC103993267	-2.5045	0.732061	0.00142755	0.0334401
LOC103970366	1.84156	2.81438	0.00143342	0.0335498
LOC103980086	1.90244	2.0169	0.00143766	0.0336214
LOC103971030	1.5287	6.5748	0.00144114	0.0336606
LOC103979920	2.37268	7.74058	0.00144172	0.0336606
LOC103977149	2.88464	2.26084	0.00144423	0.0336853
LOC103971677	2.14244	3.38676	0.00144515	0.0336853
LOC103971387	2.12564	8.47693	0.00144716	0.0337045
LOC103983661	2.32569	6.29401	0.00144953	0.0337275
LOC103984594	1.44183	4.25943	0.00145053	0.0337275
LOC103980856	2.17298	4.3217	0.00145307	0.033759
LOC103993804	-7.17448	-0.225267	0.0014575	0.033834
LOC103974539	-1.25666	3.72855	0.00146109	0.0338896
LOC103986709	1.20765	6.61729	0.00146748	0.0340101
LOC103974861	-2.19933	1.53738	0.00146908	0.0340192
LOC103971235	1.6136	4.17868	0.00147603	0.0341272
LOC103996637	1.28295	4.75181	0.00147615	0.0341272
LOC103975501	1.43864	3.70086	0.00147895	0.0341642
LOC103996275	2.89465	2.41666	0.00148428	0.0342593
LOC103976058	1.29605	4.91577	0.00148825	0.0342955
LOC103994551	-1.93149	8.05611	0.00148827	0.0342955
LOC103985840	-1.57676	4.86805	0.00149397	0.0343965
LOC103969464	-1.81553	4.44784	0.00149508	0.0343965
LOC103971965	-1.3094	5.52469	0.00149648	0.0344008
LOC103999618	1.68419	8.18126	0.0015022	0.0345042
LOC103974450	1.47789	5.21748	0.00151855	0.0348517
LOC104000237	-1.88096	5.3516	0.00152282	0.0349213
LOC103975434	2.86574	4.59412	0.00152451	0.0349319
LOC103998043	-1.4769	8.07749	0.00152989	0.0350267
LOC103977055	-3.05037	3.39162	0.00153394	0.0350772
LOC103992768	-2.01927	1.65665	0.00153457	0.0350772
LOC103993826	1.49387	7.35797	0.00153688	0.0351019
LOC103998424	1.73074	2.38085	0.00153866	0.0351143
LOC103970141	2.93662	4.16164	0.00154403	0.0351816
LOC103996129	-3.39733	4.5404	0.00154452	0.0351816
LOC103998764	-1.41806	6.58144	0.00154534	0.0351816
LOC103972257	1.31678	2.93594	0.00154931	0.0352404
LOC103978157	1.35481	4.33517	0.00155041	0.0352404
LOC103990050	1.25649	4.54101	0.00156292	0.0354275
LOC103974134	1.26605	4.54197	0.00156437	0.0354275
LOC103983119	-1.35354	5.96461	0.00156576	0.0354275
LOC104000472	-1.10268	4.09161	0.0015666	0.0354275
LOC103995405	-1.46304	6.74949	0.00156726	0.0354275
LOC103982618	1.20734	4.75215	0.00156741	0.0354275
LOC103987906	1.48924	4.51436	0.00156776	0.0354275
LOC103997948	1.46684	6.49512	0.00156864	0.0354275
LOC103971608	-1.99523	4.75922	0.00157285	0.0354942
LOC103995598	-2.71172	8.4366	0.0015793	0.0356114
LOC103968856	-1.01242	8.47191	0.00158162	0.0356356
LOC103989491	-1.32822	4.14453	0.00158781	0.0357102
LOC103971534	1.72938	3.662	0.00158789	0.0357102
LOC103993362	-2.18305	6.67823	0.00158872	0.0357102
LOC103990389	2.1239	4.61983	0.00159109	0.0357353
LOC103990532	1.0601	4.17675	0.00159361	0.0357634
LOC103983225	1.70091	3.39655	0.00160001	0.0358786
LOC103998932	-1.02502	5.0205	0.00160159	0.0358856
LOC103992175	-1.05928	3.83767	0.00160505	0.0359348
LOC103992437	1.52052	3.99668	0.00161077	0.0360344
LOC103986975	-1.34645	6.42841	0.00161736	0.0361533
LOC103992929	-1.7408	9.11842	0.00162416	0.0362072
LOC103975976	1.81354	4.53622	0.00162557	0.0362072
LOC103978156	3.32932	7.83696	0.0016269	0.0362072
LOC103983951	0.893015	5.01477	0.00162707	0.0362072
LOC104000137	2.31627	7.30459	0.00162729	0.0362072
LOC103971831	-1.99723	2.36791	0.00162761	0.0362072
LOC103993470	-2.0755	7.90367	0.00162886	0.0362072
LOC103970659	-2.10703	3.84193	0.00162999	0.0362072
LOC103976941	-1.63582	5.36824	0.00163178	0.0362187
LOC103993252	1.79388	5.89284	0.00163322	0.0362221
LOC103974217	2.73453	3.49094	0.00164	0.0363441
LOC103968991	-1.3979	3.51214	0.00164219	0.0363548
LOC103990209	-1.50445	5.89431	0.00164304	0.0363548
LOC103974820	-2.13928	1.73625	0.00164878	0.0364339
LOC104000604	1.92165	8.42309	0.00164919	0.0364339
LOC103972730	-2.09677	3.71884	0.00166957	0.0368442
LOC103990635	1.97817	6.38103	0.00167096	0.0368442
LOC103994594	-1.31598	4.2113	0.00167166	0.0368442
LOC103970476	-1.665	5.85176	0.00167546	0.0368898
LOC103979572	-2.17626	3.2616	0.00167687	0.0368898
LOC103970473	-1.57865	7.76637	0.00167764	0.0368898
LOC103982333	-1.59941	3.12689	0.00167926	0.0368969
LOC103999709	2.03202	4.58365	0.00168219	0.0369325
LOC103983720	2.67735	2.5643	0.00168924	0.0370582
LOC103976749	-1.3742	4.69815	0.00169052	0.0370582
LOC103980616	1.61246	5.48832	0.00169559	0.0371405
LOC103968740	1.68126	3.37355	0.00169839	0.0371731
LOC103995321	3.06062	2.09421	0.00170796	0.0373537
LOC103988950	1.62307	7.08063	0.00171116	0.0373948
LOC103989297	1.62035	4.72974	0.00171362	0.0374198
LOC103997382	-1.18565	4.45797	0.00172404	0.0375717
LOC103986552	1.76517	5.1934	0.00172471	0.0375717
LOC103972282	1.54226	8.76365	0.0017252	0.0375717
LOC104000484	0.982512	7.25834	0.00172633	0.0375717
LOC103999597	-1.35181	4.77386	0.00172812	0.0375717
LOC103996593	-1.67316	4.50748	0.00172853	0.0375717
LOC104000324	1.5601	3.77398	0.00173109	0.0375985
LOC104000104	2.34898	4.41186	0.00173539	0.0376608
LOC103987867	-2.31813	4.51142	0.00173714	0.0376608
LOC103975542	-1.07359	6.5389	0.00173794	0.0376608
LOC103997127	1.88443	10.4803	0.00174124	0.0376795
LOC103974388	2.25447	2.94292	0.00174147	0.0376795
LOC103971767	1.33926	5.05853	0.00175085	0.0378536
LOC103986872	-1.48181	2.88087	0.00175953	0.0380123
LOC103977279	1.32528	4.14018	0.00176099	0.0380148
LOC103985693	3.33754	2.89084	0.00176301	0.0380295
LOC103980437	1.93875	5.27983	0.00176627	0.0380708
LOC103975446	1.49815	4.64251	0.00176824	0.0380843
LOC103991367	2.4391	3.3749	0.00178311	0.0383754
LOC103977073	2.03784	8.46432	0.00178705	0.0384312
LOC103989618	-2.00544	5.63724	0.00178899	0.0384435
LOC103991148	-1.4673	5.56912	0.00179295	0.0384996
LOC103983210	-1.69918	5.16303	0.00179699	0.0385571
LOC103969856	3.79691	1.90284	0.00179856	0.0385616
LOC103987067	1.4371	4.86305	0.00181376	0.0388581
LOC103987907	1.76191	4.02692	0.0018167	0.0388916
LOC103984331	-2.8161	2.23564	0.00182627	0.0390637
LOC103999840	1.73237	2.7165	0.00182749	0.0390637
LOC103987535	1.54735	3.98726	0.00182906	0.0390677
LOC103984228	2.03132	4.88954	0.0018351	0.0391673
LOC103982988	-1.79671	3.17407	0.00183751	0.0391788
LOC103997378	0.992889	5.01868	0.00183841	0.0391788
LOC103977252	1.13456	4.25715	0.00184756	0.0393311
LOC104000699	1.49977	3.87588	0.00184833	0.0393311
LOC103972399	-1.07627	5.72732	0.00184983	0.0393335
LOC103973045	1.9463	1.35654	0.00185208	0.0393519
LOC103982076	-1.9717	4.07347	0.00185472	0.0393784
LOC103996594	-1.08705	4.44516	0.00185682	0.0393936
LOC103990539	1.07525	5.3039	0.00185916	0.0394136
LOC103993495	1.18735	4.1837	0.00186326	0.0394711
LOC103991458	3.84825	1.29836	0.00186605	0.0395006
LOC103972578	1.96369	3.24062	0.00186876	0.0395284
LOC103984675	-3.4433	1.74257	0.00187315	0.0395919
LOC103971205	-1.38751	3.69665	0.00187751	0.0396543
LOC103978407	-1.41683	8.49686	0.00188718	0.0398231
LOC103986747	-1.23263	4.36992	0.00188831	0.0398231
LOC103998630	1.64166	8.95689	0.00189147	0.0398602
LOC103989579	2.31846	8.0628	0.00189844	0.0399772
LOC103988718	1.37721	4.04409	0.00190585	0.0400647
LOC103981155	1.21301	6.57135	0.00190728	0.0400647
LOC103991206	1.32357	3.93096	0.00190824	0.0400647
LOC103999409	-1.85542	3.71338	0.00190825	0.0400647
LOC103981986	-5.97853	0.13185	0.00190982	0.040068
LOC103995749	-1.63808	1.95833	0.00191133	0.0400701
LOC103997785	-6.82029	-0.439022	0.00192063	0.0401867
LOC103970129	-2.13425	1.57777	0.00192107	0.0401867
LOC103978249	2.04347	7.22569	0.00192115	0.0401867
LOC103997675	3.14553	4.94944	0.00192411	0.040219
LOC103981720	2.67023	5.24526	0.00193093	0.0403304
LOC103969610	-1.45352	5.67952	0.00193229	0.0403304
LOC104000370	-1.97931	4.75417	0.00194663	0.0405982
LOC103997871	-3.53315	2.61207	0.00194887	0.0405982
LOC103992510	1.49089	4.63858	0.00194941	0.0405982
LOC103968950	2.13562	2.73524	0.00195298	0.0406427
LOC103986374	-1.20097	7.54092	0.00195647	0.0406855
LOC103995597	-2.50259	2.31257	0.00195794	0.0406861
LOC103969357	3.7257	1.44524	0.00195948	0.0406883
LOC103998513	-1.27549	4.54043	0.00196313	0.0407343
LOC103993711	-1.40583	5.23222	0.00196765	0.0407982
LOC103968371	-2.52682	4.55349	0.0019716	0.0408501
LOC103980752	0.989574	6.1927	0.00197391	0.0408681
LOC103995879	-1.31265	6.2329	0.00197564	0.040874
LOC103997467	1.23895	7.33293	0.0019822	0.04098
LOC103997866	-1.43242	3.47727	0.00198576	0.0409961
LOC103986889	1.8218	4.64012	0.00198603	0.0409961
LOC103972263	2.47286	1.78755	0.00198732	0.0409961
LOC103992933	-3.87018	2.20078	0.00199407	0.0411055
LOC103977376	-2.01039	5.70682	0.00199914	0.04118
LOC103968790	-2.32798	5.41899	0.0020025	0.0412193
LOC103986009	-1.02105	4.15842	0.00200685	0.0412281
LOC103990354	1.85142	2.88617	0.00200702	0.0412281
LOC103974511	-1.0927	8.43001	0.00200738	0.0412281
LOC103978816	2.59492	3.43427	0.00200875	0.0412281
LOC104000340	1.95929	3.78458	0.00201243	0.0412604
LOC103978650	2.17978	4.92792	0.00201324	0.0412604
LOC103985635	-1.19659	5.30658	0.00201735	0.0413149
LOC103980240	-1.10634	5.72195	0.0020216	0.0413721
LOC103983686	1.97275	3.65722	0.00202699	0.0414523
LOC103983932	-1.31938	8.35279	0.00203405	0.0415667
LOC103993689	-1.21477	6.04817	0.00203584	0.0415734
LOC103998884	2.02335	2.49048	0.00203824	0.0415924
LOC103969161	-7.17655	0.235346	0.00204573	0.0417009
LOC103985851	-1.42822	9.54644	0.0020465	0.0417009
LOC103987871	-1.86651	2.25118	0.00205127	0.041768
LOC103989748	1.43219	3.83927	0.00205339	0.0417813
LOC103985540	1.94859	3.84999	0.00205569	0.041798
LOC103992619	-1.52607	6.95984	0.00205831	0.0418213
LOC103970759	-1.12587	4.52219	0.00206208	0.0418679
LOC103989448	-1.68737	4.16804	0.00207835	0.0421681
LOC103984862	1.4795	3.06035	0.0020805	0.0421815
LOC103980093	1.93352	3.4281	0.00208301	0.0422021
LOC103980648	1.8304	5.36031	0.00209692	0.0424239
LOC103993193	-2.23123	4.93538	0.00209695	0.0424239
LOC103994605	1.43024	4.91974	0.00210006	0.0424566
LOC103990752	1.23509	5.38468	0.00210395	0.0425049
LOC103972035	2.0365	3.42264	0.00211134	0.0425744
LOC103982581	-2.39747	2.17824	0.00211161	0.0425744
LOC103975581	1.49335	7.14992	0.0021119	0.0425744
LOC103997972	-1.83751	3.44491	0.00212074	0.0427223
LOC103991322	-1.18355	6.236	0.0021246	0.0427697
LOC103994329	1.57073	2.63762	0.00212944	0.0428121
LOC103991904	1.47262	5.20106	0.00213034	0.0428121
LOC103999482	-1.31487	8.77706	0.00213124	0.0428121
LOC103974037	1.66429	6.65498	0.00213489	0.042832
LOC103987869	-1.26939	5.35325	0.00213525	0.042832
LOC103983507	2.13079	6.27916	0.00214643	0.0430002
LOC103968732	1.46077	4.97054	0.00214667	0.0430002
LOC104000488	2.15148	1.73811	0.00214896	0.0430156
LOC103975731	-1.4656	5.72293	0.00216102	0.0432265
LOC103977002	1.4408	4.21252	0.00217701	0.0435157
LOC103983547	1.2161	4.33693	0.00218104	0.0435366
LOC103973584	-1.03839	5.38379	0.00218151	0.0435366
LOC103983286	-1.98132	4.16535	0.00218482	0.0435366
LOC103971789	-2.07345	2.28395	0.00218615	0.0435366
LOC104000979	-2.42212	1.19357	0.0021867	0.0435366
LOC103998095	1.26183	6.24659	0.00218728	0.0435366
LOC103968974	2.38488	6.83012	0.0021918	0.0435424
LOC103991655	1.3498	3.95474	0.00219216	0.0435424
LOC103979879	1.57764	3.32532	0.00219359	0.0435424
LOC103990379	1.57806	4.25809	0.00219371	0.0435424
LOC103993089	2.82058	5.37201	0.00220216	0.0436794
LOC103996981	2.38421	5.82805	0.0022071	0.0437447
LOC103993343	-1.35063	5.72626	0.00220985	0.0437447
LOC103995611	1.3944	5.88433	0.00221008	0.0437447
LOC103986720	-1.39155	5.38309	0.0022173	0.043857
LOC103973632	1.3205	3.55882	0.00221959	0.0438718
LOC103992763	-1.5586	5.23654	0.00222191	0.043887
LOC103993208	2.20807	5.3413	0.0022298	0.0440121
LOC103978161	-1.74081	7.02277	0.00224191	0.0441939
LOC103995303	3.93028	2.54249	0.00224212	0.0441939
LOC103984183	-1.96805	4.37485	0.00224946	0.0443075
LOC103969556	2.43922	1.70475	0.00225254	0.0443375
LOC103985487	1.07048	4.34497	0.00225575	0.0443698
LOC103993845	2.46755	3.00688	0.002264	0.0444608
LOC103998642	2.60712	2.87504	0.00226471	0.0444608
LOC103980597	-1.34054	3.8384	0.00226508	0.0444608
LOC103992835	-1.53488	5.79946	0.00227599	0.044608
LOC103996617	-1.28965	4.44811	0.002276	0.044608
LOC103991704	1.07165	5.91162	0.0022773	0.044608
LOC103971212	2.20425	3.01504	0.00228877	0.0448017
LOC103998784	-1.41472	6.67734	0.00230265	0.0450423
LOC103976969	2.10591	9.99171	0.0023122	0.0451979
LOC103990543	-1.52694	6.15949	0.00232237	0.0453654
LOC103998856	1.36928	5.60662	0.00232756	0.0454355
LOC103991297	-1.0349	5.31484	0.00233183	0.0454808
LOC103984799	3.91399	0.432401	0.00233309	0.0454808
LOC103998066	-1.15396	6.09173	0.00233553	0.0454971
LOC103998985	-4.95133	2.9179	0.00233961	0.0455452
LOC103988212	2.35174	4.3721	0.00234242	0.0455554
LOC103999070	3.24555	2.30632	0.00234335	0.0455554
LOC103970583	-1.20354	4.52923	0.0023454	0.045564
LOC103983052	-1.22275	7.43649	0.00235514	0.0457219
LOC103981532	1.78208	4.18959	0.0023791	0.0461505
LOC103996627	1.63961	3.6292	0.00238069	0.0461505
LOC103986106	-1.63289	4.27109	0.0023821	0.0461505
LOC103976473	2.36102	4.03064	0.00238454	0.0461662
LOC103969432	-1.55408	2.61843	0.00239324	0.0462841
LOC103989533	2.48826	3.19363	0.00239409	0.0462841
LOC103985302	2.75202	4.00301	0.00239715	0.0462841
LOC103988656	1.70543	3.12346	0.00239716	0.0462841
LOC103992708	-1.05865	5.63381	0.00243533	0.046989
LOC103970236	-2.44073	4.12483	0.002437	0.0469894
LOC103974929	-1.80891	4.04551	0.00244093	0.0470332
LOC103970521	1.74627	5.50218	0.00244716	0.0471028
LOC103969401	-1.65173	4.11663	0.00244787	0.0471028
LOC103995713	1.84657	4.15539	0.00245266	0.047163
LOC103990853	-1.35214	7.27539	0.00245457	0.0471677
LOC103982765	2.08027	8.5411	0.00245896	0.0472012
LOC103993320	-1.1141	4.59626	0.00245965	0.0472012
LOC103988275	-3.50014	6.12183	0.00247242	0.0474143
LOC103973763	1.45516	5.58841	0.00247697	0.0474413
LOC103979274	2.09028	1.96991	0.00247761	0.0474413
LOC103992009	1.13323	2.68779	0.00247959	0.0474413
LOC103971185	-2.61526	0.422072	0.00248053	0.0474413
LOC103990716	0.919606	5.17878	0.00248233	0.0474437
LOC103987676	-1.42536	3.63856	0.0024907	0.0475716
LOC103993219	2.47009	3.12183	0.00249434	0.0476091
LOC103984977	1.92467	2.90274	0.00249711	0.0476299
LOC103970104	-4.22527	0.937782	0.00250383	0.0477007
LOC103987634	2.25594	2.33038	0.00250419	0.0477007
LOC103992286	1.63327	5.09121	0.00251987	0.0479095
LOC103982871	1.47224	2.7048	0.00252007	0.0479095
LOC103983200	-1.4514	4.90665	0.00252022	0.0479095
LOC103988209	-3.21177	1.37513	0.0025326	0.0481125
LOC103998362	1.60775	4.74569	0.00253739	0.0481495
LOC103974046	1.97726	4.25271	0.00253794	0.0481495
LOC103994042	-1.40001	3.32607	0.0025411	0.0481532
LOC103969715	1.45251	2.02919	0.00254292	0.0481532
LOC103987070	2.87886	3.3096	0.00254419	0.0481532
LOC103995189	-2.10823	2.52069	0.00254493	0.0481532
LOC103994529	5.99256	-0.202191	0.00254863	0.048173
LOC103975633	1.3173	4.56084	0.00254938	0.048173
LOC103984201	2.93988	0.996898	0.00255142	0.0481796
LOC103989602	1.31496	5.46206	0.00255588	0.0482315
LOC103990745	1.09162	5.21783	0.00256109	0.0482978
LOC103968625	5.24916	1.52365	0.002572	0.0484713
LOC103978482	1.71099	7.08526	0.00258783	0.0487373
LOC103978245	1.96315	2.40049	0.00258958	0.0487378
LOC103993065	-2.45882	6.44294	0.00259286	0.0487671
LOC103987688	1.61556	4.6744	0.00259663	0.0488057
LOC103993391	-2.43638	1.893	0.00260492	0.0489004
LOC103992540	1.17635	6.87287	0.00260512	0.0489004
LOC103975984	2.2299	6.9382	0.00261033	0.0489657
LOC103970826	-3.29294	4.50991	0.00261505	0.0490218
LOC103993334	1.53751	3.62454	0.00262752	0.0492156
LOC103981780	1.93553	4.74194	0.00263128	0.0492156
LOC103971467	1.45919	4.43431	0.00263243	0.0492156
LOC103971732	-1.81157	3.21126	0.00263375	0.0492156
LOC103991773	3.12457	2.32592	0.00263425	0.0492156
LOC103988289	-1.87678	3.69978	0.0026358	0.0492156
LOC103997992	1.78575	3.54773	0.00263821	0.0492281
LOC103997025	2.89863	3.94966	0.00264668	0.0493535
LOC103993679	1.31895	4.58825	0.00265147	0.0494105
LOC103971269	-1.7889	2.76676	0.0026589	0.0495164
LOC103976955	-1.26334	3.12002	0.00266478	0.0495631
LOC103990058	2.07009	3.75285	0.00266491	0.0495631
LOC103973654	-1.52674	2.99687	0.0026776	0.0497666
LOC103992627	0.917233	10.0151	0.00268126	0.0498019
LOC103974407	-1.12983	5.16809	0.00268773	0.0498641
LOC103989292	-1.32474	5.21698	0.00268813	0.0498641
LOC103984031	-1.35519	3.9455	0.00269159	0.0498955
LOC103972992	1.02427	4.60378	0.00269858	0.0499926

## Sheet: Bacillus_96h_Full_List
NCBI Gene	log2FC	log2CPM	PValue	FDR
LOC103968644	5.37404	5.74403	8.49426e-34	2.40761e-29		Statistics and list of 1250 differentially expressed genes in treatment Bacillus 96h. See figure below.
LOC103972371	5.04347	4.0554	1.6495e-22	2.33767e-18
LOC103970139	4.38524	4.28301	3.04101e-22	2.87315e-18
LOC103980398	4.63244	6.10398	3.54215e-21	2.50996e-17
LOC103968833	-4.45789	9.73619	1.07396e-20	6.08805e-17
LOC103971548	3.81389	4.18554	1.21301e-19	5.73027e-16
LOC103996582	-4.92825	7.10902	4.25204e-18	1.68578e-14
LOC103975648	5.57827	8.84484	4.75807e-18	1.68578e-14
LOC103997319	6.14107	4.80505	1.88172e-17	5.92616e-14
LOC103998091	-5.70211	5.14395	3.60659e-17	9.93139e-14
LOC103990723	3.83064	9.02686	3.85426e-17	9.93139e-14
LOC103996584	-4.21356	5.9103	2.49049e-16	5.88254e-13
LOC103973318	-7.34897	3.75016	5.04313e-16	1.09956e-12
LOC103986537	4.85861	4.54662	5.58344e-16	1.13041e-12
LOC103992923	2.6546	4.78994	6.07389e-15	1.14772e-11
LOC103999142	3.50946	4.5996	7.56727e-15	1.34054e-11
LOC103976295	-3.73581	4.49701	4.24884e-14	7.08406e-11
LOC103972338	3.09111	6.86826	1.14842e-13	1.80838e-10
LOC103976685	-8.48311	2.34222	2.07258e-13	3.09186e-10
LOC103981366	5.88067	7.24376	2.65795e-13	3.76685e-10
LOC103986775	5.14023	6.44166	2.95878e-13	3.99351e-10
LOC103971804	-2.4346	6.28387	3.54383e-13	4.56574e-10
LOC103986341	2.65698	4.65247	6.66396e-13	7.97613e-10
LOC103994454	3.95173	2.83038	6.75371e-13	7.97613e-10
LOC103996261	-2.91872	4.83492	7.88403e-13	8.9386e-10
LOC103987361	4.73828	7.62421	1.28225e-12	1.39785e-09
LOC104000746	-3.91804	7.82577	1.74199e-12	1.8287e-09
LOC103991952	2.8483	5.21626	2.36225e-12	2.39128e-09
LOC103978608	-3.60627	4.56009	2.86674e-12	2.8019e-09
LOC103975650	5.69973	6.13877	3.58288e-12	3.3851e-09
LOC103995969	-5.78908	6.13117	4.03325e-12	3.68769e-09
LOC103986984	4.63157	8.26089	4.5232e-12	4.00642e-09
LOC103979997	6.33297	4.78545	6.91529e-12	5.85313e-09
LOC103998486	-3.93591	3.99581	7.02111e-12	5.85313e-09
LOC103984804	2.63351	4.22271	8.08414e-12	6.54677e-09
LOC103998703	4.26382	6.16606	8.55558e-12	6.73609e-09
LOC103990508	4.41558	7.82717	1.08927e-11	8.34439e-09
LOC103998816	4.65578	6.63067	1.63722e-11	1.2212e-08
LOC103972892	8.90843	2.46914	1.86052e-11	1.35217e-08
LOC103994336	5.03253	3.91425	2.32596e-11	1.64817e-08
LOC104000307	3.25151	6.49535	2.87907e-11	1.97759e-08
LOC103985192	4.85632	7.00134	3.02008e-11	1.97759e-08
LOC103985522	4.56661	9.76509	3.03996e-11	1.97759e-08
LOC103997576	6.79484	8.04815	3.06992e-11	1.97759e-08
LOC104001019	4.03127	5.20216	3.67793e-11	2.3166e-08
LOC103973189	4.60216	4.58399	3.76416e-11	2.31938e-08
LOC103989178	-2.70394	5.12812	4.00773e-11	2.41692e-08
LOC103991938	-4.29218	11.434	4.15104e-11	2.45119e-08
LOC103970798	-2.42333	5.3873	1.25761e-10	7.27462e-08
LOC104000178	3.40479	8.1245	1.70764e-10	9.68028e-08
LOC103986657	3.87671	6.01913	1.99725e-10	1.11e-07
LOC103972273	4.57714	3.00597	3.26325e-10	1.77872e-07
LOC103988171	3.8362	3.76905	3.56445e-10	1.90624e-07
LOC103989635	2.89403	7.96602	3.76755e-10	1.97755e-07
LOC103999385	3.09722	9.27367	4.17132e-10	2.11136e-07
LOC103974142	3.94329	7.01742	4.23311e-10	2.11136e-07
LOC103995455	3.66803	8.00378	4.3045e-10	2.11136e-07
LOC103997814	3.61083	4.23757	4.32045e-10	2.11136e-07
LOC103988504	4.06349	9.01421	4.41469e-10	2.12085e-07
LOC103987223	3.98416	6.10631	4.68544e-10	2.20251e-07
LOC103978481	3.52837	5.18657	4.74008e-10	2.20251e-07
LOC103992213	5.95636	6.72706	6.02996e-10	2.75666e-07
LOC103972957	5.77834	3.84099	6.19693e-10	2.78803e-07
LOC103970659	-4.67639	3.84193	6.68438e-10	2.92866e-07
LOC103987935	4.17481	3.95531	6.71617e-10	2.92866e-07
LOC103992690	4.0928	8.55179	7.1166e-10	3.05626e-07
LOC103995933	2.26933	6.87418	8.07019e-10	3.41405e-07
LOC103998694	3.94902	6.44937	8.67233e-10	3.5855e-07
LOC103968921	4.2522	7.10432	8.72846e-10	3.5855e-07
LOC103990423	2.88489	6.77255	1.03912e-09	4.20754e-07
LOC103968821	-4.70417	4.87864	1.14567e-09	4.57364e-07
LOC103999795	-5.30123	2.16241	1.23249e-09	4.8519e-07
LOC103998990	4.32841	3.93318	1.35741e-09	5.22275e-07
LOC103972451	3.93567	3.98473	1.36355e-09	5.22275e-07
LOC103986181	2.71541	8.66916	1.49048e-09	5.56009e-07
LOC103993377	4.09619	6.95508	1.49085e-09	5.56009e-07
LOC103986608	4.50676	7.8476	1.53493e-09	5.60542e-07
LOC103997858	2.52076	5.74986	1.54256e-09	5.60542e-07
LOC103992294	2.29501	6.9504	1.83165e-09	6.57169e-07
LOC103983246	4.81055	6.9659	1.95772e-09	6.9362e-07
LOC103968977	2.83403	7.65751	2.22024e-09	7.7692e-07
LOC103996984	2.62729	5.185	2.76822e-09	9.56857e-07
LOC103972223	3.14346	5.74868	2.85257e-09	9.74136e-07
LOC103977654	-3.56808	7.11085	2.9132e-09	9.82997e-07
LOC103997178	3.8533	6.62482	2.97012e-09	9.90413e-07
LOC103986057	3.28895	4.17372	3.16469e-09	1.03684e-06
LOC103982461	7.99461	4.7528	3.18252e-09	1.03684e-06
LOC103999704	4.43561	7.41225	3.38802e-09	1.08344e-06
LOC103992170	3.21517	7.61302	3.40199e-09	1.08344e-06
LOC103989649	4.37461	3.5733	3.69896e-09	1.1566e-06
LOC103968611	3.88582	4.00821	3.71334e-09	1.1566e-06
LOC103992086	2.38729	3.94246	4.87532e-09	1.4936e-06
LOC103973161	3.5493	7.82936	4.90066e-09	1.4936e-06
LOC103987224	3.43783	6.96563	5.96442e-09	1.79846e-06
LOC103992496	3.83849	3.18063	6.39169e-09	1.90701e-06
LOC103990849	4.32629	5.57914	7.1806e-09	2.12007e-06
LOC103975054	6.43381	6.30274	7.37176e-09	2.15407e-06
LOC103968378	3.86196	6.23639	8.07412e-09	2.33523e-06
LOC103975027	4.29747	8.4144	8.23033e-09	2.35637e-06
LOC103971288	4.37673	2.57586	9.21062e-09	2.61066e-06
LOC103992540	2.31212	6.87287	9.93077e-09	2.78691e-06
LOC103968345	5.07441	5.8046	1.00639e-08	2.79659e-06
LOC103979987	2.95227	7.48647	1.02751e-08	2.82756e-06
LOC103971974	2.97599	6.87893	1.27881e-08	3.48525e-06
LOC103992310	3.61202	4.76241	1.31984e-08	3.56282e-06
LOC103990019	5.05432	3.55757	1.33632e-08	3.57327e-06
LOC103975278	3.34679	4.74288	1.36365e-08	3.61227e-06
LOC103977229	2.50001	8.21766	1.41727e-08	3.71956e-06
LOC103991615	4.90699	5.22779	1.58986e-08	4.13421e-06
LOC103992519	3.40828	7.37289	1.69555e-08	4.36897e-06
LOC103978505	2.47516	8.42559	1.86615e-08	4.76523e-06
LOC103992275	4.99798	6.44112	1.90275e-08	4.81533e-06
LOC103986727	4.34879	6.35543	2.0218e-08	5.07131e-06
LOC103992627	1.74021	10.0151	2.35653e-08	5.82925e-06
LOC104000318	3.62413	4.88802	2.3651e-08	5.82925e-06
LOC103982057	3.2493	3.96462	2.40311e-08	5.87188e-06
LOC103969234	3.5571	3.05489	2.44462e-08	5.92225e-06
LOC103974030	2.75223	9.14648	2.61952e-08	6.29219e-06
LOC103992133	2.5034	4.53013	2.7428e-08	6.53294e-06
LOC103977175	-4.70272	2.14854	2.89951e-08	6.84865e-06
LOC103978936	-2.24867	7.84216	3.1198e-08	7.30806e-06
LOC103984247	6.09067	7.07821	3.44635e-08	8.00684e-06
LOC103995679	4.21685	3.99504	3.55702e-08	8.15656e-06
LOC103987692	3.22692	7.98006	3.56835e-08	8.15656e-06
LOC103975096	2.76966	5.83666	3.61645e-08	8.17865e-06
LOC103989554	4.7248	5.26914	3.63572e-08	8.17865e-06
LOC103997368	2.64242	3.36706	3.93351e-08	8.77885e-06
LOC103999445	-3.67931	3.77583	4.1093e-08	9.09952e-06
LOC103991273	-3.46973	6.30295	4.42016e-08	9.71202e-06
LOC103980817	3.56472	3.25784	4.82496e-08	1.05199e-05
LOC103997181	2.42655	7.39211	5.03905e-08	1.09028e-05
LOC103969642	3.05809	6.05451	5.08194e-08	1.09123e-05
LOC104000458	1.92362	5.47267	5.86721e-08	1.25038e-05
LOC103970293	4.38861	3.74576	6.24058e-08	1.31414e-05
LOC103978549	-2.15965	5.37103	6.25911e-08	1.31414e-05
LOC104000196	3.68453	6.91704	6.30769e-08	1.3146e-05
LOC103973007	3.62043	4.86198	6.39642e-08	1.31906e-05
LOC103969608	4.91397	8.04688	6.42216e-08	1.31906e-05
LOC103991515	2.62381	7.89444	7.27097e-08	1.48265e-05
LOC103996200	2.51196	7.10648	7.34849e-08	1.48776e-05
LOC103978408	4.05853	5.58958	7.70467e-08	1.5488e-05
LOC103980353	2.30905	5.94283	7.89943e-08	1.57677e-05
LOC103976855	1.89126	4.7384	8.52276e-08	1.6884e-05
LOC103989972	3.80408	6.33855	8.57784e-08	1.6884e-05
LOC103994530	2.70471	4.51383	9.15821e-08	1.79021e-05
LOC103979080	2.36519	8.7047	9.32351e-08	1.81004e-05
LOC103984628	6.41627	6.81541	9.51144e-08	1.83396e-05
LOC103996563	5.12403	4.17624	1.12201e-07	2.14879e-05
LOC103992856	-2.38378	5.97333	1.16763e-07	2.22116e-05
LOC103975164	4.25505	2.87898	1.44096e-07	2.72284e-05
LOC103981440	-2.6605	3.78709	1.52692e-07	2.86617e-05
LOC104000016	6.967	2.72837	1.56365e-07	2.9158e-05
LOC103977424	-3.70847	4.63391	1.58344e-07	2.93341e-05
LOC103995280	3.11309	4.98725	1.65362e-07	3.04351e-05
LOC103989081	3.50807	4.22122	1.74039e-07	3.18255e-05
LOC103978994	2.42717	7.29774	1.81236e-07	3.29292e-05
LOC103998047	3.81765	6.64086	1.89529e-07	3.42167e-05
LOC103983858	6.65229	3.3729	1.97368e-07	3.53015e-05
LOC103979811	-1.86594	7.27021	1.98029e-07	3.53015e-05
LOC103993333	-3.83704	4.83311	2.08732e-07	3.69769e-05
LOC103998289	-2.07163	6.4898	2.151e-07	3.78683e-05
LOC103989520	3.58623	3.39833	2.17286e-07	3.8017e-05
LOC103984567	3.35667	5.8053	2.2043e-07	3.83305e-05
LOC103984066	2.769	4.53122	2.25587e-07	3.8988e-05
LOC103984030	5.1047	3.25978	2.29015e-07	3.91679e-05
LOC103999647	3.49046	7.5402	2.30064e-07	3.91679e-05
LOC103991030	-5.98685	6.9662	2.30773e-07	3.91679e-05
LOC103977207	2.66038	4.96335	2.33491e-07	3.93932e-05
LOC103984209	3.38545	7.14454	2.48273e-07	4.16393e-05
LOC103988681	2.44532	6.90369	2.52034e-07	4.20215e-05
LOC103977190	2.65607	7.13799	2.55286e-07	4.23148e-05
LOC103984127	4.22229	3.58254	2.57752e-07	4.24752e-05
LOC103987688	2.87575	4.6744	2.60912e-07	4.27474e-05
LOC103979760	2.27633	3.59432	2.74051e-07	4.4542e-05
LOC103995162	-3.34134	3.50991	2.75009e-07	4.4542e-05
LOC103972785	3.48199	4.8043	2.88092e-07	4.63959e-05
LOC103989987	1.93541	6.00745	2.91122e-07	4.6619e-05
LOC103985017	3.87647	4.086	3.10289e-07	4.90332e-05
LOC103969371	-3.17479	4.62189	3.12961e-07	4.90332e-05
LOC103976149	3.48735	6.62092	3.14119e-07	4.90332e-05
LOC103978567	-2.4656	5.1902	3.1586e-07	4.90332e-05
LOC103996869	-2.8644	4.99952	3.16204e-07	4.90332e-05
LOC103979546	2.57125	6.58384	3.18015e-07	4.90332e-05
LOC103982340	3.48577	6.4883	3.18308e-07	4.90332e-05
LOC103974217	4.76935	3.49094	3.21139e-07	4.9202e-05
LOC103984237	5.63338	6.28264	3.32724e-07	5.05627e-05
LOC103992727	3.89052	2.54931	3.35283e-07	5.05627e-05
LOC103976405	5.66885	2.32888	3.35372e-07	5.05627e-05
LOC103986497	3.49508	6.43189	3.45025e-07	5.17428e-05
LOC103972057	6.50082	4.17236	3.4788e-07	5.18963e-05
LOC103997701	3.30568	5.82962	3.52968e-07	5.23797e-05
LOC103971058	-3.34095	3.79153	3.71351e-07	5.48207e-05
LOC103970414	2.06471	5.01337	3.98042e-07	5.84564e-05
LOC103992023	2.37761	6.71831	4.01693e-07	5.86885e-05
LOC103988712	-2.34135	3.28806	4.11043e-07	5.97467e-05
LOC103992433	2.35548	8.75188	4.18118e-07	6.04649e-05
LOC103993281	2.55212	4.4183	4.69437e-07	6.73876e-05
LOC103986376	-2.71678	2.67939	4.70743e-07	6.73876e-05
LOC104000331	3.723	6.92327	4.77886e-07	6.80664e-05
LOC103998361	2.95063	5.39928	4.91655e-07	6.96774e-05
LOC103981825	-2.71631	5.8823	4.97881e-07	7.02087e-05
LOC103982658	2.21488	6.2269	5.03075e-07	7.05899e-05
LOC103969152	2.63572	6.83292	5.28978e-07	7.38589e-05
LOC103989339	-3.788	6.9253	5.32572e-07	7.39962e-05
LOC103997204	2.48836	5.66311	5.58287e-07	7.71906e-05
LOC103996634	-2.37891	4.02142	5.70231e-07	7.84593e-05
LOC103991704	1.78193	5.91162	5.80361e-07	7.94674e-05
LOC103979711	2.76994	4.35064	5.84726e-07	7.96801e-05
LOC103993803	-3.0476	8.95745	5.89547e-07	7.99528e-05
LOC103982557	2.63374	7.41412	5.96577e-07	8.04113e-05
LOC103997286	4.01121	6.25233	5.98602e-07	8.04113e-05
LOC103969204	-1.97749	5.01601	6.54203e-07	8.71225e-05
LOC103990214	-4.22528	7.76939	6.5471e-07	8.71225e-05
LOC103979054	3.04442	8.5063	6.90271e-07	9.14255e-05
LOC103999070	5.80949	2.30632	7.02625e-07	9.26289e-05
LOC103983700	-3.78554	4.62297	7.59991e-07	9.97277e-05
LOC103991469	-1.60926	5.70437	7.83697e-07	0.000102365
LOC103976360	1.84249	5.88644	8.12483e-07	0.000105638
LOC103976263	2.47401	7.63761	8.40408e-07	0.00010877
LOC104000185	3.72972	3.83212	8.85143e-07	0.000114039
LOC103989587	3.80565	4.06419	8.98022e-07	0.000115174
LOC103995322	5.32869	3.52291	9.32609e-07	0.000119071
LOC103997113	2.4941	6.90895	9.73071e-07	0.00012368
LOC103969480	2.37007	6.06414	1.04172e-06	0.000131815
LOC103993528	2.74117	5.24717	1.06426e-06	0.000134069
LOC103997922	3.27837	6.41921	1.10004e-06	0.000137963
LOC103972300	6.39707	9.94279	1.12026e-06	0.00013988
LOC104000193	3.79009	5.2242	1.15333e-06	0.000143377
LOC104000187	1.69547	4.83126	1.23026e-06	0.000152273
LOC103971388	1.99514	4.79275	1.23791e-06	0.000152554
LOC103993224	3.21205	4.83063	1.28029e-06	0.000157093
LOC103996303	2.54273	4.90817	1.29554e-06	0.000158279
LOC103991950	2.1698	6.56637	1.30203e-06	0.000158389
LOC103973160	2.12499	4.06652	1.32384e-06	0.000160354
LOC103988314	3.5004	3.64745	1.48226e-06	0.00017878
LOC103978033	4.6804	0.907154	1.54262e-06	0.000185272
LOC103990102	3.42296	6.06826	1.5712e-06	0.000187908
LOC103986499	3.74207	3.46141	1.60058e-06	0.000190616
LOC103989384	4.88822	3.69746	1.71857e-06	0.000203812
LOC103984185	-2.38274	3.61667	1.73713e-06	0.000205155
LOC103971944	6.50933	3.10776	1.76114e-06	0.000207127
LOC103975908	3.93667	6.41882	1.79589e-06	0.000210342
LOC103999127	2.58444	8.01073	1.83929e-06	0.000214538
LOC103998782	3.06342	1.96332	1.95854e-06	0.000227511
LOC103999997	5.98788	4.28635	1.9837e-06	0.000229494
LOC103977864	1.94612	5.51288	1.99237e-06	0.000229559
LOC103973607	5.18196	5.29574	2.04961e-06	0.000235199
LOC103998483	-2.97092	2.9033	2.05835e-06	0.000235249
LOC104000374	-1.98199	4.31183	2.09547e-06	0.000237601
LOC103996583	-3.75826	4.58769	2.09569e-06	0.000237601
LOC103987473	3.57004	4.88255	2.13479e-06	0.000240299
LOC103972093	-3.25752	5.96556	2.13645e-06	0.000240299
LOC103997682	3.53432	7.70236	2.15959e-06	0.000241005
LOC103982312	4.75216	3.16097	2.15973e-06	0.000241005
LOC103989406	-2.3579	3.99388	2.25419e-06	0.000250559
LOC103982343	6.24086	2.00209	2.35335e-06	0.00026056
LOC103981538	2.72979	3.98608	2.61726e-06	0.000288652
LOC103997675	5.21626	4.94944	2.70547e-06	0.000297224
LOC103995575	2.5095	10.0244	2.80989e-06	0.000307504
LOC103981700	4.0682	5.88656	2.9461e-06	0.00032117
LOC103989091	-1.5467	5.84877	2.97315e-06	0.000322877
LOC103992743	2.76494	3.74099	3.01161e-06	0.000325805
LOC103975993	3.05007	6.60138	3.03008e-06	0.000326557
LOC103980249	-2.75687	4.00164	3.09873e-06	0.000330449
LOC103984200	3.63092	3.43002	3.10351e-06	0.000330449
LOC104001030	3.32272	5.22785	3.10924e-06	0.000330449
LOC103969384	3.61712	3.91991	3.11283e-06	0.000330449
LOC103973577	3.49642	5.76098	3.15438e-06	0.000333267
LOC104000337	3.56685	6.5979	3.16289e-06	0.000333267
LOC103974847	5.2629	7.41448	3.17634e-06	0.000333445
LOC103976540	3.44897	5.31068	3.20029e-06	0.000334719
LOC103985911	5.82112	5.80592	3.26418e-06	0.000340146
LOC103976012	2.13175	7.67944	3.30536e-06	0.000343176
LOC103991942	1.67098	5.29915	3.52696e-06	0.000364847
LOC103970629	3.94215	3.789	3.682e-06	0.000379204
LOC103989220	2.76678	6.59654	3.6925e-06	0.000379204
LOC103976375	4.39107	5.80809	3.93987e-06	0.000403147
LOC103977612	3.53089	5.03742	4.01412e-06	0.000409267
LOC103992196	1.67247	4.09587	4.03924e-06	0.000410352
LOC103997578	6.67757	2.12564	4.10299e-06	0.00041534
LOC103990768	-3.01336	5.6237	4.12867e-06	0.000416452
LOC103971468	-2.56652	5.73421	4.21841e-06	0.000423995
LOC103969056	2.752	6.26787	4.33444e-06	0.000434117
LOC104000288	-4.30129	1.84548	4.38722e-06	0.000437857
LOC103978246	2.33888	3.94817	4.60715e-06	0.000458193
LOC103975709	-3.90028	5.08422	4.69994e-06	0.000465788
LOC103995106	-2.42213	5.10586	4.78863e-06	0.000472923
LOC103987158	-2.49135	7.02389	4.88553e-06	0.000480551
LOC103979132	-1.9242	4.33665	4.91155e-06	0.000480551
LOC103985238	3.41783	6.99607	4.91698e-06	0.000480551
LOC103989689	1.86792	6.23033	4.93368e-06	0.000480551
LOC103991493	2.04548	6.09858	4.96215e-06	0.000481668
LOC103975731	-2.23206	5.72293	5.13689e-06	0.000496928
LOC103977103	2.37864	4.35487	5.1603e-06	0.000497197
LOC103991826	3.78769	5.76382	5.17475e-06	0.000497197
LOC103983206	1.68152	8.42168	5.42854e-06	0.000519819
LOC103975374	4.26128	2.2212	5.59947e-06	0.000532928
LOC103981875	2.7909	5.39516	5.60304e-06	0.000532928
LOC103997697	-3.79851	6.11054	5.63335e-06	0.000534019
LOC103991382	-3.89307	3.4904	5.92301e-06	0.000559606
LOC103989093	-2.24365	7.05002	6.01753e-06	0.000566647
LOC103994478	-1.92885	4.0172	6.04275e-06	0.000567138
LOC103971808	-2.32261	4.40196	6.10306e-06	0.00057009
LOC103971767	1.96418	5.05853	6.11443e-06	0.00057009
LOC103986066	-2.83375	6.676	6.31491e-06	0.000586685
LOC103974976	-3.70108	6.14462	6.33382e-06	0.000586685
LOC103986656	3.89977	3.2419	6.41339e-06	0.000592121
LOC103991639	3.75805	6.32944	6.66848e-06	0.000613674
LOC103970428	3.96773	5.97076	6.70636e-06	0.000615162
LOC103997830	2.79712	6.70198	6.79184e-06	0.000619089
LOC103995773	1.86718	3.56861	6.79286e-06	0.000619089
LOC103995646	-2.79071	5.56814	7.06045e-06	0.000641358
LOC103992184	4.01199	5.51255	7.08245e-06	0.000641358
LOC103976699	2.36455	7.87672	7.22024e-06	0.000651015
LOC103992106	-1.70813	6.04452	7.23504e-06	0.000651015
LOC104000009	4.31385	1.02626	7.26973e-06	0.000652067
LOC103970742	3.3295	5.93501	7.32287e-06	0.000654761
LOC103997560	1.87383	4.77574	7.36914e-06	0.000655611
LOC103991989	-1.51755	7.15848	7.37864e-06	0.000655611
LOC103990407	-1.46134	3.99726	7.49609e-06	0.000663966
LOC103995187	2.73879	5.05369	7.52948e-06	0.000664846
LOC103994671	4.28543	6.18568	7.6084e-06	0.000669728
LOC103987484	5.37338	1.42217	7.68439e-06	0.000671445
LOC103986197	4.23069	4.89717	7.71055e-06	0.000671445
LOC103998448	2.95654	5.76471	7.71816e-06	0.000671445
LOC103989540	-2.12996	5.65507	7.72266e-06	0.000671445
LOC104000996	3.14598	3.40567	7.85986e-06	0.000681284
LOC103968936	4.24069	9.76291	7.96469e-06	0.000688266
LOC103980152	-2.84302	4.44629	8.29236e-06	0.000714404
LOC103997644	2.37584	8.03874	8.34885e-06	0.00071709
LOC103995567	-1.92889	4.7372	8.54108e-06	0.000731385
LOC103999774	3.14542	5.13269	8.60941e-06	0.000734993
LOC103976146	2.41953	6.97416	8.6571e-06	0.000734993
LOC103991748	3.64969	6.66092	8.6778e-06	0.000734993
LOC103972282	2.23789	8.76365	8.68694e-06	0.000734993
LOC103988039	-1.68403	4.97792	8.75933e-06	0.000738605
LOC103996029	-2.15554	3.77105	8.78952e-06	0.000738605
LOC103998589	1.62505	3.86562	8.80781e-06	0.000738605
LOC103981791	2.17471	5.06455	9.4513e-06	0.000790229
LOC103989706	1.9551	8.28144	9.57362e-06	0.000796303
LOC103984579	3.65192	7.39572	9.58014e-06	0.000796303
LOC103998554	2.12599	5.42709	9.70637e-06	0.000804436
LOC103996704	1.94673	3.30627	9.7354e-06	0.000804491
LOC103989668	3.59484	5.61405	9.99125e-06	0.000823233
LOC103990684	-1.57623	4.24849	1.01233e-05	0.000831696
LOC103997416	2.29164	6.04292	1.01845e-05	0.000834307
LOC103975026	3.48738	5.17287	1.04204e-05	0.000851174
LOC103986053	3.50363	3.69163	1.08624e-05	0.000884725
LOC103994672	4.12799	6.63665	1.09706e-05	0.000890975
LOC103976102	3.78122	2.75502	1.10797e-05	0.000897262
LOC103989579	3.4277	8.0628	1.14692e-05	0.00092616
LOC103998624	2.42209	6.9514	1.16508e-05	0.000937152
LOC103982876	-1.93093	5.08452	1.16714e-05	0.000937152
LOC103994674	2.91775	5.50606	1.17136e-05	0.00093788
LOC103983145	2.19131	3.38641	1.18778e-05	0.000948351
LOC103995189	-3.20977	2.52069	1.20081e-05	0.000956062
LOC103973608	2.51753	4.98703	1.20638e-05	0.000957802
LOC103970087	2.49076	7.67615	1.22389e-05	0.000968994
LOC103969672	2.48026	5.10214	1.25999e-05	0.000993934
LOC103992986	-3.82559	1.45995	1.26241e-05	0.000993934
LOC103992798	-5.79716	1.24885	1.26857e-05	0.000996017
LOC103986747	-1.75611	4.36992	1.30669e-05	0.00102312
LOC103973385	2.25571	4.57302	1.35849e-05	0.00106074
LOC103968359	-3.55597	5.50936	1.37129e-05	0.0010678
LOC103995854	-3.67062	8.67163	1.37601e-05	0.00106854
LOC103997039	4.37681	3.44519	1.38883e-05	0.00107555
LOC103974587	3.74168	1.71091	1.3959e-05	0.00107808
LOC103972782	2.95813	6.07538	1.43198e-05	0.00110293
LOC103982935	4.03601	6.9443	1.43655e-05	0.00110346
LOC103981398	-3.14188	7.27918	1.44754e-05	0.00110694
LOC103997467	1.76076	7.33293	1.44889e-05	0.00110694
LOC103971281	-4.6913	4.39723	1.48595e-05	0.0011322
LOC103968707	2.04247	3.31082	1.51533e-05	0.00115149
LOC103987289	1.88182	6.95785	1.53282e-05	0.00116166
LOC103999297	1.82238	4.7535	1.54098e-05	0.00116473
LOC103992465	-2.43343	6.78393	1.5483e-05	0.00116586
LOC103981745	3.70836	7.65758	1.55475e-05	0.00116586
LOC103999329	6.77117	2.25245	1.55482e-05	0.00116586
LOC103977717	-3.88268	6.13434	1.5735e-05	0.00117676
LOC103987167	-3.01003	4.41332	1.59222e-05	0.00118763
LOC103977167	2.58422	4.3413	1.61157e-05	0.0011982
LOC103983818	2.6514	4.68619	1.61484e-05	0.0011982
LOC103991167	-6.99908	-0.665001	1.62179e-05	0.00120021
LOC103999026	2.07288	4.00976	1.62967e-05	0.0012029
LOC104000872	1.56088	5.3553	1.65436e-05	0.00121795
LOC103971827	1.83879	3.09556	1.65891e-05	0.00121814
LOC103976377	6.88075	1.01245	1.6639e-05	0.00121864
LOC103974846	3.96605	8.83221	1.6729e-05	0.00122208
LOC103986336	-1.64295	6.22204	1.69575e-05	0.00123559
LOC103985302	4.13768	4.00301	1.71333e-05	0.0012452
LOC103968739	2.39081	4.08955	1.7204e-05	0.00124713
LOC103984282	2.77983	7.18903	1.72736e-05	0.00124899
LOC103982188	-4.85502	2.58398	1.79464e-05	0.00129433
LOC103998933	2.99976	3.04406	1.80131e-05	0.00129585
LOC103978715	-5.06799	1.23411	1.80631e-05	0.00129615
LOC103979567	2.92902	1.92353	1.8477e-05	0.00132251
LOC103987539	3.2873	6.18508	1.86716e-05	0.00133307
LOC103970316	4.64327	4.66947	1.88021e-05	0.00133786
LOC103977443	-1.76383	3.55517	1.88331e-05	0.00133786
LOC103970270	2.22791	5.30186	1.93439e-05	0.00137071
LOC103992644	-1.57059	7.40528	1.94984e-05	0.00137821
LOC104000271	-1.71838	3.82462	2.13296e-05	0.00150389
LOC103998622	2.50683	4.08249	2.15042e-05	0.00151244
LOC103998066	-1.63098	6.09173	2.1902e-05	0.00153661
LOC103997199	4.14146	5.33092	2.19925e-05	0.00153915
LOC103969209	-5.83049	4.17759	2.231e-05	0.00155753
LOC103980088	2.5756	6.68037	2.2507e-05	0.00156741
LOC103993575	2.88583	4.23628	2.27967e-05	0.0015837
LOC103992117	2.0677	5.38843	2.29013e-05	0.00158707
LOC103972331	-1.84765	3.61204	2.29852e-05	0.00158901
LOC103975647	4.64042	3.51879	2.31194e-05	0.00159439
LOC103998260	7.68908	0.352969	2.32214e-05	0.00159754
LOC103995242	-3.08971	5.16956	2.41505e-05	0.00165744
LOC103968687	-1.53656	6.50714	2.45013e-05	0.00167745
LOC103988469	-3.02209	2.38772	2.51664e-05	0.00171883
LOC103992816	2.76634	5.52005	2.52497e-05	0.00172038
LOC103977957	4.11842	4.03921	2.56191e-05	0.00174136
LOC103998306	2.59447	6.14225	2.57394e-05	0.00174536
LOC103991591	2.96796	5.98399	2.61393e-05	0.00176824
LOC103997381	1.84159	5.45928	2.75809e-05	0.00186132
LOC103989930	-3.19165	1.68391	2.7723e-05	0.0018627
LOC103991966	3.76772	4.70746	2.77328e-05	0.0018627
LOC103968356	3.0061	2.27215	2.86128e-05	0.00191726
LOC103979164	-1.99342	4.42299	2.88736e-05	0.00193017
LOC103997423	2.6197	6.11914	2.92867e-05	0.00195318
LOC103975634	2.25822	7.49881	2.95052e-05	0.00196313
LOC103972274	2.11208	3.39142	3.15423e-05	0.00209376
LOC103978845	5.41869	0.0906357	3.24907e-05	0.00215168
LOC103996951	-2.42202	3.43654	3.38596e-05	0.00223417
LOC103994005	1.79369	3.5062	3.3894e-05	0.00223417
LOC103978911	-1.55539	6.78115	3.43867e-05	0.00226138
LOC103994878	3.92838	4.26349	3.45323e-05	0.00226571
LOC103983075	2.56838	7.5551	3.46953e-05	0.00226653
LOC103985304	-3.20119	5.7444	3.47049e-05	0.00226653
LOC103994588	1.39418	4.4078	3.52201e-05	0.00229489
LOC103998403	-1.85992	5.26382	3.54925e-05	0.00230734
LOC103989843	4.01414	3.50595	3.56136e-05	0.00230782
LOC103984088	-1.64773	5.39821	3.56628e-05	0.00230782
LOC103981407	1.94394	6.15724	3.6879e-05	0.00238109
LOC103983379	-1.57114	10.3902	3.77783e-05	0.00243361
LOC103983871	3.75431	5.73955	3.79504e-05	0.00243915
LOC104000233	-3.39859	5.51512	3.98532e-05	0.00254927
LOC103969565	2.00994	3.88882	3.99107e-05	0.00254927
LOC103981974	-1.86945	3.85655	3.99335e-05	0.00254927
LOC103991592	1.78563	4.89899	4.03237e-05	0.00256839
LOC103995977	-2.2527	4.52917	4.05462e-05	0.00257677
LOC103969405	1.70622	5.47563	4.09789e-05	0.00259845
LOC103998908	-1.47562	4.93948	4.13373e-05	0.00261532
LOC103980093	2.62117	3.4281	4.21116e-05	0.00265838
LOC104000467	1.67671	6.87736	4.24587e-05	0.00267433
LOC103982436	3.39509	5.76161	4.27695e-05	0.00268793
LOC103972143	3.16352	9.06754	4.34372e-05	0.00271858
LOC103978167	1.81998	4.91314	4.34489e-05	0.00271858
LOC103969749	2.32267	5.63602	4.48266e-05	0.0027986
LOC103972809	1.74808	3.87651	4.49545e-05	0.00280042
LOC103994551	-2.53464	8.05611	4.54111e-05	0.00282266
LOC103997989	-2.89059	3.21364	4.56639e-05	0.00283216
LOC103996274	2.77602	4.89394	4.77211e-05	0.00295329
LOC103971103	-2.22252	4.55117	4.7943e-05	0.00296056
LOC103987488	1.20499	5.01503	4.83848e-05	0.00298135
LOC103995862	-2.79619	8.60539	4.85983e-05	0.002988
LOC103988229	2.50027	5.69766	4.91773e-05	0.00301706
LOC103994503	1.44458	4.98902	5.00123e-05	0.00306166
LOC103995572	-3.53468	2.57552	5.03222e-05	0.00307099
LOC103994906	-2.70706	4.28215	5.03814e-05	0.00307099
LOC103989297	2.12252	4.72974	5.06968e-05	0.00308006
LOC103985469	2.16765	4.33682	5.08246e-05	0.00308006
LOC103975635	1.78729	4.24158	5.08562e-05	0.00308006
LOC103983643	3.3555	8.7966	5.22329e-05	0.00315091
LOC103974933	-1.80744	6.25729	5.22483e-05	0.00315091
LOC103991514	1.9563	7.58894	5.30308e-05	0.00319131
LOC103969924	3.22295	4.52349	5.34962e-05	0.00321249
LOC103975791	2.14759	1.91787	5.36513e-05	0.00321499
LOC103970060	-1.23904	6.02449	5.44362e-05	0.00325515
LOC103973925	-1.48826	5.21071	5.45546e-05	0.00325536
LOC103977951	-3.32067	8.02552	5.58302e-05	0.00332448
LOC103986119	2.05039	4.05556	5.61821e-05	0.00333842
LOC103975482	2.84446	2.35052	5.68709e-05	0.00337228
LOC103992216	2.39889	7.32913	5.7923e-05	0.00342749
LOC103992910	1.9685	9.27629	5.80615e-05	0.00342853
LOC103981259	-1.25873	5.48219	5.87914e-05	0.00346441
LOC103976374	-4.43836	1.43046	5.96051e-05	0.00350508
LOC103991516	2.08286	7.74818	6.03529e-05	0.0035417
LOC103982031	3.41034	6.55442	6.11395e-05	0.00358045
LOC103976440	1.40711	5.97904	6.14137e-05	0.00358909
LOC103983119	-1.73451	5.96461	6.16027e-05	0.00359273
LOC103970068	1.89979	3.13023	6.26941e-05	0.00364493
LOC103990191	-1.72336	5.56048	6.2755e-05	0.00364493
LOC103983146	2.7586	3.01508	6.44475e-05	0.00373558
LOC103982634	2.45091	2.57521	6.46106e-05	0.00373739
LOC103995288	3.26923	3.92874	6.49101e-05	0.00374081
LOC103988407	-3.05212	2.55401	6.49337e-05	0.00374081
LOC103987751	-1.70998	6.91636	6.55372e-05	0.00376793
LOC103990466	2.61802	2.80987	6.65217e-05	0.00381678
LOC103994179	-2.54957	3.96665	6.6956e-05	0.00383394
LOC103969336	1.75195	6.99504	6.83955e-05	0.00390847
LOC103992375	2.738	7.22365	6.88978e-05	0.00392925
LOC103971273	1.46739	6.40506	6.90869e-05	0.00393213
LOC103988743	-4.25783	3.55178	6.97289e-05	0.00396072
LOC103993226	3.04919	3.68812	7.05306e-05	0.00399824
LOC103969146	2.4647	5.21897	7.11284e-05	0.00401999
LOC103983986	2.50813	4.25475	7.11979e-05	0.00401999
LOC103972669	2.47078	6.25966	7.22322e-05	0.00406834
LOC103996822	3.90378	2.65743	7.23413e-05	0.00406834
LOC103993920	2.27936	3.15069	7.25325e-05	0.00407101
LOC103986901	2.49584	4.73363	7.34516e-05	0.00411445
LOC103999272	3.95074	1.1165	7.39873e-05	0.00413628
LOC103995332	2.07847	4.25713	7.41936e-05	0.00413965
LOC103987715	-2.52281	6.9111	7.46028e-05	0.00415319
LOC103996253	-1.73449	7.63325	7.47292e-05	0.00415319
LOC103984996	1.80907	3.5608	7.52744e-05	0.00417481
LOC103993314	2.69124	2.10251	7.5413e-05	0.00417481
LOC103980148	2.03694	7.15204	7.80639e-05	0.00431314
LOC103971078	3.86205	6.57545	7.98308e-05	0.00440219
LOC103975910	2.23474	7.94068	8.03095e-05	0.00441999
LOC103994146	2.93134	2.2272	8.07111e-05	0.00443348
LOC103974388	2.89033	2.94292	8.1952e-05	0.00449294
LOC103992536	2.35659	7.5773	8.28493e-05	0.00453336
LOC103995301	-1.2801	4.69444	8.8008e-05	0.00480635
LOC103981010	1.49815	4.82477	9.06501e-05	0.00494113
LOC103994685	1.74791	8.08444	9.11978e-05	0.00495231
LOC103978378	2.76897	2.93978	9.12048e-05	0.00495231
LOC103971621	-2.29204	5.11334	9.13984e-05	0.00495334
LOC103968413	-2.75033	3.43628	9.29311e-05	0.00502679
LOC103989656	2.4704	8.12541	9.32175e-05	0.00503268
LOC103993939	2.14168	7.59124	9.37586e-05	0.00505227
LOC103969635	-2.5693	7.87963	9.50138e-05	0.00511019
LOC103986793	-1.8694	7.33146	9.55544e-05	0.00512953
LOC103977770	2.18043	4.42018	9.74092e-05	0.00521922
LOC103977230	-1.52183	5.37147	9.82414e-05	0.00525388
LOC103977104	2.27841	3.09856	9.8934e-05	0.00528095
LOC103981759	1.74762	4.47751	9.93119e-05	0.00529116
LOC103985709	-3.78057	3.42921	9.97465e-05	0.00530434
LOC103996223	-2.82067	4.46694	0.000100066	0.00531137
LOC103969614	-1.8469	3.71554	0.000101352	0.00536957
LOC103987834	-1.80941	3.23162	0.000101939	0.00539061
LOC103976605	-2.68019	6.58003	0.000103297	0.00545223
LOC103970583	-1.55229	4.52923	0.00010375	0.00546319
LOC103971996	-4.83189	1.11565	0.000103959	0.00546319
LOC103973055	-1.57977	5.09795	0.000104083	0.00546319
LOC103989206	-1.63598	4.72797	0.000107105	0.00561141
LOC103989175	-1.22129	5.34875	0.000107733	0.00563097
LOC103982473	1.54159	3.79513	0.000107875	0.00563097
LOC103997881	2.47185	7.41118	0.000109558	0.00570832
LOC104001037	2.73144	10.2583	0.000110974	0.00577147
LOC103984498	2.40184	5.23382	0.000111504	0.00578839
LOC103986573	1.67343	3.62506	0.000112534	0.0058312
LOC103992069	-1.73485	5.00288	0.000114036	0.00589825
LOC103988578	1.83713	9.02715	0.000115	0.00593725
LOC103987527	2.62734	5.81144	0.000115276	0.0059407
LOC103972319	-1.20625	7.2303	0.000115603	0.00594673
LOC103971263	-1.49202	4.54471	0.000117135	0.00601464
LOC103970390	2.37449	4.67438	0.000118344	0.00606573
LOC103993671	1.08251	6.05842	0.000118799	0.00607807
LOC103997540	1.65001	4.03834	0.000119017	0.00607825
LOC103985947	-2.59235	3.98735	0.000120288	0.00613208
LOC103977163	1.751	6.58633	0.000121254	0.00617025
LOC103975682	-1.41977	6.819	0.00012155	0.00617422
LOC103997310	-1.54836	5.98857	0.000121994	0.00618569
LOC103984981	-1.97229	4.05107	0.000123011	0.00621098
LOC103992187	3.13604	2.87506	0.000123098	0.00621098
LOC103971145	3.20782	2.06617	0.00012315	0.00621098
LOC103990759	2.34985	7.43275	0.000125783	0.00633251
LOC103996088	1.7087	6.38455	0.000127007	0.00638278
LOC103986762	-2.18594	2.83503	0.000128046	0.00641537
LOC103981200	-1.03984	6.12255	0.000128108	0.00641537
LOC103983136	3.42485	5.38963	0.00012922	0.00645964
LOC103995303	5.16987	2.54249	0.000131318	0.00655293
LOC103991501	-5.38663	2.88633	0.000131636	0.00655728
LOC103989221	4.18491	6.18147	0.000133117	0.00661942
LOC103969451	3.56642	3.93419	0.000134068	0.00665502
LOC103988575	2.4698	5.29426	0.000138545	0.00686524
LOC103977778	-1.50506	4.53801	0.000139147	0.00688307
LOC103988937	-2.01026	7.59784	0.000139806	0.00690358
LOC103973427	-2.03702	7.36608	0.000141333	0.00696546
LOC103979874	3.1768	3.96521	0.000141649	0.00696546
LOC103973140	1.88215	4.68815	0.000141796	0.00696546
LOC103990113	2.01758	3.05478	0.000142118	0.00696921
LOC103998725	3.13956	5.638	0.000142903	0.00699559
LOC103980637	3.43134	2.43635	0.000144156	0.00704474
LOC103995574	2.13797	10.8618	0.00014573	0.0071094
LOC103985241	7.68387	0.896796	0.00014685	0.00715172
LOC103991346	-1.26025	8.14556	0.000148021	0.00718656
LOC103978985	2.90974	5.13551	0.000148072	0.00718656
LOC103975985	1.98166	4.86339	0.000148355	0.00718798
LOC103989283	2.4424	3.63447	0.000149219	0.00720541
LOC103987115	-2.41862	2.49575	0.000149223	0.00720541
LOC103979428	-1.67595	7.59966	0.000149499	0.00720646
LOC103973211	2.7125	4.82355	0.000150282	0.00722994
LOC103979906	2.79763	6.6386	0.000150496	0.00722994
LOC103993219	3.16728	3.12183	0.000151787	0.0072796
LOC103987818	1.28408	6.0043	0.000152225	0.00728826
LOC103982437	1.51281	4.63626	0.000152661	0.00729683
LOC103995740	1.3101	6.71752	0.000153123	0.00730662
LOC103983920	-2.37253	3.08716	0.000154696	0.00736925
LOC103979920	2.87129	7.74058	0.000156119	0.00742447
LOC103991960	-2.66784	5.10857	0.000156413	0.00742447
LOC103992806	-1.27485	4.99879	0.000156641	0.00742447
LOC103992568	1.44579	3.73741	0.000157842	0.00746889
LOC103989628	1.78619	5.40103	0.000159003	0.00751129
LOC103991283	-1.56898	6.91398	0.000159794	0.00753612
LOC103994990	-2.15701	5.64632	0.000160528	0.00755751
LOC103996899	1.91809	3.59183	0.000160781	0.00755751
LOC103972334	1.37097	4.74628	0.000162096	0.00760669
LOC103992167	-3.11149	7.49469	0.000162373	0.0076071
LOC103993496	2.95865	2.55752	0.000163673	0.00765535
LOC103968681	-3.36672	1.37429	0.000164058	0.00766073
LOC103969097	-1.30045	3.87639	0.000166075	0.00774218
LOC103984099	3.4809	6.03512	0.000167304	0.00778666
LOC103969136	2.2624	4.94522	0.00016765	0.00778995
LOC103993786	1.51475	3.87537	0.000168363	0.00780493
LOC103986844	7.28557	1.75409	0.000168523	0.00780493
LOC103993193	-2.80489	4.93538	0.000169274	0.00782691
LOC103987810	3.64784	1.46716	0.000172193	0.00794892
LOC104000920	3.35335	4.63	0.000172894	0.00796831
LOC103987535	1.88022	3.98726	0.000173718	0.00799328
LOC103999733	-3.6508	3.1135	0.000174137	0.0079996
LOC103999905	4.4597	5.14496	0.000177268	0.00810679
LOC103987768	2.96225	3.75368	0.000177546	0.00810679
LOC104000304	-2.63262	6.1662	0.000177719	0.00810679
LOC103982802	-2.38411	8.28246	0.000177871	0.00810679
LOC103999555	4.04382	2.09292	0.000177901	0.00810679
LOC103968354	6.48173	0.843044	0.000182338	0.00829565
LOC103997744	3.75213	3.01842	0.000183924	0.00835441
LOC103997602	1.14861	6.27161	0.000186903	0.00847613
LOC103969811	-2.65467	0.976939	0.00019271	0.0087255
LOC103981925	2.14831	4.07319	0.000193186	0.00873314
LOC103977159	-7.82352	-0.362424	0.000193549	0.00873558
LOC103973550	-2.15904	5.91826	0.00019478	0.00877717
LOC103978794	-3.26981	8.21992	0.000195251	0.00878446
LOC103997261	2.64427	5.21989	0.00019633	0.008819
LOC103986381	7.35617	-0.171422	0.000199918	0.00896595
LOC103991729	1.08741	6.19949	0.000201677	0.00903053
LOC103969411	1.94865	4.46555	0.000202854	0.00906892
LOC103974037	2.03555	6.65498	0.000204047	0.00910308
LOC104000030	4.03623	1.02678	0.000204261	0.00910308
LOC103983591	-2.7206	4.80409	0.000204998	0.00912161
LOC103981309	1.10744	5.07569	0.000208836	0.00927783
LOC103986087	2.38052	3.94472	0.000209757	0.00930413
LOC103982392	2.20145	4.2616	0.000214706	0.00950879
LOC103990092	-1.75856	3.9448	0.000215308	0.00951034
LOC103971401	-1.84587	3.68486	0.000215412	0.00951034
LOC103989523	-4.37463	2.81228	0.000219905	0.00969361
LOC103989489	3.37284	7.29287	0.000222298	0.00978387
LOC103996856	-2.15124	4.70037	0.00022351	0.00982198
LOC103991700	-1.74963	5.49785	0.000231502	0.0101574
LOC103986790	-1.84516	4.65543	0.000232436	0.0101826
LOC103972000	1.87903	8.0438	0.000234963	0.0102774
LOC103989841	3.86845	1.89528	0.000235442	0.0102825
LOC103968897	2.00881	4.56138	0.000236813	0.0103124
LOC103992107	2.35367	2.73832	0.000237116	0.0103124
LOC103982399	-1.85407	8.87627	0.000237218	0.0103124
LOC103984717	-1.91941	5.11205	0.000239103	0.0103533
LOC103996818	2.4368	4.58102	0.000239106	0.0103533
LOC103998683	1.70259	7.16568	0.000239253	0.0103533
LOC103975825	2.13101	3.72415	0.000241298	0.0104258
LOC103999177	2.91394	5.23956	0.000247568	0.0106645
LOC103996881	2.16422	6.55777	0.000247573	0.0106645
LOC103971909	3.23143	3.40986	0.00024873	0.0106932
LOC103968995	-2.58896	5.94989	0.000248995	0.0106932
LOC103999481	-4.79544	3.51935	0.000251114	0.0107679
LOC103995799	2.02511	5.16205	0.000251751	0.0107758
LOC103996389	1.8731	7.04257	0.000252058	0.0107758
LOC103985441	-2.48522	4.77655	0.000254189	0.0108505
LOC103995680	3.30343	3.10009	0.000255934	0.0109086
LOC103976586	-3.54262	6.34779	0.000259747	0.0110392
LOC103982953	1.99535	3.70511	0.000259779	0.0110392
LOC103981843	-1.65882	9.46132	0.000261415	0.0110921
LOC103982311	-1.64706	6.16034	0.000262783	0.0111335
LOC103973487	1.41879	3.46705	0.000266778	0.0112859
LOC103973555	1.36615	4.7696	0.000268108	0.0113063
LOC103989382	1.92404	4.50929	0.000268907	0.0113063
LOC103969478	1.42495	5.54855	0.000268987	0.0113063
LOC103995323	1.48903	4.04105	0.000269183	0.0113063
LOC103974724	-5.52836	0.747973	0.000269255	0.0113063
LOC103983655	2.93054	1.756	0.000270301	0.0113335
LOC103988079	2.30618	3.50485	0.000272057	0.0113902
LOC104000805	2.03015	4.8171	0.000275014	0.011497
LOC103984773	1.65229	5.53161	0.000277386	0.0115791
LOC103995029	-1.5502	5.45258	0.000282845	0.0117896
LOC103993110	-1.38103	9.39898	0.000285691	0.0118864
LOC103991366	-3.47272	3.82593	0.000286005	0.0118864
LOC103985740	1.69305	4.17883	0.000288184	0.0119594
LOC103984468	1.50946	3.21271	0.000289936	0.0120145
LOC103977706	2.1682	4.36737	0.000291847	0.0120761
LOC103992006	1.61999	5.95071	0.000292608	0.0120899
LOC103985191	-3.58863	2.84779	0.000293997	0.0121227
LOC103999794	1.68726	5.98719	0.000294571	0.0121227
LOC103983558	-2.03877	3.8841	0.000294684	0.0121227
LOC103987630	1.81899	3.32361	0.00029962	0.0123079
LOC103982532	3.03258	3.16689	0.00030056	0.0123286
LOC103976880	2.00661	7.84358	0.00030412	0.0124566
LOC103995540	-1.33843	4.76209	0.000305285	0.0124863
LOC103969205	-3.15267	1.66085	0.000305833	0.0124907
LOC103988927	-1.51771	5.70989	0.00031088	0.0126785
LOC103974515	-1.77895	4.47126	0.000311836	0.0126992
LOC103974539	-1.44916	3.72855	0.000314036	0.0127705
LOC103978375	-1.84909	5.65341	0.000314713	0.0127797
LOC103982521	-4.64121	0.834285	0.000315825	0.012786
LOC103988593	1.29021	4.57595	0.000316044	0.012786
LOC103989913	2.58727	4.9116	0.000316221	0.012786
LOC103987519	-2.89581	7.98441	0.000316964	0.0127978
LOC103993979	1.5773	5.28001	0.000318059	0.0128237
LOC103975153	-1.97192	3.29977	0.000318792	0.0128299
LOC103974029	-1.16914	4.45905	0.000319117	0.0128299
LOC103987432	-2.2864	3.08422	0.000322809	0.012927
LOC103991406	1.63416	4.01542	0.000322861	0.012927
LOC103995847	1.65884	5.46324	0.0003229	0.012927
LOC103985511	1.47061	4.48048	0.000326665	0.0130467
LOC103990131	2.48549	3.96442	0.000326812	0.0130467
LOC103998352	2.40649	4.41981	0.000329801	0.0131374
LOC103969401	-1.97713	4.11663	0.00033001	0.0131374
LOC103970084	-7.45618	-1.2329	0.000331167	0.0131533
LOC103998017	-2.4351	2.64294	0.000331338	0.0131533
LOC103982536	1.46122	4.4424	0.000334183	0.0132477
LOC103993598	2.1867	5.84145	0.000336026	0.0133021
LOC103972564	2.85976	2.91273	0.00033756	0.0133442
LOC103973880	1.41452	5.62795	0.000341056	0.0134636
LOC103974146	6.59049	-0.203456	0.000342278	0.0134931
LOC103976910	-2.12502	5.98094	0.000343258	0.0135129
LOC103969076	1.30411	4.38976	0.00034665	0.0136275
LOC103987507	2.50059	4.04112	0.000347871	0.0136505
LOC103995299	-2.78248	5.22946	0.000348198	0.0136505
LOC103999586	3.63324	1.71236	0.000349654	0.0136887
LOC103999741	1.87456	4.43987	0.000355963	0.0139164
LOC103974563	2.42409	5.48699	0.000358961	0.0140143
LOC103998362	1.91479	4.74569	0.000362107	0.0141177
LOC103993418	1.76209	5.80705	0.000364534	0.0141928
LOC103981620	1.6718	3.76267	0.000366097	0.014228
LOC103995831	2.88149	4.10713	0.000366443	0.014228
LOC103990318	1.844	4.43139	0.000372136	0.0144293
LOC103993650	2.26404	9.00305	0.00037284	0.0144369
LOC103978933	1.50496	3.44963	0.000376012	0.0145398
LOC103993208	2.60473	5.3413	0.000377697	0.0145851
LOC103997077	-1.31379	5.17631	0.00037927	0.0146259
LOC103980893	2.68662	10.5088	0.000379999	0.0146341
LOC103987057	2.02708	5.6356	0.000384641	0.0147928
LOC103971203	5.04327	2.68339	0.000385545	0.0148074
LOC103994715	-1.48446	4.82799	0.000394643	0.0151363
LOC103972271	2.26128	1.4722	0.000396034	0.0151682
LOC103993362	-2.47576	6.67823	0.000396543	0.0151682
LOC103985993	-3.44446	4.51351	0.000397388	0.01518
LOC103991388	-1.43379	6.51674	0.000399356	0.0152347
LOC103970294	2.1053	6.31272	0.000401603	0.0152998
LOC104000931	1.01689	5.85868	0.000403829	0.0153639
LOC103972919	1.6332	5.014	0.000404797	0.0153801
LOC103987161	4.69149	2.72033	0.000405773	0.0153966
LOC103988016	-1.36679	5.74464	0.000412683	0.0156378
LOC103982337	-1.71136	8.93799	0.00041486	0.0156993
LOC104000137	2.62361	7.30459	0.000418803	0.0158274
LOC103968923	2.1966	2.9856	0.000419869	0.0158466
LOC103998693	2.55901	4.01002	0.000425489	0.0160373
LOC103983555	2.48956	3.6275	0.000426228	0.0160438
LOC103972349	2.79459	2.42955	0.000428158	0.0160951
LOC103978143	1.34909	4.43014	0.000429216	0.0161045
LOC103968499	-1.34248	7.38191	0.000429544	0.0161045
LOC103988708	-2.42582	6.01416	0.000431112	0.0161419
LOC103978170	-1.63007	5.6939	0.00043203	0.0161522
LOC103993647	-1.09172	4.88766	0.000432526	0.0161522
LOC103981365	1.20728	5.73524	0.000435236	0.016232
LOC103973170	2.19049	6.99926	0.000435825	0.0162326
LOC103986543	1.18107	6.3507	0.000438773	0.016321
LOC103979030	3.19115	1.71082	0.000439411	0.0163233
LOC103982255	2.05787	7.6006	0.000442527	0.0163994
LOC103972966	-3.34814	0.918303	0.000442617	0.0163994
LOC103974136	-2.3345	5.8812	0.000444181	0.0164308
LOC103981459	2.36739	3.27277	0.000444623	0.0164308
LOC103995240	-3.50307	0.469892	0.000445477	0.0164405
LOC103996800	1.82087	3.56728	0.000446048	0.0164405
LOC103991371	2.26059	6.57641	0.000449305	0.0165391
LOC103991617	2.46235	2.7181	0.000451316	0.0165916
LOC103987747	2.53729	4.38297	0.000455669	0.0167299
LOC104000733	-2.2279	3.36211	0.000458795	0.0167917
LOC103977071	-2.23434	2.98293	0.000458927	0.0167917
LOC103976936	2.63805	4.80943	0.000459131	0.0167917
LOC103980966	-1.51884	5.48667	0.000467929	0.0170915
LOC103998358	4.24892	0.782755	0.000469484	0.0171262
LOC103984639	3.01918	1.44224	0.000472523	0.0172149
LOC103980929	-1.87244	4.66345	0.000477762	0.0173834
LOC103985778	1.61578	4.8547	0.000480057	0.0174357
LOC104000647	2.27719	2.73381	0.00048043	0.0174357
LOC103987496	-2.01029	6.95856	0.000481441	0.0174434
LOC103987655	3.47693	4.68653	0.000481882	0.0174434
LOC103998201	1.29342	3.67211	0.000482489	0.0174434
LOC103998733	-2.09652	5.15284	0.000484201	0.0174831
LOC103998875	-1.70323	4.11258	0.000485365	0.0175028
LOC104000844	-1.64808	5.32783	0.000486945	0.0175375
LOC103993951	-1.83484	4.03837	0.000490276	0.017635
LOC103972102	2.41459	5.12985	0.000490957	0.0176371
LOC103983943	1.42035	6.9353	0.000492981	0.0176874
LOC103969254	1.15719	5.01053	0.000494902	0.0177122
LOC103986721	-2.24214	4.07663	0.000494921	0.0177122
LOC103976700	-1.0368	6.65014	0.000497534	0.0177832
LOC103996797	-1.74208	3.64771	0.000500626	0.0178712
LOC103972741	-2.89506	5.74151	0.000506696	0.0180652
LOC103985554	1.31495	5.41045	0.000508386	0.0180944
LOC103984510	-1.95373	5.17803	0.000509374	0.0180944
LOC103981216	1.76542	5.61569	0.000509431	0.0180944
LOC103989710	1.92353	4.16065	0.00051334	0.0182022
LOC103974773	-3.96004	5.19926	0.000513751	0.0182022
LOC103983598	-2.01723	5.85479	0.000515092	0.0182269
LOC103983883	-1.25903	4.30399	0.000517082	0.0182626
LOC103996510	1.49231	5.89498	0.00051739	0.0182626
LOC103986709	1.32042	6.61729	0.00052195	0.0184007
LOC103978197	-9.04824	1.89818	0.00052441	0.0184644
LOC103991319	3.12191	3.68705	0.00053058	0.0186585
LOC103979557	4.9678	0.789221	0.00053372	0.0187457
LOC103982242	-1.3091	7.38016	0.000535459	0.0187835
LOC103982291	2.8149	4.4996	0.000540337	0.0189312
LOC103990325	1.99011	5.61294	0.000542282	0.0189758
LOC103978249	2.2983	7.22569	0.000544524	0.0190308
LOC103998502	-1.65158	4.01732	0.00054554	0.0190428
LOC103992009	1.30048	2.68779	0.000548469	0.0191215
LOC103993858	-1.84349	5.86691	0.000552121	0.019219
LOC103985626	2.70257	2.58231	0.00055262	0.019219
LOC103977085	-1.77353	6.70393	0.000556697	0.019337
LOC103986237	1.5396	5.28156	0.000560691	0.0194519
LOC103983011	1.21621	6.06028	0.000561379	0.019452
LOC103979212	1.35633	4.61996	0.000562796	0.0194773
LOC103994561	2.79381	3.04938	0.000564614	0.0195164
LOC103977472	-2.42977	3.38215	0.000568164	0.0196151
LOC103991322	-1.33187	6.236	0.0005726	0.0197442
LOC103987037	-7.4533	-0.0656238	0.000573982	0.0197679
LOC103999299	1.19682	5.24573	0.00057691	0.0198446
LOC103975649	2.8551	7.11703	0.000578956	0.0198873
LOC103997884	1.93593	6.46215	0.000579556	0.0198873
LOC103999922	-1.74042	5.99839	0.000584043	0.0200171
LOC103976866	-1.6871	6.90356	0.000587186	0.0201005
LOC103971640	1.52829	3.55388	0.000593115	0.0202633
LOC103974645	-3.02481	2.75651	0.000593373	0.0202633
LOC103986620	2.22281	1.86467	0.00059603	0.0203277
LOC103984509	-2.60553	5.58423	0.000596693	0.0203277
LOC103992750	-2.63434	3.4939	0.000599743	0.0203927
LOC103987415	1.60965	5.02069	0.00060004	0.0203927
LOC103977835	1.43026	5.43703	0.000602914	0.0204605
LOC103983043	-2.21584	2.81201	0.000604043	0.0204605
LOC103971926	-2.37396	8.82149	0.000604758	0.0204605
LOC103983189	1.84619	5.04881	0.000604921	0.0204605
LOC103989418	2.99812	4.95653	0.000607209	0.0205134
LOC103976067	1.64105	4.90192	0.00060922	0.0205568
LOC103987503	2.24895	4.24974	0.00061333	0.0206709
LOC104000651	-1.2781	5.19632	0.000617143	0.0207504
LOC103990082	-1.55551	9.13052	0.000617155	0.0207504
LOC103974205	5.02105	6.52781	0.000624461	0.0209712
LOC103969489	2.28017	6.30541	0.000625439	0.0209792
LOC103986626	2.32873	4.18248	0.000633123	0.0211624
LOC103969564	1.61141	3.02846	0.000633158	0.0211624
LOC103993551	-2.47901	7.54191	0.000634344	0.0211624
LOC103970775	-1.41389	4.80508	0.000634607	0.0211624
LOC103983455	-2.72088	2.5369	0.000634783	0.0211624
LOC103995451	-1.30128	5.9138	0.000635471	0.0211624
LOC103972122	-2.86095	0.971904	0.000636463	0.0211624
LOC104000818	-2.4661	5.74928	0.000636873	0.0211624
LOC103969199	-3.06725	8.52313	0.000640654	0.0212631
LOC103996934	-2.07437	4.95887	0.000645152	0.0213873
LOC104000155	-1.27303	5.46744	0.000645942	0.0213885
LOC103974855	2.74541	4.741	0.000646876	0.0213945
LOC103984866	1.48837	6.02096	0.000648035	0.0214078
LOC103986617	1.59284	4.7626	0.000649563	0.0214149
LOC103978768	-1.25819	3.39351	0.00064976	0.0214149
LOC103995030	1.69784	2.79937	0.000651504	0.0214371
LOC103997992	2.03275	3.54773	0.000652521	0.0214371
LOC103999747	2.458	3.96351	0.000652704	0.0214371
LOC103978415	-7.44546	-0.737514	0.000654141	0.0214595
LOC103983583	-2.49441	1.94326	0.000657216	0.0215354
LOC103971017	-1.36826	4.24037	0.000659325	0.0215796
LOC103994298	1.71413	6.51767	0.000661292	0.0215948
LOC103969972	5.1678	2.37996	0.000661701	0.0215948
LOC103977146	2.57324	7.00624	0.000662077	0.0215948
LOC103973792	1.74134	4.91068	0.000665462	0.0216803
LOC103984056	2.53886	6.45117	0.000668962	0.0217693
LOC103970064	1.71315	8.84739	0.000670372	0.0217902
LOC103971762	-1.38986	3.96858	0.000672415	0.0218315
LOC103995818	-1.50483	3.5769	0.000675006	0.0218906
LOC103996619	2.07121	3.76299	0.000680688	0.0220496
LOC103972950	-1.97081	1.72382	0.000684344	0.0221428
LOC103970289	3.25203	2.01665	0.000686692	0.0221787
LOC103992286	1.84703	5.09121	0.000687019	0.0221787
LOC104000097	-1.39785	3.60651	0.000688842	0.0222122
LOC103991351	-1.4387	4.1925	0.000692025	0.0222895
LOC103974505	-1.77164	4.89389	0.000693478	0.0223109
LOC103994750	5.03703	1.55772	0.000696427	0.022358
LOC103994872	2.00292	2.88369	0.000696519	0.022358
LOC103985513	-1.17535	5.46337	0.000704641	0.0225931
LOC103988895	2.28163	3.28568	0.000705854	0.0226065
LOC103985317	1.34004	7.34436	0.000709895	0.0227102
LOC103974011	1.96207	3.0972	0.000711537	0.0227186
LOC103994095	-1.19534	8.60462	0.000711761	0.0227186
LOC103984756	-2.69705	3.65594	0.000721416	0.0230009
LOC103992211	-7.88649	0.0524823	0.000723818	0.0230516
LOC103999180	-1.30587	4.70225	0.000726177	0.0230973
LOC103995391	1.4015	4.55833	0.000726883	0.0230973
LOC103985006	2.29056	3.10494	0.000733125	0.0232695
LOC103990757	-1.54048	6.20594	0.000734508	0.0232874
LOC103970515	-3.47197	1.65297	0.000737159	0.0233172
LOC103988336	-2.06023	4.16655	0.000737614	0.0233172
LOC103977534	2.27106	1.81222	0.000737916	0.0233172
LOC103995597	-2.78158	2.31257	0.000740563	0.0233416
LOC103984250	3.524	2.60393	0.000740701	0.0233416
LOC103998902	-1.97761	5.7963	0.000741161	0.0233416
LOC103978409	2.3436	2.64455	0.000745655	0.0234571
LOC103968540	1.28544	3.75541	0.000750964	0.0235923
LOC103982019	-2.45307	2.48369	0.000751618	0.0235923
LOC103969395	2.1694	7.06185	0.000755814	0.0236978
LOC103977734	1.61752	4.68149	0.000757752	0.0237323
LOC103989222	3.55211	0.654492	0.000759571	0.023763
LOC103986097	-1.47199	4.48244	0.000763414	0.0238316
LOC103990319	1.58474	4.57177	0.000763446	0.0238316
LOC103990174	3.23318	2.48326	0.000765652	0.0238742
LOC103976058	1.37718	4.91577	0.000767086	0.0238926
LOC103968609	1.99862	5.60873	0.000770203	0.0239634
LOC103989287	1.61961	4.88316	0.000774872	0.0240822
LOC103998120	3.28093	0.507037	0.000775983	0.0240903
LOC103998625	-1.40434	7.25444	0.000778486	0.0241416
LOC103999102	-2.5283	4.81118	0.000782721	0.0242464
LOC103972125	2.39757	1.48911	0.000795248	0.0245841
LOC104000795	2.38712	5.97759	0.000795359	0.0245841
LOC103990047	2.04751	3.84034	0.000796319	0.024585
LOC103984666	2.07266	5.37803	0.000797122	0.024585
LOC103974684	-1.03197	6.46705	0.000803157	0.0247442
LOC103979752	1.46198	4.11628	0.000804329	0.0247534
LOC103999470	-1.31775	4.66512	0.000808477	0.0248288
LOC103974632	2.33048	5.82321	0.000808837	0.0248288
LOC103976748	-2.63246	0.508328	0.000809408	0.0248288
LOC103988646	3.41129	1.375	0.000811855	0.024877
LOC103999797	1.49669	4.59857	0.000813394	0.0248972
LOC103996047	-2.18716	2.49525	0.000814347	0.0248995
LOC103990563	1.14744	5.18061	0.00081527	0.0249009
LOC103991199	3.20333	1.96583	0.000816485	0.0249112
LOC103974634	1.72177	6.4079	0.000822681	0.0250427
LOC103986975	-1.43329	6.42841	0.000823141	0.0250427
LOC103973202	-8.21745	0.701391	0.000823446	0.0250427
LOC103977847	1.94868	4.88487	0.000839403	0.0254901
LOC103979292	1.59597	3.15636	0.000839958	0.0254901
LOC103979966	-2.26027	3.21153	0.000842532	0.0255409
LOC103979821	2.67071	3.33668	0.000843642	0.0255472
LOC103974412	1.10699	6.17842	0.000849844	0.0257076
LOC103968806	1.72871	2.59962	0.000851849	0.0257407
LOC103974605	2.21453	2.31632	0.000853204	0.0257542
LOC103973941	1.90277	7.87411	0.000862814	0.0260166
LOC103970991	2.05714	2.10076	0.000865989	0.0260846
LOC103986011	-1.19871	5.29755	0.000869965	0.0261765
LOC103982699	1.70422	4.16179	0.000884567	0.0265877
LOC103984755	-3.16629	4.82957	0.000890475	0.0267369
LOC103977990	-1.72455	4.96938	0.00089381	0.0268086
LOC103978156	3.5423	7.83696	0.000895791	0.0268396
LOC103971608	-2.10442	4.75922	0.000898373	0.0268728
LOC103972257	1.38006	2.93594	0.000898794	0.0268728
LOC103996809	2.19453	3.168	0.000919668	0.0274679
LOC103986711	-1.94944	9.89281	0.000927145	0.0276518
LOC103982217	2.41851	2.49435	0.000927774	0.0276518
LOC103968395	-2.14217	7.07325	0.00092893	0.0276571
LOC103978149	0.994101	6.72983	0.000937168	0.0278731
LOC103995379	-4.123	0.424278	0.000939736	0.0279034
LOC103998877	-1.61876	5.98652	0.000940155	0.0279034
LOC103986675	-1.59549	5.42909	0.000941636	0.0279181
LOC103984744	2.66472	8.83755	0.000950197	0.0281116
LOC103978970	1.27453	3.26938	0.000950257	0.0281116
LOC103990359	-2.03425	3.6958	0.000951138	0.0281116
LOC103979674	1.06234	4.66899	0.000956561	0.0282425
LOC103998710	-1.32266	4.21911	0.000958974	0.0282842
LOC104000725	3.38321	2.51811	0.00096251	0.028359
LOC103997404	-3.06201	3.07849	0.000965852	0.0283722
LOC103983052	-1.33094	7.43649	0.000966446	0.0283722
LOC103984658	2.99141	2.28117	0.000967524	0.0283722
LOC103982195	-1.45965	3.10188	0.000967909	0.0283722
LOC103988759	-2.86077	5.6925	0.000967962	0.0283722
LOC103984472	-1.26704	5.14827	0.00096914	0.0283774
LOC103997829	1.42487	5.43516	0.000978298	0.0286058
LOC103994696	3.46982	1.34038	0.000978958	0.0286058
LOC103988698	1.21518	5.42314	0.000984619	0.0287014
LOC104000506	1.24041	4.78137	0.000984742	0.0287014
LOC103970654	-2.08862	7.67808	0.00098527	0.0287014
LOC103985200	-2.152	4.38673	0.000989499	0.0287866
LOC103979211	-1.30355	4.75956	0.000990224	0.0287866
LOC103983698	-2.37513	7.28163	0.000992356	0.028819
LOC103981104	-1.15571	7.71538	0.000996376	0.0289061
LOC103991410	1.00337	5.08091	0.00100094	0.0290088
LOC103997640	-1.80719	5.12461	0.00100257	0.0290265
LOC103988342	2.85109	2.72	0.00101319	0.029304
LOC103999540	1.45989	6.14062	0.00102854	0.0297177
LOC103982338	1.89448	4.84673	0.0010299	0.0297264
LOC103976195	-1.81929	0.760876	0.00103442	0.0298266
LOC103979306	6.92502	-0.576132	0.0010358	0.0298361
LOC103972730	-2.19783	3.71884	0.00105128	0.0302513
LOC103987962	2.8567	3.29934	0.0010542	0.0303045
LOC103993105	1.40356	6.6129	0.00105969	0.0304314
LOC103980786	2.43317	5.13344	0.00106218	0.030472
LOC103973536	3.18288	6.67713	0.00106904	0.0306378
LOC103997190	1.63849	4.39237	0.00107997	0.0308943
LOC103996756	2.37433	3.92715	0.00108017	0.0308943
LOC103976919	-2.23415	2.19835	0.00108627	0.0310374
LOC103968458	3.26185	4.43931	0.00109713	0.0313164
LOC103976280	3.44039	2.74375	0.00109981	0.0313327
LOC103993560	1.41554	3.83526	0.00109992	0.0313327
LOC103995088	-3.45903	1.6256	0.00110495	0.0314445
LOC103995819	-1.4282	6.64701	0.00110861	0.0315169
LOC103999312	-1.30727	6.09195	0.0011214	0.0318486
LOC103981754	2.68984	4.41876	0.00113191	0.0320943
LOC103983850	-1.54649	3.20287	0.00113361	0.0320943
LOC103968625	5.8347	1.52365	0.00113478	0.0320943
LOC103969164	-1.49618	5.01959	0.00113504	0.0320943
LOC103981359	-2.07945	4.97164	0.00113571	0.0320943
LOC103983697	-1.19124	7.12465	0.00114261	0.0322511
LOC103999910	-1.2287	5.05211	0.00114353	0.0322511
LOC103994463	1.28229	6.4403	0.00115088	0.032426
LOC103979331	-1.56928	7.3357	0.00115322	0.0324596
LOC103984169	2.64951	4.74894	0.00115548	0.0324909
LOC103986274	1.04821	4.05772	0.00115708	0.0325038
LOC103976161	-2.20934	4.20006	0.00116136	0.0325918
LOC103968575	-1.29231	4.69487	0.001164	0.0326325
LOC103991728	1.345	6.57131	0.00116512	0.0326325
LOC103976739	2.2397	4.71464	0.00117782	0.0329553
LOC103968769	1.55894	3.86527	0.00117897	0.0329553
LOC103983600	-1.03395	5.83081	0.00118895	0.0332006
LOC103974335	1.05759	4.34883	0.00119009	0.0332006
LOC103999610	-1.80121	3.54139	0.00119268	0.0332402
LOC103989568	-1.8095	3.12377	0.0011985	0.0333696
LOC103969329	2.07015	4.58408	0.00119982	0.0333735
LOC103975375	1.43479	5.06863	0.00120271	0.0333895
LOC103972920	1.44568	2.51434	0.00120275	0.0333895
LOC103996187	-2.74829	7.7657	0.00120688	0.0334714
LOC103995749	-1.72548	1.95833	0.0012112	0.0335583
LOC103983777	-2.60247	1.85704	0.00121798	0.0336894
LOC103999590	2.18954	2.33891	0.0012183	0.0336894
LOC103972868	1.51972	6.40259	0.0012266	0.0338858
LOC103998630	1.71082	8.95689	0.00123364	0.0340445
LOC103981689	-2.69013	2.53322	0.00123475	0.0340445
LOC103992692	2.55621	1.85698	0.00124253	0.0342258
LOC103994970	2.17829	1.52532	0.00124817	0.0343478
LOC103996618	2.17375	3.02087	0.00125384	0.0344703
LOC103980421	1.58019	7.04984	0.00125717	0.0345285
LOC103973443	1.68632	2.71938	0.00126126	0.0346066
LOC103979551	2.28541	4.564	0.00126246	0.0346066
LOC103977073	2.10773	8.46432	0.00126896	0.0347512
LOC103979167	2.18178	5.04958	0.00127963	0.0349412
LOC103990260	1.95841	6.15722	0.00127975	0.0349412
LOC103991622	-1.55976	3.91962	0.0012814	0.0349412
LOC103988703	-1.99437	1.36521	0.00128221	0.0349412
LOC103981960	1.15179	4.26281	0.0012844	0.0349412
LOC103988028	1.83369	7.63654	0.0012844	0.0349412
LOC103973794	1.58507	3.45995	0.00128453	0.0349412
LOC103973684	5.15024	0.740125	0.00129062	0.0350559
LOC103977123	-1.60665	6.42313	0.00129122	0.0350559
LOC103988136	-1.25948	7.87349	0.00129355	0.0350855
LOC103970206	1.77246	3.91248	0.00129724	0.0351519
LOC103980631	-3.33741	-0.128504	0.0013015	0.0352169
LOC103995598	-2.766	8.4366	0.00130212	0.0352169
LOC103972625	-2.43275	0.955792	0.00130814	0.0353458
LOC103980844	-2.70015	1.88409	0.00131211	0.0354193
LOC103981350	-1.70875	1.46429	0.00131955	0.0355865
LOC103998089	1.89556	6.44297	0.00133214	0.0358918
LOC103999315	1.90056	6.27733	0.00133458	0.0359234
LOC103998407	2.14686	3.24623	0.00134238	0.036099
LOC103971348	-1.18212	5.54043	0.00134601	0.0361625
LOC103991586	2.37199	6.76124	0.00134803	0.0361825
LOC103982731	-2.01034	3.96119	0.00135766	0.0364063
LOC103987634	2.40572	2.33038	0.00136457	0.0365363
LOC103980457	1.9773	6.24001	0.00136553	0.0365363
LOC103985402	-1.02972	4.79863	0.00136746	0.0365363
LOC103994887	-1.67338	3.32378	0.00136766	0.0365363
LOC103992026	-1.88732	4.34429	0.00137474	0.0366909
LOC104000348	-1.10141	7.53444	0.00138861	0.0369635
LOC103996992	-1.10812	6.26489	0.00138877	0.0369635
LOC103972434	1.94895	3.39195	0.00138887	0.0369635
LOC103969612	-1.92785	4.05668	0.00139089	0.0369797
LOC103998463	2.74624	3.6371	0.00139209	0.0369797
LOC103972323	1.32488	4.28504	0.00139445	0.0369976
LOC104000688	2.54757	0.991057	0.00139537	0.0369976
LOC103993415	1.54922	5.72849	0.00140597	0.0372436
LOC103978329	1.61718	2.32485	0.00140786	0.0372589
LOC103983015	-1.40297	5.81667	0.00141102	0.0373068
LOC103989965	-1.15145	4.1581	0.0014123	0.0373068
LOC103987399	-1.29282	4.0719	0.00141586	0.0373659
LOC103991761	-1.17098	3.81444	0.00141989	0.0374375
LOC103992780	-2.0705	3.17708	0.00142651	0.0375771
LOC103996812	1.67484	3.37101	0.00143053	0.0376346
LOC103982259	2.37615	2.77822	0.00143135	0.0376346
LOC103990822	-1.17141	4.38736	0.00143579	0.0377164
LOC103972337	-6.36946	-0.446036	0.00144317	0.0378752
LOC103973847	2.97721	1.47079	0.00144938	0.0379893
LOC103985846	1.88218	4.76776	0.0014502	0.0379893
LOC103979451	-1.1241	5.85972	0.00146003	0.0382116
LOC103969283	-3.98701	3.09172	0.00146355	0.0382682
LOC103992641	2.15813	4.59263	0.00147052	0.0383894
LOC103995161	1.12038	6.16154	0.00147089	0.0383894
LOC103994597	3.91926	1.57896	0.00147337	0.038407
LOC103969029	1.77601	4.4611	0.00147427	0.038407
LOC103984799	4.16711	0.432401	0.00147612	0.0384197
LOC103999804	2.87905	5.23215	0.0014779	0.0384308
LOC103989449	1.59157	4.73517	0.00148422	0.0385341
LOC103984194	3.04204	7.08003	0.00148552	0.0385341
LOC103999662	-1.9462	4.96622	0.00148595	0.0385341
LOC103976604	-1.99858	3.68219	0.0014939	0.0387047
LOC103981473	-1.98331	2.45653	0.00149577	0.0387179
LOC103986372	-1.48187	5.31623	0.00150442	0.0389062
LOC103998052	-2.12806	2.17381	0.00150661	0.0389274
LOC103984198	2.20941	4.33528	0.00151417	0.0390487
LOC103993068	-1.73014	5.18511	0.00151479	0.0390487
LOC103980639	-2.28319	3.56966	0.00151544	0.0390487
LOC103988166	1.62032	5.03917	0.0015188	0.0390997
LOC103980200	-2.54503	0.444391	0.00152747	0.0392872
LOC103991479	1.46798	3.33885	0.00152908	0.0392931
LOC103972406	-1.12474	5.48676	0.00153723	0.0394615
LOC103985473	-1.27156	5.41026	0.00153842	0.0394615
LOC103983880	1.66379	2.99721	0.00155217	0.0397782
LOC103977447	2.34826	5.62839	0.00155421	0.0397944
LOC103999250	2.01771	5.33531	0.0015599	0.0398755
LOC103970819	2.06116	2.26281	0.00156148	0.0398755
LOC103987110	1.48294	3.72973	0.00156159	0.0398755
LOC103985615	1.7812	5.93322	0.00156682	0.0399728
LOC103988152	1.61594	6.59862	0.0015736	0.0401025
LOC103977595	-1.531	2.44418	0.00157473	0.0401025
LOC103989498	1.83465	2.59891	0.00157742	0.0401349
LOC103986394	-1.09801	4.43929	0.00158518	0.0402711
LOC103983614	0.869654	5.42076	0.00158561	0.0402711
LOC103997294	1.82176	3.80462	0.00159576	0.0404926
LOC103997723	-1.07878	6.55362	0.0016046	0.0406806
LOC103973009	3.02735	1.52871	0.0016221	0.0410874
LOC103986595	1.32386	2.7753	0.00163157	0.0412905
LOC103972185	1.13435	5.46812	0.00163458	0.0413054
LOC103985044	-1.42238	2.7463	0.00163508	0.0413054
LOC103985410	-1.39148	5.3048	0.00164595	0.0415431
LOC103979282	1.32639	6.6214	0.00164887	0.0415797
LOC103995950	1.42801	4.01554	0.00165345	0.0416517
LOC103971707	0.991599	4.72654	0.00165466	0.0416517
LOC103982626	-2.15506	8.65765	0.00166414	0.0418132
LOC103995404	-1.32077	7.9946	0.00166539	0.0418132
LOC103999944	-2.43939	2.84885	0.0016655	0.0418132
LOC103971205	-1.40673	3.69665	0.00167488	0.0420113
LOC103977988	1.56908	4.02	0.00167812	0.0420555
LOC103987702	2.33922	5.36625	0.00168562	0.0421959
LOC103985839	-1.80262	6.20445	0.00168688	0.0421959
LOC103987074	-2.42985	1.29833	0.00168819	0.0421959
LOC103970588	-2.09377	4.90232	0.00169016	0.0422078
LOC103972620	-3.79485	2.24979	0.00169786	0.0423627
LOC103987143	1.87469	2.42643	0.00170034	0.0423873
LOC103978461	1.41938	6.81151	0.00170563	0.0424818
LOC103972784	2.72911	2.96935	0.0017086	0.0424882
LOC104000636	2.15494	8.64344	0.00170971	0.0424882
LOC103999492	1.37881	5.19132	0.00171038	0.0424882
LOC103983168	1.92449	7.07208	0.00171343	0.0425267
LOC103997702	2.28165	2.48814	0.00171644	0.042543
LOC103991135	2.40068	3.35675	0.00171734	0.042543
LOC103983495	2.08251	2.46179	0.00171859	0.042543
LOC103986687	1.02138	3.95598	0.0017233	0.0426001
LOC103973639	-2.03329	3.84214	0.0017239	0.0426001
LOC103994177	1.25719	5.79137	0.00172572	0.0426077
LOC103995246	3.08348	3.66775	0.00172793	0.0426252
LOC103970479	1.45196	4.99676	0.00173184	0.0426741
LOC103997079	-3.45058	5.11476	0.00173292	0.0426741
LOC103971749	1.91323	7.28415	0.00173716	0.0427414
LOC103996921	-1.53013	3.58205	0.00174155	0.0427662
LOC103973321	2.09588	2.43086	0.00174201	0.0427662
LOC103988749	2.61436	3.8776	0.0017427	0.0427662
LOC103980177	2.51915	1.56427	0.00176053	0.0431025
LOC103992513	-1.44045	5.17105	0.00176094	0.0431025
LOC103970511	-1.33698	3.22396	0.00176239	0.0431025
LOC103998424	1.71016	2.38085	0.00176248	0.0431025
LOC103979883	1.1235	5.02671	0.00176689	0.043173
LOC104000847	1.8069	2.25008	0.00176933	0.0431955
LOC103980293	-1.53724	3.61121	0.00178164	0.0434585
LOC103991509	-2.29676	2.62	0.00178423	0.0434842
LOC103991914	-2.10489	7.37439	0.00178959	0.0435775
LOC103975417	-1.14193	5.03578	0.00179353	0.0436359
LOC103982262	0.929372	4.83605	0.00180465	0.0438687
LOC103996032	-1.38337	3.92885	0.00181005	0.0439624
LOC103985635	-1.2076	5.30658	0.00181431	0.0439873
LOC103990944	2.22238	2.91174	0.00181572	0.0439873
LOC103984547	-1.12679	4.63622	0.00181582	0.0439873
LOC103996663	-1.58667	3.97629	0.00181729	0.0439873
LOC103977653	2.53908	7.90167	0.00181884	0.0439873
LOC103975217	2.8923	1.6151	0.00182642	0.0441329
LOC103989738	-1.0109	3.9066	0.00182956	0.0441713
LOC103978891	2.88061	4.21507	0.00183378	0.0442355
LOC103973015	1.56961	3.94967	0.00185046	0.0445574
LOC103996328	-0.879503	5.29112	0.00185105	0.0445574
LOC103977720	1.36722	3.49399	0.00185274	0.0445574
LOC103993271	1.16124	4.21434	0.00185342	0.0445574
LOC103986344	-1.52621	4.48873	0.00185767	0.0446038
LOC103987903	-1.17081	5.21359	0.00185849	0.0446038
LOC103999646	1.50364	4.05265	0.00186402	0.0446945
LOC103993689	-1.22752	6.04817	0.00186542	0.0446945
LOC103987070	2.98813	3.3096	0.00186773	0.0447119
LOC103988046	-2.55354	3.21746	0.00186941	0.0447143
LOC103972408	2.52796	3.31886	0.00187909	0.044908
LOC103979359	1.90129	3.18457	0.00188305	0.0449648
LOC103996629	0.889633	6.35721	0.00188795	0.0450439
LOC103979734	1.61669	3.11363	0.00189211	0.0451051
LOC103987830	1.37351	4.37601	0.00190092	0.0452771
LOC103969135	1.39441	8.98396	0.00190352	0.0453009
LOC103994809	-1.04556	5.10392	0.00191531	0.0455074
LOC103985332	-1.39449	7.10882	0.00191541	0.0455074
LOC103994690	-1.88233	2.71498	0.00192133	0.0455094
LOC103978007	-1.16986	10.3917	0.00192169	0.0455094
LOC103983934	-3.17325	1.1263	0.00192182	0.0455094
LOC103996188	1.3757	4.01587	0.00192191	0.0455094
LOC103980454	-1.79768	3.46745	0.00192623	0.0455436
LOC103991618	-1.18033	3.92017	0.00192657	0.0455436
LOC103969266	1.69956	4.11837	0.00192956	0.0455762
LOC103990112	1.49871	2.84571	0.0019354	0.0456393
LOC103985296	1.36248	6.41419	0.00193545	0.0456393
LOC103975393	1.99808	8.04083	0.00193979	0.0457035
LOC103981004	-5.02266	-1.23377	0.00194536	0.0457968
LOC103984061	-5.90921	-0.0859889	0.0019482	0.0458132
LOC103969392	2.85867	1.66076	0.00194929	0.0458132
LOC103979016	2.97761	6.91076	0.00196097	0.0460495
LOC103992421	1.65304	4.16755	0.0019675	0.0461594
LOC103982284	-1.56215	7.63187	0.00196986	0.0461594
LOC103979383	-1.54638	3.36867	0.00197054	0.0461594
LOC103996605	-1.15089	6.98605	0.00197517	0.0462297
LOC103996159	1.44839	5.28131	0.0019807	0.046321
LOC103992619	-1.53217	6.95984	0.00198332	0.0463441
LOC103986009	-1.02373	4.15842	0.00198573	0.0463621
LOC103987156	-0.985398	6.08093	0.00199685	0.0465834
LOC103979137	-1.47173	3.23143	0.00200223	0.0466398
LOC103988780	-1.3404	2.7516	0.00200256	0.0466398
LOC103970417	-2.91533	3.33243	0.00200975	0.0467687
LOC103977279	1.31017	4.14018	0.00203052	0.0471804
LOC103982809	1.94833	3.12059	0.00203077	0.0471804
LOC103970559	2.80847	0.685713	0.00203555	0.0472527
LOC103988680	1.92692	4.88116	0.00203913	0.0472971
LOC103993013	2.32037	2.92367	0.00204119	0.0472989
LOC103996370	2.96425	5.21008	0.00204255	0.0472989
LOC103976599	4.52937	1.38029	0.00205215	0.0474825
LOC103987338	2.38336	2.06336	0.00205468	0.0475024
LOC103989444	-0.927956	4.88214	0.00205645	0.0475044
LOC103976380	-3.90288	2.62962	0.00206221	0.0475988
LOC103975328	-1.47659	6.2681	0.00207695	0.0478999
LOC103998494	2.9154	2.89558	0.00207898	0.0479079
LOC103984031	-1.40367	3.9455	0.00208474	0.0480014
LOC103979352	1.9408	3.31812	0.00210709	0.0484766
LOC103991562	1.49963	7.91129	0.0021118	0.0485091
LOC103981655	2.30854	2.38372	0.00211192	0.0485091
LOC103988609	1.83541	3.5734	0.00211718	0.0485905
LOC103996641	-1.24273	6.35168	0.0021254	0.0487398
LOC103990904	-1.35949	4.1295	0.0021303	0.0487474
LOC104000310	1.5458	5.12274	0.00213078	0.0487474
LOC104000358	-1.54515	5.28871	0.00213089	0.0487474
LOC103996158	2.34216	4.17471	0.00213483	0.0487981
LOC103989066	1.71844	3.06624	0.00214437	0.0489766
LOC103990594	-0.957438	4.73127	0.00214886	0.0490384
LOC103970984	1.39687	4.57368	0.00215053	0.0490384
LOC103983237	2.08523	3.93237	0.00215699	0.049146
LOC103984312	3.22901	4.14547	0.00217218	0.0494525
LOC103976098	0.98479	6.1717	0.00218984	0.0497859
LOC103991656	-2.02143	4.51951	0.00219183	0.0497859
LOC103987690	1.14444	4.00984	0.00219214	0.0497859
LOC103992705	-1.09679	4.6267	0.00219385	0.0497859
LOC103993557	-1.60767	4.75201	0.0022046	0.0499898

## Sheet: Bacillus_1h_Exclusive
NCBI Gene
LOC103975460		List of the 2252 differentially expressed genes exclusive in treatment Bacillus 1h. See figure below.
LOC103976494
LOC103970816
LOC103996021
LOC103976762
LOC103987231
LOC103974264
LOC103971514
LOC103977015
LOC103979145
LOC103979463
LOC103984670
LOC103984267
LOC103972232
LOC103980924
LOC103991437
LOC103969637
LOC103974240
LOC103981462
LOC103977739
LOC103976563
LOC103997954
LOC103968637
LOC103989097
LOC103997430
LOC103976469
LOC103987026
LOC103974201
LOC103988335
LOC103993962
LOC103995233
LOC103997668
LOC103976551
LOC103986184
LOC103985269
LOC103977010
LOC103987288
LOC103970363
LOC103976055
LOC103970499
LOC103996689
LOC103999983
LOC103982650
LOC103968860
LOC103993479
LOC103989522
LOC103970154
LOC103992722
LOC103990992
LOC103974383
LOC103987671
LOC103974153
LOC103990718
LOC103976712
LOC103993486
LOC103970275
LOC103977170
LOC103982272
LOC103994758
LOC103984504
LOC103985850
LOC103975363
LOC103997102
LOC103971083
LOC103991228
LOC103997446
LOC103989135
LOC103985370
LOC103995296
LOC103990442
LOC103997962
LOC103975524
LOC103995544
LOC103978934
LOC103974594
LOC103987486
LOC103997912
LOC103988074
LOC103984487
LOC103981411
LOC103987792
LOC103978913
LOC103980226
LOC103994628
LOC103980191
LOC103977597
LOC103989901
LOC103991525
LOC103971673
LOC103979867
LOC103995925
LOC103977081
LOC103989174
LOC104000490
LOC103991753
LOC103976124
LOC103973720
LOC103995602
LOC103980228
LOC103996656
LOC103987605
LOC103998853
LOC103995966
LOC103978006
LOC103994781
LOC103969018
LOC103991693
LOC103977780
LOC103990815
LOC103990171
LOC103999505
LOC103975144
LOC103990385
LOC103996732
LOC103980556
LOC103989487
LOC103981195
LOC103996804
LOC103980727
LOC103979635
LOC103978757
LOC103975461
LOC103979400
LOC103974198
LOC103968495
LOC103992251
LOC103979480
LOC103975348
LOC104001024
LOC103980237
LOC103970446
LOC104000360
LOC103990187
LOC104000507
LOC104000361
LOC103995447
LOC103994450
LOC103998504
LOC103987271
LOC103983019
LOC104000509
LOC103972416
LOC103999202
LOC103974236
LOC103985028
LOC103979686
LOC103981479
LOC103976071
LOC103974922
LOC103986072
LOC103983853
LOC103999201
LOC103974038
LOC103972159
LOC103993131
LOC103978344
LOC103986931
LOC103987054
LOC103971393
LOC103987612
LOC103990512
LOC103994154
LOC103990562
LOC103984951
LOC103994659
LOC103996400
LOC103968367
LOC103972926
LOC103981355
LOC104000762
LOC103978093
LOC103972276
LOC103990072
LOC103984569
LOC103991893
LOC103976420
LOC103990700
LOC103987272
LOC103975229
LOC103987677
LOC103993715
LOC103971050
LOC103992386
LOC103995115
LOC103979602
LOC103982776
LOC103972017
LOC103994198
LOC103989376
LOC103981466
LOC103973881
LOC103985391
LOC103969394
LOC103973359
LOC103991040
LOC103997026
LOC103993865
LOC103995079
LOC103985026
LOC103985623
LOC103981205
LOC103995199
LOC103993672
LOC103968749
LOC103990561
LOC103993625
LOC103989225
LOC103987024
LOC103990831
LOC103990125
LOC103991518
LOC103978252
LOC103997428
LOC103986636
LOC103972227
LOC103996657
LOC103995390
LOC103998545
LOC103980827
LOC103968583
LOC103991638
LOC103989513
LOC103973558
LOC103982666
LOC103986590
LOC103970943
LOC103999066
LOC103982701
LOC103995809
LOC103970034
LOC103995783
LOC103990142
LOC103985401
LOC103984435
LOC103992871
LOC103975616
LOC103969187
LOC103998479
LOC103977529
LOC103981485
LOC103977596
LOC103981728
LOC103968788
LOC103973263
LOC103969231
LOC103978831
LOC103996108
LOC103973182
LOC103992120
LOC103979845
LOC103971797
LOC103986123
LOC103997880
LOC103983842
LOC103991234
LOC103969713
LOC103995183
LOC103973488
LOC103977533
LOC103972170
LOC103989952
LOC103994549
LOC103973220
LOC103978885
LOC103997495
LOC103989169
LOC103998373
LOC103979498
LOC103978302
LOC103988634
LOC103987500
LOC103982946
LOC103969359
LOC103996109
LOC103999171
LOC103981848
LOC103996185
LOC103972013
LOC103996996
LOC103969994
LOC103969080
LOC103987928
LOC103969100
LOC103977558
LOC103987873
LOC103990574
LOC103989569
LOC103980327
LOC103994686
LOC103986375
LOC103980319
LOC103972028
LOC103971799
LOC103993909
LOC103986001
LOC103989871
LOC103991150
LOC103994725
LOC103975743
LOC103996333
LOC103999252
LOC103984067
LOC103999937
LOC103995315
LOC103994171
LOC103995071
LOC103990496
LOC103984858
LOC103990278
LOC103975041
LOC103988864
LOC103999064
LOC104000969
LOC103997060
LOC103994023
LOC103975676
LOC103975175
LOC103977542
LOC103982150
LOC103973875
LOC103982085
LOC103979772
LOC103982005
LOC103982722
LOC103990982
LOC103984241
LOC103986334
LOC103991621
LOC103983234
LOC103979785
LOC103992907
LOC103989157
LOC103978850
LOC103970762
LOC103972134
LOC103986939
LOC103968876
LOC103978171
LOC103971310
LOC103968613
LOC103991151
LOC103979803
LOC103982476
LOC103986117
LOC103977235
LOC103977698
LOC103974007
LOC103980982
LOC103991594
LOC103998799
LOC103982689
LOC103999038
LOC103993361
LOC103986973
LOC103972601
LOC103972734
LOC103975632
LOC103979354
LOC103969008
LOC103972138
LOC103994515
LOC103987157
LOC103971561
LOC103995285
LOC103969141
LOC103987864
LOC103982095
LOC104000716
LOC103984841
LOC103979709
LOC103970318
LOC103979408
LOC103972018
LOC103992860
LOC103979429
LOC104000149
LOC103972974
LOC103989644
LOC103993595
LOC103968911
LOC103983577
LOC103992049
LOC103999022
LOC103973266
LOC103987987
LOC103998742
LOC103998607
LOC103969751
LOC103969626
LOC103970497
LOC103985425
LOC103973637
LOC103969469
LOC103990446
LOC103992022
LOC103983358
LOC103992863
LOC103998647
LOC103979786
LOC103971170
LOC103990566
LOC103993452
LOC103999170
LOC103991862
LOC103992853
LOC103988319
LOC103989011
LOC104000693
LOC103974823
LOC103993106
LOC103987775
LOC103969123
LOC103986808
LOC103980338
LOC103990193
LOC103985755
LOC103976025
LOC103985926
LOC103987931
LOC103992240
LOC103998601
LOC103995837
LOC104000644
LOC103973363
LOC103992836
LOC103999765
LOC103978935
LOC103985045
LOC103987552
LOC103979702
LOC103980243
LOC103973404
LOC103991383
LOC103992289
LOC103973633
LOC103979034
LOC103987440
LOC103974331
LOC103976182
LOC103997307
LOC103972802
LOC103970337
LOC103980359
LOC103977087
LOC103976991
LOC103996985
LOC103978009
LOC103972510
LOC103982979
LOC103985119
LOC103992381
LOC103995072
LOC103976881
LOC103991794
LOC103969492
LOC103973602
LOC103994118
LOC103985700
LOC103984614
LOC103987583
LOC103978205
LOC103978140
LOC103982840
LOC103968764
LOC103985536
LOC103998366
LOC103986163
LOC103979724
LOC103984274
LOC103968967
LOC103979701
LOC103995918
LOC103989883
LOC103969558
LOC103970081
LOC103997769
LOC103978648
LOC103981940
LOC103974343
LOC103971757
LOC103988746
LOC103997157
LOC103974643
LOC103984516
LOC103979704
LOC103984991
LOC103977587
LOC103988161
LOC103973592
LOC103987760
LOC103993574
LOC103990816
LOC103979842
LOC103990784
LOC103975272
LOC103998923
LOC103987573
LOC103971627
LOC103982848
LOC103978096
LOC103998093
LOC103993227
LOC103998088
LOC104000153
LOC103996853
LOC104000711
LOC103972819
LOC103985474
LOC103993258
LOC103990702
LOC103996632
LOC103989806
LOC103987404
LOC103988853
LOC103984709
LOC103991340
LOC103972749
LOC103977480
LOC103979435
LOC103973932
LOC103969650
LOC103998772
LOC103997725
LOC103976319
LOC104000013
LOC103985534
LOC103998174
LOC103996086
LOC103993918
LOC103976024
LOC103991767
LOC103999071
LOC103971845
LOC103987331
LOC103995612
LOC103978718
LOC103991738
LOC103973494
LOC103986083
LOC103984320
LOC103985668
LOC103982825
LOC103969149
LOC103980397
LOC103972162
LOC103996189
LOC103991378
LOC103978838
LOC103999783
LOC103983586
LOC103999121
LOC103977949
LOC104000682
LOC103976913
LOC103990314
LOC103972834
LOC103987413
LOC103983571
LOC103987887
LOC103971894
LOC103980789
LOC103981932
LOC103996888
LOC103987068
LOC103996661
LOC103981948
LOC103976897
LOC103972299
LOC103994673
LOC103994135
LOC104000204
LOC103984941
LOC103972503
LOC103981717
LOC103994668
LOC103987882
LOC103989499
LOC103978752
LOC103999858
LOC103968786
LOC103980830
LOC103999103
LOC103971400
LOC103992160
LOC104001032
LOC103990588
LOC103976154
LOC103975747
LOC103993985
LOC103982734
LOC103984528
LOC103980932
LOC103985654
LOC103997509
LOC103968801
LOC103983089
LOC103971204
LOC103972246
LOC103985321
LOC103994440
LOC103977622
LOC103968460
LOC103996857
LOC103973049
LOC103968636
LOC103992098
LOC103969560
LOC103995956
LOC103978964
LOC103996588
LOC103977795
LOC103978080
LOC103985721
LOC103985702
LOC103975664
LOC103990801
LOC103990620
LOC103996796
LOC103985287
LOC103976030
LOC103990724
LOC103972249
LOC103989512
LOC103989787
LOC103969033
LOC103987045
LOC103991490
LOC103978689
LOC103975867
LOC103986130
LOC103994129
LOC103983881
LOC103991416
LOC103998823
LOC103994466
LOC103968531
LOC103970377
LOC103990600
LOC103990655
LOC103978464
LOC103988981
LOC103992370
LOC103991746
LOC103986825
LOC103986532
LOC103981690
LOC103981386
LOC103984849
LOC103969203
LOC103969332
LOC103973429
LOC103981221
LOC103993928
LOC103994191
LOC103975732
LOC103989194
LOC103997568
LOC103979990
LOC103979110
LOC103972757
LOC103993654
LOC103987200
LOC103993831
LOC103996870
LOC104000685
LOC103992027
LOC103994204
LOC103994065
LOC103979725
LOC103986625
LOC103987778
LOC103977428
LOC103970138
LOC103997441
LOC103981969
LOC103974862
LOC103970990
LOC103983670
LOC103972080
LOC103978943
LOC103979275
LOC103993138
LOC103970434
LOC103991233
LOC103982595
LOC103991461
LOC103990530
LOC103975873
LOC103991483
LOC103999938
LOC103991885
LOC103997326
LOC103995787
LOC103992212
LOC103978428
LOC103975431
LOC103999627
LOC103968909
LOC103972823
LOC103976978
LOC103971857
LOC103986828
LOC103980500
LOC103973583
LOC103985376
LOC103977939
LOC103971122
LOC103999318
LOC103993682
LOC104000780
LOC103997116
LOC103978707
LOC103994568
LOC103995133
LOC103983042
LOC103976050
LOC103984417
LOC103988995
LOC103997348
LOC103976691
LOC103979459
LOC103977885
LOC103988030
LOC103989148
LOC103985500
LOC103973725
LOC103978888
LOC103987982
LOC103968939
LOC103989634
LOC103973426
LOC103984678
LOC103979886
LOC103972086
LOC103979771
LOC103999912
LOC103980267
LOC103990310
LOC103974656
LOC103971309
LOC103976764
LOC103982434
LOC103986791
LOC103984195
LOC103971641
LOC103991861
LOC104000485
LOC103995943
LOC103968450
LOC103981796
LOC103971402
LOC103980348
LOC103985656
LOC103978190
LOC103986303
LOC103993277
LOC103971987
LOC103995448
LOC103980004
LOC103993419
LOC103970244
LOC103988178
LOC103971871
LOC103998565
LOC103994849
LOC104000595
LOC103988482
LOC103988263
LOC103983594
LOC103991216
LOC103983690
LOC103973260
LOC103991664
LOC103981329
LOC103983955
LOC103991494
LOC103982126
LOC103982806
LOC103993373
LOC103991250
LOC103999157
LOC103980916
LOC103975789
LOC103989479
LOC103975839
LOC103997755
LOC103973951
LOC103997719
LOC103985501
LOC103989056
LOC103969465
LOC103968723
LOC104000856
LOC104000990
LOC103994410
LOC104000868
LOC103986134
LOC103992688
LOC103974498
LOC103991603
LOC103979001
LOC103996360
LOC103971097
LOC103986818
LOC103975251
LOC103970791
LOC103979291
LOC103987336
LOC103969695
LOC103977327
LOC103996539
LOC103992203
LOC103993306
LOC103983044
LOC103999307
LOC103981321
LOC103977657
LOC103993537
LOC103973825
LOC103993699
LOC104001035
LOC103968983
LOC104000954
LOC104000415
LOC103983914
LOC103980911
LOC103988626
LOC103996928
LOC103980704
LOC103994722
LOC103992064
LOC103986869
LOC103968874
LOC103980286
LOC103980728
LOC103981394
LOC103984620
LOC103990305
LOC103983018
LOC103997918
LOC103986322
LOC103973556
LOC103987965
LOC103968758
LOC103979345
LOC103992290
LOC103969282
LOC103986936
LOC103999649
LOC103996030
LOC103989258
LOC103992782
LOC103989334
LOC103989652
LOC103969184
LOC103987840
LOC103995028
LOC103991696
LOC103997149
LOC103997359
LOC103998692
LOC103972396
LOC103979993
LOC103981105
LOC103970753
LOC103993215
LOC103983037
LOC103979101
LOC103970465
LOC103968473
LOC103973039
LOC103998098
LOC103988836
LOC103996042
LOC103970058
LOC103986081
LOC103980002
LOC103987881
LOC103979055
LOC103986371
LOC103984863
LOC103989994
LOC103980373
LOC103973230
LOC103993774
LOC103989127
LOC103985349
LOC103997253
LOC103998863
LOC103968781
LOC103985630
LOC103991692
LOC103983959
LOC103987927
LOC103996176
LOC103997996
LOC103997618
LOC103970494
LOC103984249
LOC103982087
LOC103973127
LOC103978456
LOC103989537
LOC103987569
LOC103986628
LOC103971003
LOC103999521
LOC103994660
LOC103984122
LOC103972202
LOC103987782
LOC103978400
LOC103974355
LOC103988875
LOC103993084
LOC103987194
LOC103978309
LOC103980317
LOC103975148
LOC103978619
LOC103978582
LOC103985798
LOC103987459
LOC103986840
LOC103979662
LOC103996553
LOC103985199
LOC103991463
LOC103989185
LOC103996799
LOC103997005
LOC103981268
LOC104000502
LOC103991226
LOC103978963
LOC103974566
LOC103968446
LOC103982748
LOC103998590
LOC103971462
LOC103986780
LOC103984626
LOC103972569
LOC103987538
LOC103994585
LOC103986095
LOC103969490
LOC104000867
LOC103992646
LOC103992179
LOC103970718
LOC103994828
LOC103979146
LOC103999549
LOC103987009
LOC103973733
LOC103980181
LOC103994956
LOC103993278
LOC103972991
LOC103986598
LOC103984934
LOC103995152
LOC103998271
LOC103996353
LOC103969641
LOC103996829
LOC103982929
LOC103984728
LOC103969227
LOC103972431
LOC103982732
LOC103981942
LOC103969616
LOC103968851
LOC103968610
LOC103978414
LOC103987579
LOC103981206
LOC103993474
LOC103971318
LOC103999053
LOC103993340
LOC104000302
LOC103998099
LOC103984281
LOC103995772
LOC103982773
LOC103968987
LOC103969674
LOC103979537
LOC103987264
LOC103989851
LOC103992899
LOC103983103
LOC103992380
LOC103987822
LOC104000801
LOC103980740
LOC103989037
LOC103996311
LOC103977511
LOC103982730
LOC103974948
LOC103991926
LOC103981844
LOC103991413
LOC103995798
LOC103972530
LOC103975343
LOC103996692
LOC103980316
LOC103989735
LOC103993507
LOC103999593
LOC103968567
LOC103981246
LOC103979328
LOC103980891
LOC103980939
LOC103969605
LOC103986206
LOC103978063
LOC103980923
LOC103976901
LOC103970898
LOC103985050
LOC103982080
LOC103970202
LOC103998451
LOC103973274
LOC103975043
LOC103971524
LOC103980915
LOC103981082
LOC103987105
LOC103974001
LOC103978950
LOC103990987
LOC103975060
LOC103975826
LOC103990764
LOC103990368
LOC103975453
LOC103998183
LOC103992718
LOC103985274
LOC103983074
LOC103995502
LOC104000632
LOC103990309
LOC103992489
LOC103992285
LOC103979477
LOC103982932
LOC103986118
LOC103970162
LOC103997919
LOC103990634
LOC103980599
LOC103971038
LOC103995808
LOC103998544
LOC103990040
LOC103982345
LOC103996643
LOC103994631
LOC103971011
LOC103983474
LOC103968553
LOC103991285
LOC103974546
LOC103969221
LOC103997534
LOC103997013
LOC103985414
LOC104000138
LOC103989347
LOC103983785
LOC103995569
LOC103994514
LOC103974369
LOC103973859
LOC103979684
LOC103980970
LOC103977240
LOC103975961
LOC103997909
LOC103995591
LOC103995622
LOC103997480
LOC103975508
LOC103975689
LOC103988382
LOC103999772
LOC103993991
LOC103974102
LOC103990369
LOC103994056
LOC103972108
LOC103985768
LOC103987641
LOC103986038
LOC103975680
LOC103978326
LOC103971925
LOC103984740
LOC103993318
LOC103989565
LOC103979658
LOC103996638
LOC103996156
LOC103969795
LOC103975306
LOC103991634
LOC103978243
LOC103991736
LOC103970308
LOC103976086
LOC103996102
LOC103970734
LOC103971161
LOC103976754
LOC103998824
LOC103990738
LOC103974613
LOC103986933
LOC103988757
LOC103976718
LOC103997995
LOC103986795
LOC103996735
LOC103976682
LOC103993789
LOC103992946
LOC103993836
LOC103997376
LOC103987817
LOC103988071
LOC103992712
LOC103976453
LOC103999728
LOC103997459
LOC103973823
LOC103997536
LOC103995086
LOC103982081
LOC103986698
LOC103987774
LOC103970379
LOC103985567
LOC103979213
LOC103981388
LOC103983491
LOC103981915
LOC103985011
LOC103992597
LOC103982420
LOC103968489
LOC103977921
LOC104000072
LOC103998623
LOC104000664
LOC103997360
LOC103994768
LOC103975954
LOC103992334
LOC103971710
LOC103993060
LOC103976040
LOC103988549
LOC103978704
LOC103992551
LOC103983035
LOC103993726
LOC103998272
LOC103993961
LOC103982652
LOC103987449
LOC103988810
LOC103988996
LOC103985756
LOC103988889
LOC103971152
LOC103987048
LOC103974596
LOC103984940
LOC103988086
LOC103977204
LOC103999065
LOC103989623
LOC103983117
LOC103978498
LOC103996191
LOC103995757
LOC103976145
LOC103987480
LOC103983809
LOC103987246
LOC103995423
LOC103985744
LOC103978867
LOC103977172
LOC103971964
LOC103991320
LOC103983100
LOC103971991
LOC103980928
LOC103988921
LOC103978427
LOC103975064
LOC103972320
LOC103992354
LOC103977115
LOC103991279
LOC103987201
LOC103995559
LOC103994330
LOC103997584
LOC103981337
LOC103982004
LOC103970360
LOC103968620
LOC103968502
LOC103986837
LOC103986591
LOC103992137
LOC103978917
LOC103997410
LOC103985301
LOC103971535
LOC103985571
LOC103975515
LOC103976471
LOC103982635
LOC103994470
LOC103996808
LOC103985051
LOC103973280
LOC103977296
LOC103992682
LOC103988813
LOC103999784
LOC103984130
LOC103987076
LOC103996494
LOC103993440
LOC103989601
LOC103999101
LOC103974279
LOC103969885
LOC103992414
LOC103975918
LOC103999372
LOC103976079
LOC103982771
LOC103981254
LOC103979661
LOC103975628
LOC103973538
LOC104000952
LOC103968789
LOC103987806
LOC103995087
LOC103979714
LOC103970298
LOC103996034
LOC104000350
LOC103999406
LOC103993232
LOC103983620
LOC103972226
LOC103982197
LOC103978944
LOC103978744
LOC103997736
LOC103980202
LOC103987010
LOC103991714
LOC103975237
LOC103969063
LOC103978527
LOC103996023
LOC103988173
LOC103987855
LOC103987345
LOC103974216
LOC103993867
LOC103968673
LOC103971760
LOC103983009
LOC103977979
LOC103972010
LOC103998562
LOC103995020
LOC103984159
LOC103992434
LOC103968568
LOC103982584
LOC103973776
LOC103996040
LOC103985235
LOC103989687
LOC103971613
LOC103973948
LOC104000703
LOC103980802
LOC103994064
LOC103978860
LOC103986017
LOC104000722
LOC103968877
LOC103968509
LOC103982746
LOC104000316
LOC103992347
LOC103975400
LOC103972029
LOC103974700
LOC103986694
LOC104000234
LOC103979265
LOC103998019
LOC103984714
LOC103989391
LOC103998011
LOC103972970
LOC103977886
LOC103982835
LOC103975481
LOC103993356
LOC103983427
LOC103981312
LOC103998556
LOC103982099
LOC103990115
LOC103982640
LOC103998383
LOC103995797
LOC103994537
LOC103998024
LOC103969059
LOC103999359
LOC103984294
LOC103990829
LOC103970150
LOC103995193
LOC103995907
LOC103981977
LOC103983682
LOC103992507
LOC103994200
LOC103999895
LOC103972675
LOC103982616
LOC103986124
LOC103970330
LOC103998349
LOC103985373
LOC103982980
LOC103990208
LOC103984277
LOC104000216
LOC103977139
LOC103981447
LOC103972148
LOC103980018
LOC103987788
LOC103994618
LOC103997696
LOC103986223
LOC103991548
LOC103999908
LOC103979666
LOC103989254
LOC103977836
LOC103987204
LOC103992341
LOC103979737
LOC103999628
LOC103971612
LOC103999920
LOC103972550
LOC103989125
LOC103993023
LOC103969821
LOC103971742
LOC103987969
LOC103980772
LOC103969639
LOC103992220
LOC103980309
LOC103979733
LOC103970022
LOC103972390
LOC103973463
LOC103984538
LOC103994501
LOC103987276
LOC103986583
LOC103989583
LOC103969193
LOC103972022
LOC103984109
LOC103983852
LOC103984508
LOC103997443
LOC103968767
LOC103983482
LOC103994081
LOC103997554
LOC103978671
LOC103985212
LOC103982075
LOC103977210
LOC103986383
LOC103999021
LOC103981121
LOC103972307
LOC103999738
LOC103984257
LOC104000338
LOC103973360
LOC103994834
LOC103986609
LOC103983039
LOC103976175
LOC103991991
LOC103968601
LOC103974320
LOC103988558
LOC103994020
LOC103968716
LOC103991708
LOC103969807
LOC103981149
LOC103971221
LOC103974958
LOC103981973
LOC103993866
LOC103970782
LOC103993879
LOC103972446
LOC103995617
LOC103979221
LOC103984053
LOC103983321
LOC103982831
LOC103985548
LOC103984958
LOC103999589
LOC103987058
LOC103971563
LOC103971547
LOC103974798
LOC103970161
LOC103970094
LOC103993635
LOC103998400
LOC103997145
LOC103999183
LOC103993380
LOC103982803
LOC103979983
LOC103969275
LOC103970292
LOC103994072
LOC103968398
LOC103999246
LOC103984836
LOC103976103
LOC103997606
LOC103973514
LOC103993363
LOC103980564
LOC103994798
LOC103998404
LOC103968587
LOC103993000
LOC103979876
LOC103979407
LOC103975596
LOC103968743
LOC103999659
LOC103992333
LOC103985598
LOC103994487
LOC103993750
LOC103997092
LOC103983092
LOC103990360
LOC103992854
LOC103997029
LOC103975733
LOC103972252
LOC103970570
LOC103986264
LOC103989032
LOC103982790
LOC103982592
LOC103977305
LOC103974400
LOC103999743
LOC103987069
LOC103980236
LOC103969407
LOC103981818
LOC103994571
LOC103992014
LOC103978072
LOC103986141
LOC103971844
LOC103981000
LOC103991415
LOC103972456
LOC103977911
LOC103974295
LOC103986978
LOC104000673
LOC103989130
LOC103969717
LOC103987386
LOC103982386
LOC104000957
LOC103988512
LOC103982267
LOC103980677
LOC103978223
LOC103983680
LOC103974107
LOC103985168
LOC103969258
LOC103979889
LOC103984410
LOC103998237
LOC103974753
LOC103985333
LOC103997104
LOC103998084
LOC103978824
LOC103984903
LOC104000487
LOC103990931
LOC103992735
LOC103999178
LOC103976046
LOC103978257
LOC103982123
LOC104000268
LOC103989425
LOC103993740
LOC103986724
LOC103981482
LOC103984861
LOC103975840
LOC103996654
LOC103977658
LOC103979315
LOC103976177
LOC103970954
LOC103986539
LOC103972317
LOC103979424
LOC103997435
LOC103986332
LOC103981933
LOC103992363
LOC103978561
LOC103982207
LOC103982048
LOC103971738
LOC103994658
LOC103983760
LOC103986442
LOC103981083
LOC103978630
LOC103973931
LOC103984873
LOC103983155
LOC103997567
LOC103998606
LOC103988073
LOC103969448
LOC103987333
LOC103976530
LOC103993075
LOC103980234
LOC103975356
LOC103970580
LOC103980475
LOC103981144
LOC103984229
LOC103981966
LOC103995893
LOC103995129
LOC103989835
LOC103995060
LOC103981506
LOC103996269
LOC103975449
LOC103992490
LOC103969475
LOC103973501
LOC103978260
LOC103996378
LOC103970601
LOC103996904
LOC103989496
LOC103980219
LOC103989422
LOC103980647
LOC103982009
LOC103998168
LOC103982254
LOC103976645
LOC103979141
LOC103984657
LOC104000142
LOC103994100
LOC103976562
LOC104000469
LOC103974905
LOC103978702
LOC103971530
LOC103983942
LOC103990411
LOC103975639
LOC103982465
LOC103995212
LOC103971907
LOC103976782
LOC103973869
LOC103997375
LOC103976564
LOC103996620
LOC103986567
LOC103994024
LOC103995095
LOC103978293
LOC103975059
LOC103972838
LOC103985305
LOC103988401
LOC103996684
LOC103982880
LOC103993945
LOC103982742
LOC103972445
LOC103990694
LOC103999975
LOC103995945
LOC103995561
LOC103982362
LOC103994684
LOC103985800
LOC103968633
LOC103977308
LOC104000404
LOC103982928
LOC103998621
LOC103992300
LOC103979090
LOC103995550
LOC103997091
LOC103990850
LOC103976800
LOC103997757
LOC103975937
LOC103986561
LOC103973561
LOC103989202
LOC103972438
LOC103994096
LOC103970391
LOC103988560
LOC104000605
LOC103971146
LOC103988233
LOC103970548
LOC103970277
LOC103982447
LOC103999460
LOC103999278
LOC103991335
LOC103969430
LOC103991225
LOC103971469
LOC103997619
LOC103991311
LOC103974508
LOC103975896
LOC103989325
LOC103969442
LOC104001005
LOC103991578
LOC103983796
LOC103984034
LOC103979653
LOC103992657
LOC103993588
LOC103968827
LOC103986373
LOC103972301
LOC103971460
LOC103991426
LOC103981181
LOC103983950
LOC103991545
LOC103987494
LOC103980888
LOC103996180
LOC103976720
LOC103978018
LOC103991612
LOC103982998
LOC103993198
LOC103990270
LOC103970120
LOC103993467
LOC103984418
LOC103973366
LOC104000763
LOC103969574
LOC103991414
LOC103996297
LOC103975715
LOC103975247
LOC103996005
LOC103976779
LOC103989598
LOC103982630
LOC103978907
LOC103969379
LOC103982586
LOC103979927
LOC103997460
LOC103987419
LOC103968629
LOC103969318
LOC103978959
LOC103977482
LOC103971872
LOC103979074
LOC103969527
LOC103989463
LOC103990021
LOC103975556
LOC103991840
LOC103978957
LOC103991581
LOC103982425
LOC103979753
LOC103985403
LOC103989152
LOC103996640
LOC103978311
LOC103982869
LOC103995326
LOC103996691
LOC103972196
LOC103997262
LOC103993720
LOC104000900
LOC103980778
LOC103984733
LOC103990076
LOC103986027
LOC103982673
LOC103984888
LOC103984039
LOC103972087
LOC103989251
LOC103993523
LOC103991359
LOC103985052
LOC103970790
LOC103990160
LOC103990854
LOC103969317
LOC103991237
LOC103979516
LOC103979825
LOC103984463
LOC103986201
LOC103996966
LOC103972460
LOC103982888
LOC103991635
LOC103981115
LOC103974731
LOC103987609
LOC103989683
LOC103981548
LOC103981827
LOC103989625
LOC103969776
LOC103977562
LOC103987450
LOC103973050
LOC103994968
LOC103990068
LOC103997661
LOC103971344
LOC103978742
LOC103992963
LOC103992557
LOC103984225
LOC103972890
LOC103973540
LOC103992734
LOC103992282
LOC103986972
LOC103981758
LOC103991970
LOC103978591
LOC103978203
LOC103998000
LOC103968978
LOC103999430
LOC103995011
LOC104000071
LOC103977974
LOC103997007
LOC103971417
LOC103982454
LOC103971790
LOC103996341
LOC103998344
LOC103972603
LOC103989912
LOC103997671
LOC103976454
LOC103974597
LOC103999387
LOC103979093
LOC103987593
LOC103996065
LOC104000176
LOC103969460
LOC103985704
LOC103993922
LOC103981317
LOC103999354
LOC103979639
LOC103983644
LOC103977594
LOC103976561
LOC103989967
LOC103992678
LOC103993792
LOC103990463
LOC104000515
LOC103978202
LOC103997085
LOC103979191
LOC103995385
LOC103981197
LOC103980272
LOC103973660
LOC103987924
LOC103976852
LOC103973347
LOC103983810
LOC103982310
LOC103972310
LOC103977513
LOC103990281
LOC103972340
LOC103968380
LOC103994863
LOC103980672
LOC103982139
LOC103969764
LOC103977176
LOC103969303
LOC103987351
LOC103998631
LOC103990077
LOC104001034
LOC103972917
LOC103973499
LOC103970276
LOC103996319
LOC103969064
LOC103988367
LOC103998798
LOC103973090
LOC103969396
LOC103979452
LOC103984636
LOC103982950
LOC103980565
LOC103978116
LOC103975980
LOC103981072
LOC103976649
LOC103997187
LOC103971551
LOC103981166
LOC104000883
LOC103973939
LOC103998880
LOC103981518
LOC103986352
LOC103989008
LOC103995249
LOC104000272
LOC103982481
LOC103984038
LOC103985468
LOC103969027
LOC103984532
LOC103983595
LOC103983895
LOC103971507
LOC103972109
LOC103975265
LOC103990292
LOC103976304
LOC103975120
LOC103999708
LOC103973093
LOC103970788
LOC103980204
LOC103970416
LOC103969718
LOC103989699
LOC103990156
LOC103977993
LOC104000619
LOC103997940
LOC103978639
LOC103970803
LOC103994969
LOC103978082
LOC103985363
LOC103989929
LOC103975124
LOC103983874
LOC103969339
LOC103992804
LOC103997208
LOC103995387
LOC103987431
LOC103982264
LOC103983601
LOC103977561
LOC103978627
LOC103981959
LOC103980754
LOC103977144
LOC103976001
LOC103992645
LOC103973920
LOC103990771
LOC103974746
LOC103980071
LOC103988115
LOC103978294
LOC103973240
LOC103998285
LOC103998741
LOC103989296
LOC103982046
LOC104000181
LOC103995767
LOC103989802
LOC103970789
LOC103976053
LOC103994382
LOC103969281
LOC103970964
LOC103987303
LOC103991956
LOC103976026
LOC103977383
LOC103972440
LOC103993787
LOC103990946
LOC103991445
LOC103988088
LOC103999173
LOC103986195
LOC103995389
LOC103990603
LOC103968981
LOC103997086
LOC103973828
LOC104000599
LOC103997920
LOC103981712
LOC103991981
LOC103990648
LOC103985608
LOC103992757
LOC103991742
LOC103999723
LOC103982435
LOC103976455
[truncated: 253 more rows]

## Sheet: Bacillus_1h_48h_Intersection
NCBI Gene
LOC103974595		List of the 111 differentially expressed genes exclusively shared by treatments Bacillus 1h and Bacillus 48h. See figure below.
LOC103977376
LOC104000370
LOC103983200
LOC103972710
LOC103972219
LOC103987025
LOC103989184
LOC103990705
LOC103987112
LOC103991939
LOC103968557
LOC103985629
LOC103976941
LOC103998043
LOC103993022
LOC103987455
LOC103983661
LOC103978650
LOC103995522
LOC103983369
LOC103986720
LOC103970894
LOC103978530
LOC103977767
LOC103976213
LOC103991201
LOC103986671
LOC103987950
LOC104000388
LOC103969045
LOC103991148
LOC103968979
LOC103997127
LOC103989585
LOC103994182
LOC103984675
LOC103994594
LOC103999409
LOC103978482
LOC103991221
LOC103975976
LOC103991408
LOC103978784
LOC103999145
LOC103988275
LOC103990853
LOC103971061
LOC103996942
LOC103977369
LOC103984224
LOC103989306
LOC103993842
LOC103973002
LOC103993813
LOC103982502
LOC103988323
LOC103994519
LOC103998985
LOC103971716
LOC103985989
LOC103984245
LOC103977715
LOC103973389
LOC103979305
LOC103980720
LOC103969432
LOC103992248
LOC103974861
LOC103983547
LOC103978245
LOC103993237
LOC103981792
LOC103968790
LOC103976955
LOC103976410
LOC103975581
LOC103996617
LOC103984897
LOC103983024
LOC104000237
LOC103984222
LOC103993065
LOC103995321
LOC103995034
LOC103976749
LOC103978407
LOC103988054
LOC103999556
LOC103980816
LOC103981910
LOC103987839
LOC103975678
LOC103994439
LOC103994962
LOC103972466
LOC103986158
LOC104000843
LOC103986086
LOC103982765
LOC103990716
LOC103991037
LOC103974929
LOC103970129
LOC103997997
LOC104000699
LOC103968541
LOC103989650
LOC103978974
LOC103987611
LOC103974511

## Sheet: Bacillus_48h_Exclusive
NCBI Gene
LOC103968966		List of the 736 differentially expressed genes exclusive in treatment Bacillus 48h. See figure below.
LOC103989707
LOC103975738
LOC103990621
LOC103981555
LOC103991268
LOC103998006
LOC103998196
LOC103984094
LOC103979318
LOC103972357
LOC103991544
LOC103985118
LOC103991553
LOC103985248
LOC103968471
LOC103994073
LOC103995360
LOC103986142
LOC103994134
LOC103984746
LOC103973250
LOC103982033
LOC103981761
LOC103970092
LOC103982822
LOC103982266
LOC103994110
LOC103977372
LOC103993558
LOC103993072
LOC103981828
LOC103987744
LOC103986111
LOC103992662
LOC103999271
LOC103986849
LOC103979035
LOC103984965
LOC103975090
LOC103996978
LOC103993732
LOC103986672
LOC103969546
LOC103989769
LOC103989101
LOC103990215
LOC103985063
LOC103982147
LOC103999162
LOC103977559
LOC103983939
LOC103977088
LOC103981814
LOC103980020
LOC103990342
LOC104000889
LOC103980056
LOC103989633
LOC103999685
LOC103974206
LOC103976082
LOC103980967
LOC103977893
LOC103982220
LOC103991198
LOC103988032
LOC103989012
LOC103976770
LOC103982684
LOC103972806
LOC103990178
LOC103976791
LOC103980161
LOC103981955
LOC103999568
LOC103980706
LOC103987889
LOC103993530
LOC103992054
LOC103971903
LOC103998749
LOC103993570
LOC103982334
LOC103984147
LOC103984511
LOC103997977
LOC103982509
LOC103975699
LOC103993960
LOC103999622
LOC103990631
LOC103971966
LOC103980196
LOC103995265
LOC103976840
LOC103979118
LOC103989933
LOC103996933
LOC103995439
LOC103983272
LOC103972766
LOC103998389
LOC103975902
LOC104000650
LOC103975927
LOC104000325
LOC103974927
LOC103986295
LOC103989098
LOC103992844
LOC103975427
LOC103989107
LOC103997732
LOC103993619
LOC103975211
LOC103989244
LOC103978322
LOC103986414
LOC103980324
LOC103995217
LOC103979664
LOC103975098
LOC103997566
LOC103987294
LOC103971208
LOC103997574
LOC103969797
LOC103999306
LOC103991423
LOC103991542
LOC103981061
LOC103974970
LOC103988916
LOC103982664
LOC103984182
LOC103984022
LOC103982723
LOC103973111
LOC103997093
LOC103993324
LOC103981451
LOC103986621
LOC103975573
LOC103970050
LOC103978174
LOC103969562
LOC103981847
LOC103991134
LOC103997462
LOC103976708
LOC103988322
LOC103971040
LOC103997387
LOC103988072
LOC103999644
LOC103977753
LOC103977049
LOC103975557
LOC103982683
LOC103973979
LOC103992043
LOC103993926
LOC103973175
LOC103988777
LOC103992861
LOC103985111
LOC103987091
LOC103996725
LOC103989402
LOC103983124
LOC103984305
LOC104000655
LOC103983138
LOC103970175
LOC104000409
LOC103987141
LOC103983422
LOC103996907
LOC103980584
LOC103987063
LOC103976772
LOC103978235
LOC103980156
LOC103981601
LOC103973205
LOC103997547
LOC103972115
LOC103972079
LOC103994094
LOC103977099
LOC103992145
LOC103996538
LOC103983899
LOC103969488
LOC103968717
LOC103984145
LOC103986263
LOC103977858
LOC103970096
LOC103969700
LOC103970359
LOC103990320
LOC103998815
LOC103997793
LOC103990422
LOC103983935
LOC103996580
LOC103973155
LOC103994607
LOC103980815
LOC103993416
LOC103978746
LOC103968910
LOC103989410
LOC103989247
LOC103992010
LOC103968862
LOC103986353
LOC103989571
LOC103996009
LOC103968615
LOC103992239
LOC103976285
LOC103993364
LOC103986289
LOC103994614
LOC103998145
LOC103977445
LOC103991669
LOC103982170
LOC103990458
LOC103970658
LOC103991554
LOC103977615
LOC103986360
LOC103986044
LOC103971986
LOC103971108
LOC103969349
LOC103969308
LOC103993289
LOC103979232
LOC103972415
LOC103974226
LOC103994967
LOC103999189
LOC103993408
LOC103975541
LOC103989024
LOC103993510
LOC103979929
LOC103993709
LOC103997660
LOC103970778
LOC103989150
LOC103982377
LOC103989204
LOC103998838
LOC103999342
LOC103997006
LOC103988528
LOC103980450
LOC103987530
LOC103974128
LOC103971470
LOC103994683
LOC103992741
LOC103999790
LOC103994992
LOC103984865
LOC103992056
LOC103981423
LOC103973694
LOC103974300
LOC103980340
LOC103988111
LOC104000500
LOC103983633
LOC103999480
LOC103977976
LOC103992729
LOC103994455
LOC103977863
LOC103975726
LOC103970436
LOC103978423
LOC103996007
LOC103995636
LOC103990934
LOC103987687
LOC103969437
LOC103979819
LOC103990681
LOC103988934
LOC103970422
LOC103996941
LOC103999564
LOC103969103
LOC103997289
LOC103970647
LOC103978966
LOC103987544
LOC103987831
LOC104000808
LOC103984137
LOC103987658
LOC103974223
LOC103984132
LOC103992687
LOC103998698
LOC103973353
LOC103983014
LOC103997787
LOC103973020
LOC103977926
LOC103983102
LOC103973628
LOC103996022
LOC103977581
LOC103979087
LOC103969691
LOC103985836
LOC103992151
LOC103979406
LOC103970577
LOC103993738
LOC103987696
LOC103990299
LOC103979999
LOC103974739
LOC103975280
LOC103996204
LOC103995369
LOC103970142
LOC103982970
LOC103976209
LOC103978880
LOC103985144
LOC103986016
LOC103997140
LOC103987243
LOC103983175
LOC103983152
LOC103994707
LOC103987625
LOC103983870
LOC103976878
LOC103990137
LOC103975739
LOC103988648
LOC103992432
LOC103997533
LOC103989673
LOC103997306
LOC103983782
LOC103995694
LOC103986852
LOC103994563
LOC103974839
LOC103980281
LOC103992635
LOC103975507
LOC103978340
LOC103969348
LOC103993112
LOC103976169
LOC103992607
LOC103972742
LOC103981697
LOC103978305
LOC103979672
LOC103999951
LOC103980586
LOC104000251
LOC104000278
LOC103991318
LOC103993930
LOC103976967
LOC103985494
LOC103980769
LOC103981558
LOC103992636
LOC103998793
LOC103979681
LOC103995732
LOC103982231
LOC103987320
LOC103995179
LOC103996699
LOC103997951
LOC103998353
LOC103991920
LOC103978238
LOC103995167
LOC103977727
LOC103976721
LOC103995431
LOC103977975
LOC103991172
LOC103987038
LOC103969596
LOC103970766
LOC103987379
LOC103986282
LOC103973344
LOC103974337
LOC104000010
LOC103974520
LOC103979386
LOC103977522
LOC103979173
LOC103982735
LOC103974426
LOC103990546
LOC103990265
LOC103983528
LOC103972462
LOC103975686
LOC103985460
LOC103984284
LOC103998775
LOC103996385
LOC103973235
LOC103988022
LOC103969708
LOC103988273
LOC103986090
LOC103982148
LOC103995121
LOC103983434
LOC103997634
LOC103983584
LOC103979504
LOC103979288
LOC103988328
LOC103983933
LOC103982122
LOC103970168
LOC103971495
LOC103990523
LOC103992495
LOC103988210
LOC104000914
LOC103978288
LOC103984696
LOC103988063
LOC103986693
LOC103975310
LOC103974977
LOC103983658
LOC103980297
LOC103989203
LOC103971855
LOC103995965
LOC103978748
LOC103990294
LOC103982307
LOC103999673
LOC103968551
LOC103981287
LOC104000855
LOC103992149
LOC104000712
LOC103973273
LOC103983696
LOC103977631
LOC103972191
LOC103997827
LOC103997308
LOC103982213
LOC103979871
LOC103987051
LOC103987385
LOC103989397
LOC103982042
LOC103978602
LOC103993936
LOC103984772
LOC103974763
LOC103980510
LOC103985557
LOC104000652
LOC103984097
LOC103995294
LOC103987814
LOC103991428
LOC103972912
LOC104000592
LOC103994555
LOC103991747
LOC103985807
LOC103973876
LOC103978884
LOC103992394
LOC103998618
LOC103972501
LOC103988772
LOC103996172
LOC103992902
LOC103972151
LOC103970662
LOC103970510
LOC103993584
LOC103993812
LOC103989063
LOC103994776
LOC103995951
LOC103980853
LOC103984555
LOC103982238
LOC103977097
LOC103990754
LOC103981456
LOC103989352
LOC103997649
LOC103998078
LOC103970366
LOC103980086
LOC103993267
LOC103971030
LOC103977149
LOC103971677
LOC103984594
LOC103971387
LOC103993804
LOC103980856
LOC103996637
LOC103971235
LOC103975501
LOC103996275
LOC103985840
LOC103969464
LOC103971965
LOC103999618
LOC103974450
LOC103975434
LOC103977055
LOC103993826
LOC103992768
LOC103996129
LOC103978157
LOC103970141
LOC103998764
LOC103990050
LOC104000472
LOC103974134
LOC103982618
LOC103987906
LOC103995405
LOC103997948
LOC103968856
LOC103989491
LOC103990532
LOC103990389
LOC103971534
LOC103998932
LOC103992175
LOC103983225
LOC103992437
LOC103992929
LOC103971831
LOC103993470
LOC103983951
LOC103974820
LOC103993252
LOC103990209
LOC103968991
LOC104000604
LOC103990635
LOC103982333
LOC103970476
LOC103970473
LOC103979572
LOC103999709
LOC103983720
LOC103980616
LOC103968740
LOC103988950
LOC103997382
LOC103999597
LOC104000484
LOC103986552
LOC103996593
LOC104000324
LOC104000104
LOC103975542
LOC103987867
LOC103986872
LOC103980437
LOC103975446
LOC103985693
LOC103991367
LOC103969856
LOC103989618
LOC103983210
LOC103987067
LOC103987907
LOC103999840
LOC103982988
LOC103984228
LOC103977252
LOC103997378
LOC103984331
LOC103972399
LOC103973045
LOC103996594
LOC103990539
LOC103993495
LOC103982076
LOC103972578
LOC103991458
LOC103988718
LOC103981986
LOC103981155
LOC103991206
LOC103997785
LOC103981720
LOC103969610
LOC103992510
LOC103968950
LOC103986374
LOC103997871
LOC103969357
LOC103998513
LOC103993711
LOC103968371
LOC103980752
LOC103995879
LOC103972263
LOC103986889
LOC103997866
LOC103992933
LOC104000340
LOC103978816
LOC103990354
LOC103980240
LOC103983686
LOC103983932
LOC103998884
LOC103987871
LOC103985851
LOC103989748
LOC103985540
LOC103970759
LOC103989448
LOC103969161
LOC103980648
LOC103982581
LOC103994605
LOC103990752
LOC103984862
LOC103972035
LOC103994329
LOC103997972
LOC104000488
LOC103991904
LOC103999482
LOC103987869
LOC103983507
LOC103968732
LOC103977002
LOC103983286
LOC103973584
LOC103998095
LOC103990379
LOC103968974
LOC103991655
LOC103979879
LOC103993089
LOC103996981
LOC103993343
LOC103995611
LOC103973632
LOC104000979
LOC103992763
LOC103969556
LOC103978161
LOC103984183
LOC103985487
LOC103971789
LOC103980597
LOC103993845
LOC103992835
LOC103998642
LOC103971212
LOC103998784
LOC103976969
LOC103990543
LOC103991297
LOC103998856
LOC103988212
LOC103986106
LOC103981532
LOC103976473
LOC103996627
LOC103989533
LOC103988656
LOC103970236
LOC103992708
LOC103970521
LOC103995713
LOC103979274
LOC103993320
LOC103973763
LOC103987676
LOC103971185
LOC103984977
LOC103969715
LOC103982871
LOC103974046
LOC103994042
LOC103975633
LOC103990745
LOC103989602
LOC103988209
LOC103994529
LOC103970104
LOC103993391
LOC103975984
LOC103984201
LOC103970826
LOC103981780
LOC103993334
LOC103971467
LOC103971732
LOC103988289
LOC103993679
LOC103997025
LOC103990058
LOC103971269
LOC103991773
LOC103974407
LOC103989292
LOC103973654
LOC103972992

## Sheet: Bacillus_1h_96h_Intersection
Gene
NCBI Gene		List of the 166 differentially expressed genes exclusively shared by treatments Baciilus 1h and Baciilus 96h. See figure below.
LOC103979906
LOC103980148
LOC103969395
LOC103997204
LOC103999492
LOC103974847
LOC103995831
LOC103998875
LOC103972334
LOC103993575
LOC104000193
LOC103974846
LOC103980457
LOC103987503
LOC103989520
LOC103977229
LOC103999797
LOC103991562
LOC103977085
LOC103992026
LOC103984282
LOC103996663
LOC103983555
LOC104000307
LOC103979734
LOC103986181
LOC103995280
LOC103985296
LOC103969029
LOC103987751
LOC103995574
LOC103997884
LOC103991516
LOC103992117
LOC103985006
LOC103968936
LOC103988708
LOC103990102
LOC103998089
LOC103977847
LOC103988609
LOC103994872
LOC103969489
LOC103970087
LOC103987527
LOC103998463
LOC103982802
LOC103978378
LOC103969152
LOC103988152
LOC103974632
LOC103979674
LOC103980421
LOC103986626
LOC103989706
LOC103980177
LOC103996619
LOC104000725
LOC103986394
LOC103972000
LOC103970064
LOC103990260
LOC103975682
LOC103969565
LOC103984666
LOC103979331
LOC103996618
LOC103983583
LOC103986721
LOC103979080
LOC103989449
LOC103995799
LOC103986657
LOC103988229
LOC103989843
LOC103996510
LOC103989987
LOC103971273
LOC103970417
LOC103993314
LOC103997814
LOC103999747
LOC103997039
LOC104000651
LOC103968458
LOC103981004
LOC103974933
LOC103977988
LOC103984510
LOC103969146
LOC103999470
LOC103999910
LOC103971827
LOC103985402
LOC103996605
LOC103984639
LOC103982473
LOC103979546
LOC103976739
LOC103996641
LOC103996200
LOC103977443
LOC103992705
LOC103973608
LOC103977653
LOC103976360
LOC103972669
LOC103977612
LOC104000931
LOC103972274
LOC103968769
LOC103982626
LOC103978329
LOC103975164
LOC103984717
LOC103989841
LOC103970270
LOC103987289
LOC103986053
LOC103992519
LOC103972919
LOC103991509
LOC103994463
LOC103994672
LOC103980929
LOC103983237
LOC103989418
LOC103990768
LOC103995680
LOC103993650
LOC103996187
LOC103981359
LOC103983598
LOC103974605
LOC103986901
LOC103993333
LOC103991618
LOC103981791
LOC104000688
LOC103984185
LOC103999385
LOC103988703
LOC103986573
LOC103995575
LOC103994671
LOC103990423
LOC103996629
LOC103975375
LOC103987630
LOC103991592
LOC103995246
LOC103982392
LOC103972125
LOC103994146
LOC103993858
LOC103976280
LOC103982437
LOC103989710
LOC103978994
LOC103983015
LOC103975482
LOC103984773
LOC103975393
LOC103976440
LOC103970390

## Sheet: Bacillus_1h_48h_96h_Intersectio
NCBI Gene
LOC103999297		List of the 123 differentially expressed genes shared by treatments Bacillus 1h, Bacillus 48h and Bacillus 96h. See figure below.
LOC103972371
LOC103997701
LOC103978608
LOC103984066
LOC103994095
LOC103983145
LOC103996822
LOC103986537
LOC103971548
LOC103989568
LOC103970139
LOC103999329
LOC103985511
LOC103991351
LOC103976374
LOC103992086
LOC103994454
LOC103975985
LOC103999647
LOC104000233
LOC103998902
LOC103986775
LOC103992213
LOC103987361
LOC103992196
LOC103972282
LOC104000137
LOC103974773
LOC103979760
LOC103984194
LOC103976748
LOC103998260
LOC103978408
LOC103990849
LOC103975731
LOC104000996
LOC103995969
LOC103987539
LOC103995597
LOC103992743
LOC103986087
LOC103983136
LOC103977424
LOC103972451
LOC103973880
LOC103985947
LOC103989628
LOC103980093
LOC103991704
LOC103996704
LOC103971078
LOC103997576
LOC104000318
LOC103993551
LOC103974217
LOC103994690
LOC104000872
LOC103995332
LOC103991591
LOC103992513
LOC103991639
LOC103985192
LOC103982461
LOC103986372
LOC103995455
LOC103971288
LOC103995030
LOC103983858
LOC103976855
LOC103985241
LOC104000844
LOC103996984
LOC103997682
LOC103998362
LOC103968977
LOC103974388
LOC103985740
LOC103975993
LOC103969401
LOC103996253
LOC103998625
LOC103993219
LOC103988136
LOC103976295
LOC103995749
LOC103987432
LOC103969254
LOC103998403
LOC103989093
LOC103988759
LOC103973925
LOC103998933
LOC103992184
LOC103989649
LOC103975328
LOC103992986
LOC103999445
LOC103987156
LOC103991761
LOC103983075
LOC103983643
LOC103986197
LOC103973941
LOC103988314
LOC103977770
LOC103986620
LOC104000196
LOC103992627
LOC103969204
LOC103986011
LOC103992496
LOC103969392
LOC103997467
LOC103998047
LOC104000185
LOC103983379
LOC103980249
LOC103998694
LOC103992310
LOC103968739
LOC103994177
LOC103987473

## Sheet: Bacillus_48h_96h_Intersection
NCBI Gene
LOC103968644		List of the 560 differentially expressed genes exclusively shared by treatments Bacillus 48h and Bacillus 96h. See figure below.
LOC103998091
LOC103968833
LOC103980398
LOC103997319
LOC103996261
LOC103986341
LOC104000178
LOC103977175
LOC103998703
LOC103977654
LOC103986057
LOC103998486
LOC103988171
LOC103996582
LOC103970798
LOC103972273
LOC103990092
LOC104000458
LOC103979997
LOC103975278
LOC104001019
LOC103991938
LOC103999142
LOC103995106
LOC103996584
LOC103985522
LOC103971804
LOC103984804
LOC103990019
LOC103975650
LOC103988681
LOC103991700
LOC103998816
LOC103998990
LOC103999795
LOC103989081
LOC103985304
LOC103972223
LOC104000746
LOC103992275
LOC103973318
LOC103971058
LOC103991030
LOC103975648
LOC103972892
LOC103968611
LOC103976604
LOC103977103
LOC103987935
LOC103990723
LOC103995933
LOC103973007
LOC103986984
LOC103973189
LOC103972957
LOC103969642
LOC103985469
LOC103977207
LOC103976685
LOC103991952
LOC103990214
LOC103991615
LOC103980353
LOC103986066
LOC103981925
LOC103995977
LOC103981398
LOC104000805
LOC103984127
LOC103997416
LOC103970060
LOC103990508
LOC103997697
LOC103976146
LOC103979811
LOC103992069
LOC103975027
LOC103968821
LOC103991493
LOC103998017
LOC103993418
LOC103973577
LOC103991382
LOC103991748
LOC103996563
LOC103984509
LOC103977720
LOC103998622
LOC103998589
LOC103984099
LOC103969234
LOC103988712
LOC103982557
LOC103996634
LOC103979711
LOC103972300
LOC103992690
LOC103968345
LOC103982876
LOC103968378
LOC103999540
LOC103968359
LOC103989540
LOC103970414
LOC103997178
LOC103993281
LOC103989406
LOC103991966
LOC103991273
LOC103990684
LOC103998782
LOC103993803
LOC103978936
LOC103972093
LOC103996274
LOC103982343
LOC103987834
LOC103971808
LOC103976605
LOC103987692
LOC103991942
LOC103972809
LOC103974011
LOC103999555
LOC103991501
LOC103970068
LOC103971468
LOC103985911
LOC103972782
LOC103988698
LOC103999997
LOC103992798
LOC103986727
LOC103990191
LOC103968413
LOC103995679
LOC103999704
LOC103992465
LOC103996583
LOC103988166
LOC103987158
LOC103997830
LOC103973607
LOC103981440
LOC103991469
LOC103985615
LOC103971974
LOC103975054
LOC103976405
LOC103994878
LOC103999177
LOC103978246
LOC103996223
LOC103985993
LOC103985017
LOC103988469
LOC103997079
LOC103981366
LOC103989178
LOC103989668
LOC103992375
LOC103983591
LOC104000016
LOC103968921
LOC103987519
LOC103992727
LOC103989587
LOC103970293
LOC103974505
LOC103983246
LOC103989972
LOC103978567
LOC103996869
LOC103972338
LOC103996812
LOC103996389
LOC103972185
LOC103975908
LOC103987223
LOC103978481
LOC103986608
LOC103971388
LOC103983700
LOC103989220
LOC103997261
LOC103983920
LOC103991989
LOC103986336
LOC103995854
LOC103976149
LOC103995299
LOC103984200
LOC103978167
LOC103978375
LOC103988079
LOC103988575
LOC103978505
LOC103989689
LOC103971909
LOC103989635
LOC103981200
LOC103982338
LOC103982188
LOC103971621
LOC103969384
LOC103997989
LOC103995862
LOC103973555
LOC103981745
LOC103972057
LOC103995451
LOC103984981
LOC103992780
LOC103987496
LOC104000795
LOC103974976
LOC103993224
LOC103982521
LOC103981754
LOC103977190
LOC103969209
LOC103969608
LOC103991479
LOC103974136
LOC103984579
LOC103973009
LOC103968923
LOC103970629
LOC103973161
LOC103989384
LOC103999774
LOC103979211
LOC103982699
LOC103987484
LOC103998502
LOC103988680
LOC103982340
LOC103991319
LOC103989554
LOC103985778
LOC103970428
LOC103995572
LOC103994887
LOC103968499
LOC103982634
LOC103998494
LOC103971103
LOC103979137
LOC103997368
LOC103974142
LOC103968395
LOC103981365
LOC103998483
LOC103997381
LOC103995161
LOC103982031
LOC103998306
LOC103992750
LOC103998289
LOC103997423
LOC103987488
LOC103977123
LOC103984472
LOC103972920
LOC103990113
LOC103974412
LOC103987224
LOC103993377
LOC103987399
LOC103983871
LOC103979212
LOC103985709
LOC103994561
LOC104000374
LOC103985846
LOC103986793
LOC103981620
LOC103992187
LOC103985626
LOC103977717
LOC103996856
LOC103981843
LOC103977163
LOC104001037
LOC103989206
LOC103999794
LOC103989339
LOC103972620
LOC103981473
LOC103977734
LOC103984209
LOC103977951
LOC103989221
LOC103969635
LOC103997286
LOC103982284
LOC103970742
LOC103990319
LOC103978549
LOC103989382
LOC103971281
LOC103968681
LOC103986844
LOC103984030
LOC103990407
LOC103977957
LOC103992106
LOC103979752
LOC103980966
LOC103984498
LOC103992644
LOC103971145
LOC103975647
LOC103995322
LOC103987655
LOC103984468
LOC103995646
LOC103973015
LOC103995818
LOC103970511
LOC103984169
LOC103969480
LOC103973055
LOC103970559
LOC103984996
LOC103999905
LOC103994478
LOC103984567
LOC103976586
LOC104000337
LOC103975635
LOC103996881
LOC103986119
LOC103975791
LOC103983600
LOC103997578
LOC103982262
LOC103971944
LOC103995323
LOC103975649
LOC103973427
LOC103999102
LOC103986381
LOC103993671
LOC103974563
LOC103980893
LOC103999944
LOC103972143
LOC103994588
LOC103983189
LOC103999922
LOC103990082
LOC103986790
LOC103975096
LOC103977778
LOC103976380
LOC103977146
LOC103985044
LOC103968707
LOC103969478
LOC103988578
LOC103999312
LOC103996934
LOC103979164
LOC103982337
LOC103988593
LOC103992170
LOC103969371
LOC103973211
LOC103976599
LOC103995029
LOC103998407
LOC103999481
LOC103985191
LOC103993951
LOC103978845
LOC103998733
LOC103997113
LOC103992167
LOC103999662
LOC103998877
LOC103977230
LOC103977167
LOC103990174
LOC103979292
LOC103993528
LOC103968356
LOC103999733
LOC103968995
LOC103969283
LOC103969972
LOC104001030
LOC103971017
LOC103995819
LOC104000636
LOC103980786
LOC103981700
LOC103970991
LOC103992216
LOC103986497
LOC104000331
LOC103975709
LOC103981538
LOC103998725
LOC103982731
LOC103987715
LOC103970289
LOC103992856
LOC103973847
LOC103979428
LOC103986543
LOC103986711
LOC103982242
LOC103981825
LOC103990047
LOC103996158
LOC103972785
LOC103995567
LOC103986344
LOC103978197
LOC103999804
LOC103980817
LOC103988504
LOC103975910
LOC103975634
LOC103996029
LOC103995301
LOC103985839
LOC103988039
LOC103990759
LOC103984744
LOC103992133
LOC103968354
LOC103978033
LOC103996756
LOC104000310
LOC103985332
LOC103995773
LOC103991366
LOC103996047
LOC103992006
LOC103996800
LOC103987747
LOC104000506
LOC103999026
LOC104000030
LOC103984237
LOC103991283
LOC103973140
LOC103987057
LOC103977071
LOC103977159
LOC103983655
LOC103995242
LOC103991167
LOC103994179
LOC103972271
LOC103969451
LOC103982312
LOC103985441
LOC103983818
LOC103971203
LOC103974205
LOC103969164
LOC103979451
LOC103991371
LOC103971996
LOC103993110
LOC103970206
LOC103973536
LOC103982057
LOC103987690
LOC103996370
LOC103977104
LOC103975374
LOC103989656
LOC103999299
LOC103974724
LOC103998448
LOC103983934
LOC103992923
LOC103998554
LOC103976102
LOC103970084
LOC103995950
LOC103984056
LOC103988743
LOC103974515
LOC104000009
LOC103987167
LOC103979383
LOC103969405
LOC103972349
LOC103995404
LOC103978170
LOC103976919
LOC103994005
LOC103972323
LOC104000733
LOC103984247
LOC103981407
LOC103983698
LOC103983011
LOC103992910
LOC103991729
LOC103998908
LOC103981974
LOC103987962
LOC103979920
LOC103974539
LOC103986709
LOC103994551
LOC103976058
LOC103998424
LOC103972257
LOC103983119
LOC103971608
LOC103995598
LOC103993362
LOC103986975
LOC103970659
LOC103978156
LOC103972730
LOC103989297
LOC103971767
LOC103977279
LOC103977073
LOC103987535
LOC103971205
LOC103986747
LOC103998630
LOC103989579
LOC103978249
LOC103997675
LOC103986009
LOC103985635
LOC103993689
LOC103992619
LOC103993193
LOC103991322
LOC103974037
LOC103993208
LOC103995303
LOC103998066
LOC103970583
LOC103984799
LOC103983052
LOC103999070
LOC103985302
LOC103987634
LOC103992009
LOC103992286
LOC103995189
LOC103987070
LOC103968625
LOC103987688
LOC103992540
LOC103997992
LOC103984031

## Sheet: Bacillus_96h_Exclusive
NCBI Gene
LOC103994336		List of the 401 differentially expressed genes exclusive in treatment Bacillus 96h. See figure below.
LOC103997858
LOC103992294
LOC103979987
LOC103974030
LOC103997181
LOC103991515
LOC103994530
LOC103984628
LOC103995162
LOC103992023
LOC103992433
LOC103986376
LOC103998361
LOC103982658
LOC103979054
LOC103976263
LOC103997922
LOC104000187
LOC103996303
LOC103991950
LOC103973160
LOC103986499
LOC103999127
LOC103977864
LOC103989091
LOC103976540
LOC103976012
LOC103976375
LOC104000288
LOC103969056
LOC103979132
LOC103985238
LOC103991826
LOC103983206
LOC103981875
LOC103986656
LOC103976699
LOC103997560
LOC103995187
LOC103980152
LOC103997644
LOC103975026
LOC103998624
LOC103994674
LOC103969672
LOC103973385
LOC103982935
LOC103974587
LOC103976377
LOC103978715
LOC103970316
LOC103979567
LOC104000271
LOC103997199
LOC103980088
LOC103972331
LOC103968687
LOC103992816
LOC103989930
LOC103996951
LOC103978911
LOC103984088
LOC104000467
LOC103982436
LOC103969749
LOC103994503
LOC103994906
LOC103991514
LOC103969924
LOC103981259
LOC103995288
LOC103983146
LOC103988407
LOC103990466
LOC103969336
LOC103993226
LOC103983986
LOC103993920
LOC103999272
LOC103992536
LOC103981010
LOC103994685
LOC103993939
LOC103981759
LOC103969614
LOC103989175
LOC103997881
LOC103972319
LOC103971263
LOC103997540
LOC103997310
LOC103986762
LOC103996088
LOC103988937
LOC103979874
LOC103980637
LOC103987115
LOC103991346
LOC103978985
LOC103989283
LOC103987818
LOC103995740
LOC103991960
LOC103992806
LOC103992568
LOC103994990
LOC103996899
LOC103969097
LOC103993496
LOC103969136
LOC103993786
LOC104000920
LOC104000304
LOC103987768
LOC103987810
LOC103997744
LOC103997602
LOC103969811
LOC103973550
LOC103978794
LOC103969411
LOC103981309
LOC103971401
LOC103989523
LOC103989489
LOC103968897
LOC103982399
LOC103998683
LOC103996818
LOC103992107
LOC103975825
LOC103982953
LOC103982311
LOC103973487
LOC103977706
LOC103983558
LOC103969205
LOC103995540
LOC103982532
LOC103976880
LOC103988927
LOC103989913
LOC103975153
LOC103993979
LOC103974029
LOC103995847
LOC103991406
LOC103990131
LOC103998352
LOC103982536
LOC103993598
LOC103972564
LOC103976910
LOC103969076
LOC103987507
LOC103974146
LOC103999741
LOC103999586
LOC103990318
LOC103997077
LOC103978933
LOC103994715
LOC103991388
LOC103970294
LOC103987161
LOC103988016
LOC103998693
LOC103978143
LOC103993647
LOC103973170
LOC103995240
LOC103982255
LOC103981459
LOC103972966
LOC103991617
LOC103979030
LOC103976936
LOC103998358
LOC103998201
LOC104000647
LOC103972102
LOC103983943
LOC103976700
LOC103996797
LOC103972741
LOC103985554
LOC103981216
LOC103983883
LOC103982291
LOC103979557
LOC103990325
LOC103986237
LOC103977472
LOC103987037
LOC103976866
LOC103974645
LOC103971640
LOC103987415
LOC103977835
LOC103971926
LOC103983043
LOC103976067
LOC103983455
LOC103972122
LOC103970775
LOC103969564
LOC104000818
LOC103969199
LOC104000155
LOC103974855
LOC103984866
LOC103986617
LOC103978768
LOC103978415
LOC103994298
LOC103973792
LOC103971762
LOC104000097
LOC103972950
LOC103988895
LOC103985513
LOC103992211
LOC103985317
LOC103984756
LOC103994750
LOC103999180
LOC103995391
LOC103970515
LOC103990757
LOC103988336
LOC103977534
LOC103982019
LOC103968540
LOC103984250
LOC103986097
LOC103978409
LOC103968609
LOC103998120
LOC103989287
LOC103989222
LOC103974684
LOC103990563
LOC103991199
LOC103988646
LOC103974634
LOC103973202
LOC103979966
LOC103979821
LOC103968806
LOC103984755
LOC103977990
LOC103978149
LOC103986675
LOC103996809
LOC103982217
LOC103990359
LOC103995379
LOC103998710
LOC103978970
LOC103997404
LOC103984658
LOC103982195
LOC103997829
LOC103970654
LOC103985200
LOC103981104
LOC103991410
LOC103997640
LOC103994696
LOC103988342
LOC103976195
LOC103993105
LOC103979306
LOC103997190
LOC103993560
LOC103995088
LOC103983850
LOC103983697
LOC103976161
LOC103986274
LOC103968575
LOC103991728
LOC103974335
LOC103999610
LOC103969329
LOC103983777
LOC103972868
LOC103999590
LOC103981689
LOC103994970
LOC103973443
LOC103979551
LOC103991622
LOC103979167
LOC103992692
LOC103981960
LOC103973794
LOC103973684
LOC103980631
LOC103980844
LOC103972625
LOC103981350
LOC103999315
LOC103971348
LOC103991586
LOC103996992
LOC104000348
LOC103969612
LOC103972434
LOC103993415
LOC103989965
LOC103990822
LOC103972337
LOC103982259
LOC103994597
LOC103992641
LOC103980200
LOC103980639
LOC103998052
LOC103993068
LOC103984198
LOC103972406
LOC103985473
LOC103977447
LOC103999250
LOC103987110
LOC103977595
LOC103983880
LOC103989498
LOC103970819
LOC103983614
LOC103997294
LOC103997723
LOC103986595
LOC103985410
LOC103979282
LOC103971707
LOC103987702
LOC103987074
LOC103970588
LOC103978461
LOC103972784
LOC103983168
LOC103973639
LOC103986687
LOC103991135
LOC103970479
LOC103971749
LOC103997702
LOC103988749
LOC103996921
LOC103987143
LOC103983495
LOC103973321
LOC103979883
LOC103980293
LOC104000847
LOC103991914
LOC103975417
LOC103996032
LOC103984547
LOC103989738
LOC103978891
LOC103996328
LOC103990944
LOC103993271
LOC103987903
LOC103988046
LOC103999646
LOC103972408
LOC103979359
LOC103987830
LOC103969135
LOC103994809
LOC103980454
LOC103996188
LOC103978007
LOC103975217
LOC103969266
LOC103990112
LOC103984061
LOC103979016
LOC103992421
LOC103996159
LOC103988780
LOC103982809
LOC103987338
LOC103993013
LOC103989444
LOC103981655
LOC103979352
LOC104000358
LOC103990904
LOC103990594
LOC103970984
LOC103989066
LOC103984312
LOC103976098
LOC103991656
LOC103993557
